# Supplementary material
Source: bioRxiv or medRxiv preprint supplement (https://www.biorxiv.org/highwire/filestream/70500/field_highwire_adjunct_files/0/230920-1.pdf)
Supplement: Supplementary file [file 230920-1.pdf]

# 1 Supplementary Note

2 Here we have provided details about the animals and phenotypes measured in this study in accordance with ARRIVE  
3 Guidelines (see **Supplementary File 2** for our ARRIVE checklist). All mouse experiments were approved by the  
4 University of Chicago Institutional Animal Care and Use Committee (<https://iacuc.uchicago.edu/>). We describe how  
5 phenotypes were collected and analyzed and we describe how we identified and corrected sample mix-ups in GBS  
6 and RNA-seq data. We also provide background about genome-wide significance thresholds and our rationale for  
7 using 1.5-LOD intervals to define associated loci. Finally, we list software and online resources that we used in our  
8 analyses.

## 9 1. Phenotypes

### 10 1.1. Overview of phenotype data pre-processing

11 We measured phenotypes in 1,123 AIL mice (562 female, 561 male) (Aap: LG,SM-G50-56) but only processed  
12 phenotype data for 1,063 mice (530 female, 533 male) that had high-quality GBS data. Sex was included as a  
13 covariate in all trait models. Other covariates (e.g. batch, generation, coat color, testing chamber) were selected in  
14 three stages: (1) we used the adjusted r-squared statistic from a univariate linear regression model to estimate the  
15 percent of phenotypic variance explained by each variable. (2) Variables that explained 1% or more of the trait  
16 variance were used in the model selection R package, leaps, to identify an optimal set of predictors for each trait. (3)  
17 We then reviewed each list of selected covariates and made revisions if necessary (trait-specific details are provided  
18 below). Residuals from the final trait models were plotted to identify outliers. An individual was considered an outlier if  
19 its residual value was more than three standard deviations from the mean and fell outside the 99% confidence interval  
20 of the normal distribution. Traits were quantile-normalized after removing outliers. The final sample size for each trait is  
21 shown in **Supplementary Table 2** along with a list of covariates used for GWAS.

### 22 1.2 Conditioned place preference (**CPP**) and locomotor behavior

#### 23 1.2.1. CPP paradigm and testing environment

24 CPP is an associative learning paradigm that measures the motivational properties of a drug and the ability to  
25 associate its effects with a particular environment<sup>40</sup>. Mice learn to distinguish between two environments that are  
26 paired with either administration of a drug or administration of saline. After repeated pairings, mice are given a choice  
27 between the two environments. An increased amount of time spent in the drug-paired environment is interpreted as  
28 'preference' for the drug.

29  
30 As described previously<sup>41</sup>, we created two visually and tactilely distinct environments by dividing a transparent acrylic  
31 testing chamber (37.5 × 37.5 × 30 cm; AccuScan Instruments, Columbus, OH, USA) into equally sized arenas using an  
32 opaque divider with a passage (5 × 5 cm) in the bottom center. The other three walls of each partition are distinguished  
33 by visual cues (stripes on the walls) and tactile cues (floor textures). The chamber is placed inside a frame that  
34 transmits an evenly spaced grid of infrared photo beams through the chamber walls. Beam breaks used to monitor the  
35 mouse's activity and location are converted to time (sec) and distance (cm) units by the AccuScan VersaMax Software  
36 (AccuScan Instruments, Columbus, OH, USA). Each testing chamber is encased within a sound attenuating  
37 PVC/lexan environmental chamber. Overhead lighting provides low illumination (~80 lux), and a fan provides both  
38 ventilation and masking of background noise.

39  
40 We reversed the divider during conditioning trials to restrict the mouse to one arena within the testing chamber. 1  
41 mg/kg methamphetamine was always paired with the left arena (white horizontal stripes, smooth floor) and  
42 physiological saline was always paired with the right arena (black vertical stripes, textured floor). We had previously  
43 established that mice did not prefer one arena over the other<sup>41</sup>. The 1 mg/kg dose of methamphetamine was intended  
44 to generate preference and locomotor stimulation without inducing stereotyped behaviors.

#### 45 1.2.2. Measurement of CPP and locomotor behavior

46 CPP and locomotor activity were measured simultaneously. Up to a dozen mice were tested using 12 separate CPP  
47 chambers. Median age at the beginning of CPP was 54 days (mean=55.09, range=35-101). On each day (**D**) of the  
48 assay, mice were placed on a porSupplementary Table shelf and were transported from the colony to an adjacent

49 testing room. Mice were given 30-45 min to acclimate to the room before being removed from their home cages.  
50 Before each 30-minute test, mice were weighed and momentarily separated into clean holding cages. After injection  
51 and placement into test chambers, mice were free to travel between arenas on D1 and D8 after receiving an  
52 intraperitoneal injection of physiological saline. On D2-D5 (conditioning trials) mice were intraperitoneally administered  
53 either methamphetamine (1 mg/kg, D2 and D4) or vehicle (saline, D3 and D5) in a volume of 0.01 ml/g body weight.  
54 We also measured locomotor activity (total distance travelled in cm) on each day and recorded the number of times  
55 the mouse switched between sides of the chamber on D1 and D8. After each 30-minute testing session, we returned  
56 mice to their home cages. Test chambers were cleaned with 10% isopropanol between runs. Home cages were  
57 returned to the colony at the end of each experiment.

### 58 1.2.3. Analysis of CPP and locomotor behavior

59 We define CPP as the increase in time spent in the methamphetamine-paired arena on D8 compared to D1. To  
60 account for the possibility of initial preference for one arena, we also considered preference on the final test day  
61 (without regard to preference on D1) as a second outcome measure for CPP. We refer to locomotor activity on day 1  
62 as the locomotor response to a novel environment. The locomotor response to saline is measured on D3 and D5. We  
63 also measure activity on D8; locomotor activity on both D1 and D8 are unique in that the environment is different  
64 because the mouse has access to the entire CPP chamber. Side changes measured on D1 and D8 provided additional  
65 measures of locomotor activity in response to novelty and saline, respectively. The locomotor response to 1 mg/kg  
66 methamphetamine is measured on D2 and D4. We also calculated the increase in methamphetamine-induced activity  
67 on D4 relative to D2 as a measure of locomotor sensitization. Locomotor sensitization is an increase in the magnitude  
68 of drug-induced activity after repeated administration of the same (or subthreshold) dose of the drug<sup>71</sup>.

69  
70 Because behavior is a dynamic response to the environment, we treated each day's measurements as a different set  
71 of traits. For example, a mouse's preference for an environment may change after associating it with a rewarding (or  
72 aversive) drug experience, and a drug-naïve mouse may have a different response to methamphetamine than a  
73 mouse that has already experienced its effects<sup>72</sup>. All CPP and locomotor phenotypes were measured in 5-minute bins  
74 over the course of 30 minutes. We summed measurements across all six 5-minute time bins to obtain total activity for  
75 each day and the total number of side changes side changes for D1 and D8. Thus, we obtained seven individual  
76 measurements: the total, and the six individual 5-minute time bins. As shown in **Supplementary Fig. 13**, binned  
77 measurements are highly correlated; therefore, we used the same set of covariates for all binned phenotypes within a  
78 given day and phenotype class.

79  
80 Occasional software malfunctions that occurred at the time of testing (in which the Accuscan software was unable to  
81 record movement in certain chambers for up to 14 seconds during the test) were automatically detected and included  
82 in the output for each 5-min time interval in which the error occurred. Data for these specific intervals and total activity  
83 on the affected day were marked as missing in 61 mice. Data were quantile-normalized prior to GWAS.

## 84 1.3. Prepulse inhibition of the acoustic startle response (PPI)

### 85 1.3.1. PPI paradigm and testing environment

86 When a mouse is startled by a loud noise the mouse's skeletal muscles contract rapidly. PPI is the reduction of this  
87 startle response ('**startle**') when the startle stimulus is preceded by a low decibel (**dB**) tone<sup>48</sup> and is considered to be  
88 an endophenotype for various psychiatric conditions, most notably schizophrenia<sup>34</sup>. To measure PPI, each mouse is  
89 placed inside a 5-cm Plexiglas cylinder within a lit, ventilated testing chamber (San Diego Instruments, San Diego, CA,  
90 USA), as described previously<sup>8</sup>. The mouse's movements are detected by a piezoelectric sensor. Once inside the  
91 chamber, mice have five minutes to acclimate to 70 dB white noise, which remains in the background for the duration  
92 of the 18-minute test. After acclimation, mice are repeatedly exposed to acoustic startle stimuli (120 dB pulse; 40 ms)  
93 which is sometimes preceded by a 20 msec prepulse (3-12 dB above background noise) at variable intervals.

94  
95 The acclimation period is followed by 62 trials that are a mixture of the following five types: a 'pulse alone trial', which  
96 consists of a 40-millisecond 120 dB burst (startle stimulus), a 'no stimulus' trial where no stimulus is presented, and  
97 three prepulse trials containing a 20 msec prepulse that is either 3, 6 or 12 dB above the 70-dB background noise level  
98 followed 100 msec later by a 40 msec 120 dB pulse. Trials are split into four consecutive blocks. Blocks 1 and 4 each  
99 contain 6 pulse-alone trials. Blocks 2 and 3 are a mixture of 25 trials (6 pulse-alone, 4 no stimulus and 15 prepulse  
100 trials). The variable intertrial interval is 9-20 sec (mean=15 seconds) throughout all 62 trials.

### 101 1.3.2. Measurement of PPI and startle

102 We measured PPI 4-9 days after the last day of CPP (mean=7.13 days; median=7 days). Median age of mice at the  
103 time of testing was 68 days (mean=69.2, range=49-115). The PPI system was calibrated at the start of each testing  
104 day according to the manufacturer's instructions. Mice were transferred to the testing room one cage at a time,  
105 weighed, and then placed into the testing chamber. Mice were returned to their home cage after testing. PPI chambers  
106 were cleaned between sessions. Only the mice being tested were in the testing room to avoid exposing animals to the  
107 startling stimuli prior to the beginning of the test.

### 108 1.3.3. Analysis of PPI and startle

109 The startle response was calculated as the mean startle response across the startle-alone trials in blocks 1-4. We also  
110 performed GWAS for startle amplitude in blocks 1-4 separately. We define habituation to startle as the difference  
111 between the mean startle response during the first and last block of pulse-alone trials.

112  
113 We define PPI as the normalized difference between two values: the mean startle response during pulse-alone trials  
114 and the mean startle response during prepulse trials. The first value is the raw startle phenotype. The second value is  
115 calculated for each level of prepulse intensity (3, 6 and 12 dB above the 70 dB background noise) and divided by the  
116 raw startle value to obtain a proportion, which we transformed with the logit-10 function. To avoid extreme values  
117 caused by logit transformation of negative PPI values, we projected the transformed data onto an interval between  
118 0.01 and 0.99, as described previously<sup>17</sup>. Startle values, which are positive, were transformed with the log10 function.

119  
120 After transformation, we examined the distribution of startle responses during the no-stimulus trials to check for  
121 technical errors. Forty-four mice seemed to startle in the absence of a pulse (**Supplementary Fig. 20**), which we  
122 interpreted as a technical problem since all of these mice were tested in PPI box 3. We retained these mice in the  
123 analysis and included box 3 as a covariate for all PPI and startle phenotypes. Another group of mice had unusually low  
124 startle responses (**Supplementary Fig. 20**). It is likely that these mice are hearing-impaired because their startle  
125 responses overlapped the trait distribution for the no-stimulus trials (this was true once the 44 mice tested in box 3  
126 were excluded due to the technical artifact mentioned above). PPI-related phenotypes for 13 mice with a mean startle  
127 response of 1.1 units or lower were marked as missing. Data were quantile-normalized prior to GWAS.

### 128 1.4. Fasting blood glucose levels

129  
130 We measured blood glucose levels after a four-hour fast 4-14 days (mean=7.3 days, median=7) after PPI testing.  
131 Median age of mice at the time of testing was 75 days (mean=76.4, range=56-122). Mice were brought into the testing  
132 room between 09:00 and 09:30 and transferred to new cages that did not contain food. After four hours of fasting, we  
133 weighed each mouse and used a razor blade to make a small incision at the tip of the tail, which allowed us to obtain a  
134 small drop of blood that we analyzed with glucose strips (Bayer Contour TS Blood Glucose Test Strips) and a  
135 glucometer (Bayer Contour TS Blood Glucose Monitoring System). Glucose levels are expressed in mg/dL units. Once  
136 all of the mice in a cage were tested, we gave them fresh food and returned them to the colony. Glucose  
137 measurements were quantile-normalized before performing GWAS.

### 138 1.5. Coat color

139  
140 The LG x SM AIL segregates three coat color phenotypes. LG has a white (albino) coat. The SM strain is fully inbred  
141 except at the *agouti* locus on chromosome 2, where attempts to maintain a homozygous state have been  
142 unsuccessful; thus, LG x SM AIL mice can be either white (albino), black or brown (agouti)<sup>73</sup>. We transformed coat  
143 color into three indicator variables and treated them as quantitative traits for GWAS. We found this approach  
144 acceptable for testing our method because the genetic basis of coat color is well-known. Although GEMMA's linear  
145 mixed model (**LMM**) was intended for quantitative analysis, its robustness to model misspecification makes it  
146 acceptable for mapping factors expressed as binary indicator variables<sup>74</sup>.

147  
148 Because we did not expect to identify novel coat color loci, we did not consider coat color in the sum of 118 traits that  
149 we measured. Similarly, coat color did not contribute to the total number of associations reported in **Supplementary**  
150 **Table 1**. However, we provided heritability estimates for black, white and agouti coat in **Supplementary Table 2** as a  
151 benchmark for comparison to the quantitative traits of interest.

## 152 1.6. Wildness

153

154 Laboratory mice are known to vary in their ease of handling, or wildness<sup>75</sup>. Studying wildness could provide insight into  
155 the genetic consequences of domestication. We defined wild mice as those who escaped their home or holding cages  
156 in the moments leading up to the CPP test. Raw escape counts were converted into a binary indicator variable to  
157 account for increased experience in mouse handling by the experimenter. We did not find any loci associated with  
158 wildness, potentially due to lack of power (less than 10% of all mice were qualified as wild by our criteria). We also  
159 considered wildness as a potential covariate but found no evidence of its effect on the other traits.

## 160 1.7. Tissue collection

161

162 We collected tissues for DNA and RNA extraction and additional phenotyping by our collaborators 4-15 days  
163 (mean=7.46, median=7) after measuring glucose levels. We also measured body weight and tail length (cm from base  
164 to tip of the tail) at this time. Median age at death was 83 days (mean=84.4, range=64-129). Mice were removed from  
165 the colony immediately before dissection, weighed and killed using cervical dislocation followed by rapid decapitation  
166 and evisceration.

## 167 1.8. Hind limb muscle and bone

168

169 We phenotyped five muscles: two dorsiflexors, tibialis anterior (**TA**) and extensor digitorum longus (**EDL**), and three  
170 plantar flexors, gastrocnemius, plantaris and soleus. These muscles were selected because they differ in size and  
171 constitution of fiber types. Of the fast-twitch muscles, TA and gastroc are largest and express the entire range of type 2  
172 fibers and some type 1 fibers. EDL and plantaris are smaller fast-twitch muscles comprised mainly of type 2B, 2X and  
173 2A fibers. Soleus, a slow-twitch muscle, is comprised mostly type 1, 2A and 2X fibers<sup>76</sup>. Different morphological and  
174 functional properties are associated with each fiber type<sup>77</sup>, and we reasoned that muscles composed of different types  
175 might be regulated by distinct genetic mechanisms.

176

177 Tibia length is indicative of skeleton size, and elongation of bones is associated with longer, larger muscles. Therefore,  
178 in order to isolate muscle-specific loci (as opposed to loci that regulate growth across multiple tissues) we included  
179 tibia length as a covariate in muscle mass GWAS. Skeletal muscle contributes substantially to body weight in  
180 mammals. To avoid circular correction, which would reduce power to detect muscle weight loci, we did not use body  
181 weight as a covariate for muscle traits. All hind limb traits were quantile-normalized before GWAS.

182

## 183 1.9. Locomotor phenotypes in G34 and *Csmd1* mutant mice

184

185 Similar to LG x SM G50-56, locomotor behavior for G34 (ref. 7) and for *Csmd1* mutant mice was measured in six 5-  
186 minute bins for a total of 30 minutes. We did not observe covariate effects on locomotor behavior in *Csmd1* mutant  
187 mice; therefore, we used raw phenotype data to produce **Fig. 5e**. However, we quantile-normalized phenotypes for  
188 G34 after regressing out the effects of sex, testing chamber, and body weight (**Fig. 5d**). Covariates for G50-56 (listed  
189 in **Supplementary Table 2**) were also removed before quantile-normalizing the data to produce **Fig. 5c**.

190

## 191 2. GBS quality control

192

193 Mislabeling and sample mix-ups are common in large genetic studies and can reduce power for GWAS<sup>78</sup>. We were  
194 concerned about the possibility of samples being mistakenly swapped or mislabeled. Therefore, we called variants in  
195 two stages. First-pass variant calls were used to identify and resolve sample mix-ups (**Section 2.1**). In stage two, after  
196 correcting or discarding sample mix-ups, we repeated variant calling from scratch (**Section 2.2**).

### 197 2.1. Identification of GBS sample mix-ups

198

199 We used the ratio of reads that mapped to the X and Y chromosomes to validate the sex of each mouse. GBS data  
200 from LG, SM, and F1 controls (data sequenced from the same animals across multiple flow cells) and 24 mice that  
201 were genotyped using both GBS and the GigaMUGA were used as benchmarks, since the sex of these samples could  
202 be verified. For true females, we consistently observed that the number of X chromosome reads was an order of



magnitude greater than the number of Y chromosome reads. However, a difference greater than one order of magnitude was never observed for true males. Twelve samples that violated these criteria were flagged as potential sex swaps. We then checked breeding records, mouse cage cards, pedigree information, and experiment logs to determine if the source of each error was typographical. We identified two female mice that were incorrectly labeled as male and corrected these typos in our records. However, we did not reassign mouse IDs for the 10 remaining samples at this time. To do this, we examined kinship estimates from genetic and pedigree data.

Most mice in our sample had an opposite-sex sibling, which allowed us to identify errors by comparing pedigree kinship to the realized relationships estimated from genetic data using IBDLD<sup>54,55</sup>. To calculate genetic kinship with IBDLD, we used first-pass genotypes called using ANGSD<sup>52</sup> and Beagle<sup>53</sup>. Here, we required that only 15% of the samples have reads at a given site in order for a call to be made. We removed first-pass variants with  $MAF < 0.01$  before using Beagle to fill in missing genotypes at 106,180 loci. We did not impute from a reference panel at this stage; instead, we inferred missing data from LD within the sample. This ensured that all mice had a genotype at each empirically typed GBS allele while avoiding perpetuating widespread errors by imputing from a reference panel or pedigree.

The purpose of using less stringent criteria for first-pass calls than for the final call set was to ensure that we would have a sufficient number of overlapping GBS genotypes from Beagle to compare against GigaMUGA genotypes, which we obtained for 24 mice that were genotyped using GBS. The GigaMUGA contains probes for over 143,000 SNPs<sup>12</sup>. After removing GigaMUGA SNPs with an Illumina quality score  $< 0.7$ , we were left with 115,478 SNPs, only 24,934 of which were known to be polymorphic in LG and SM<sup>13</sup> (**Supplementary Fig. 1**). As shown in **Supplementary Table 5**, we evaluated concordance among overlapping GBS and GigaMUGA genotypes at multiple stages to guide filtering and gauge the efficacy of our variant calling pipeline; for example, using a more stringent threshold for imputation quality (dosage  $r^2$ ;  $DR^2$ ) resulted in greater genotype concordance.

Approximately 86,180 first-pass Beagle variants with  $DR^2 > 0.7$  and  $MAF > 0.1$  were used to calculate genetic kinship coefficients with IBDLD<sup>54,55</sup>. Pedigree kinship was calculated using a custom R script (see **URLs**). We estimated both types of kinship for every possible pair of mice in the sample. We compared the estimates by subsetting the data into sibling pairs and non-sibling pairs, which we identified using pedigree data. We flagged non-siblings with higher than average kinship and siblings with lower than average kinship compared to the rest of the subset. We identified 21 non-sibling pairs with unusually high genetic kinship and 22 sibling pairs with unusually low genetic kinship, 8 of which had already been flagged as sex swaps. In some cases, apparent mix-ups were caused by typos; we resolved these by comparing cage cards against breeding logs and experiment records. We also verified homozygous LG genotypes at the *Tyr* locus for mice listed as albino. When possible, we cross-checked GBS genotypes with RNA-seq genotypes (described in **Section 3**).

Ultimately there were 15 out of 1,078 samples whose identities could not be resolved (some of these mice did not have a sibling in the data). These mice were included in the process of variant calling for the final sample because they provided additional information for obtaining genotype likelihoods in ANGSD. However, they were discarded before imputation and were not used for mapping. In the error-corrected data, GBS and GigaMUGA genotype concordance for 18,278 overlapping SNPs after reference panel imputation and filtering was 97.4% (**Supplementary Table 5**). This is similar to concordance rates observed for other animal populations genotyped with GBS<sup>17,79</sup> and falls within the range of imputation concordance rates reported in human studies<sup>80,81</sup>.

## 2.2. Variant calling and quality control for error-corrected data (n=1,063)

### 2.2.1. Genotype likelihoods

We used an implementation of the Samtools<sup>82</sup> variant calling algorithm in ANGSD<sup>52</sup> to obtain genotype likelihoods at 899,436 sites for which at least 20% of samples had reads. GBS produces variable coverage across individuals, which leads to highly heterogeneous call rates. In addition, GBS has a bias toward homozygous calls<sup>49</sup>. Accordingly, we expected ANGSD's allele frequency estimates to be biased and used a lenient MAF threshold of 0.005 to filter raw genotype likelihoods.

### 2.2.2. Imputation

We used Beagle<sup>53,56</sup> to call genotypes from ANGSD likelihoods at 221,091 autosomal sites that passed our filters. When a reference panel is provided, Beagle requires hard genotype calls as input; however, ANGSD only outputs likelihoods. Therefore, we imputed missing genotypes in three steps. First, we used Beagle to phase and fill in missing calls using within-sample LD (no reference panel or pedigree was provided). This produces a file with hard genotype

calls, genotype probabilities and dosages that can be used to impute additional genotypes from an external reference panel. Next, we excluded SNPs with MAFs <0.1, leaving 38,238 variants for step three (we used this threshold because both alleles are expected to be common in an AIL; this was confirmed in G34 mice<sup>7</sup>). We then used Beagle to impute untyped SNPs from LG and SM reference haplotypes<sup>13</sup>. The JAX Mouse Map Converter (see **URLs**) was used to create a genetic map from mm10 base pair coordinates<sup>83</sup>. We retained 3.4M variants with very high imputation quality ( $DR^2 \geq 0.9$ ) and  $MAF > 0.1$  for further analysis.

### 2.2.3. Hardy-Weinberg Equilibrium (**HWE**)

An AIL is not a randomly mating population, its effective population size is not infinitely large, and LD is extensive. Selecting an appropriate threshold for excluding HWE deviations is further complicated by the tendency of GBS to wrongly call heterozygous genotypes as homozygous. We ran 1,000 gene dropping simulations in QTLRel<sup>84</sup> to simulate null genotypes consistent with the AIL pedigree (but not impacted by the overrepresentation of homozygotes that is observed when using GBS). We used the R package Hardy Weinberg<sup>85</sup> to test simulated genotypes for deviation from HWE. To reduce the computational burden of gene dropping, we restricted our analysis to 372,995 SNPs with unique centimorgan (cM) positions<sup>83</sup>. Chi-squared p-values  $\leq 7.62 \times 10^{-6}$  were only detected for 1% of simulated genotypes. We used this value to identify loci where the observed genotype proportions constituted a significant deviation from HWE given that the data are from an AIL. 52,466 SNPs (1.5% out of 3.4M imputed SNPs with  $DR^2 \geq 0.9$  and  $MAF \geq 0.1$ ) were found to deviate from HWE at  $p \leq 7.62 \times 10^{-6}$  and were excluded.

### 2.2.4 Linkage disequilibrium (**LD**)

Finally, we used PLINK to remove variants in high LD ( $r^2 > 0.95$ ), leaving 523,028 SNPs for GWAS and eQTL mapping<sup>67</sup>.

## 3. Identification and correction of RNA sample mix-ups

To identify samples that were apparently mislabeled with the incorrect mouse ID, we retrieved allele counts from each sample at sites with  $\geq 25$  reads and no more than one mismatched base; we used these data to produce RNA-seq genotype calls. We obtained up to three sets of RNA-seq genotypes (one per tissue). We measured RNA genotype concordance for all pairs of samples, expecting that the best match for each sample would be from a different tissue belonging to the same mouse. If the best match belonged to a different mouse, the samples were flagged as potential mix-ups.

Next, we examined concordance between RNA and error-corrected GBS genotypes from phase one to reassign mixed-up sample IDs. If we could not resolve the identity of a sample, we discarded its expression data. 108 samples were discarded during this process (33 HIP; 36 PFC; 39 STR). We also discarded expression data for 29 samples whose genotype data was removed during GBS quality control (11 HIP; 9 PFC; 9 STR). The mean concordance rate among RNA genotypes derived from the same mouse was 94.6% after error correction, indicating that our approach was successful.

We also examined *Xist* (X-inactive specific transcript) expression to identify apparent sex mix-ups. *Xist* regulates dosage compensation and is only expressed in females. One STR sample associated with a male mouse (54896\_STR) had high *Xist* gene expression. One HIP and one STR sample associated with the same female mouse (56203\_HIP; 56203\_STR) had no *Xist* gene expression. We reassigned the sex of the two female tissue samples to male, since both samples belonged to the correct tissue and their RNA genotypes indicated that they were extracted from the same mouse. We excluded 54896\_STR from further analyses due to a lack of evidence for sample reassignment.

Finally, we used correlation-based statistics to identify and remove 12 additional outliers (2 HIP; 7 PFC; 3 STR). For each tissue, we computed the mean correlation of expression level for an individual  $i$ :

$$\bar{r}_i = \sum_j r_{ij} / (n - 1)$$

Where  $n$  is the number of mice in a tissue,  $j$  is remaining mice in the tissue that are not  $i$ , and  $r_{ij}$  is the gene expression correlation between an individual  $i$  and  $j$ . We considered an individual  $i$  as an outlier if  $\bar{r}_i < 0.9$ .

## 311 4. Genome-wide significance thresholds

### 312 4.1. Multiple hypothesis testing correction for GWAS

313 Because LD is greater in AILs than in human populations, we did not use  $5 \times 10^{-8}$  as a significance threshold.  
314 Furthermore, the complex relationships in an AIL imply a covariance among phenotypes and genotypes that makes  
315 the standard Bonferroni adjustment for multiple testing correction too conservative. Naïve permutation can effectively  
316 correct for multiple hypothesis testing even when the assumption of independence among phenotypes and genotypes  
317 is violated by relatedness<sup>15,86</sup>. Parametric bootstrapping can provide greater accuracy, but the computational expense  
318 of resampling null phenotypes and calculating their test statistics while also maintaining the covariance structure of the  
319 data makes it impractical for large studies<sup>15</sup>.

320  
321 We used MultiTrans<sup>59</sup> and SLIDE<sup>60</sup> to obtain a genome-wide significance threshold for GWAS because when  
322 combined, they offer a compromise between the two methods. Like parametric bootstrapping, MultiTrans estimates the  
323 phenotypic covariance ( $V$ ) under an LMM. Rather than proceeding to sample phenotypes from a multivariate normal  
324 distribution with covariance  $V$ , it uses  $V$  to transform the genotype data such that the correlation between transformed  
325 genotypes is equivalent to the correlation among test statistics sampled from an MVN<sup>59</sup>. This improves efficiency  
326 because it obviates the need to generate null phenotypes and calculate their p-values. Instead, p-values are sampled  
327 directly from a multivariate normal distribution using SLIDE, which accounts for LD between nearby markers.  
328

329 We specified a sliding window of 5,000 SNPs and used 2.5 million samples to obtain a per-marker threshold of  
330  $p=8.06 \times 10^{-6}$  given a genome-wide significance threshold ( $\alpha$ ) of 0.05. Because all phenotypic data was quantile-  
331 normalized, we applied the same threshold to all phenotypes.

### 332 4.2. LOD drop intervals

333 We considered using bootstrapping to estimate a confidence interval around each associated region; however, it is not  
334 clear that this approach would have been effective enough to justify the high computational cost<sup>87</sup>. Interval coverage  
335 depends on locus effect size, chromosome size, SNP density, and the location of the causal SNP in relation to the  
336 associated markers. Instead we converted p-values to LOD scores and used a 1.5-LOD support interval to  
337 approximate a critical region around each association. The LOD drop approach provides a quick, straightforward way  
338 to gauge mapping precision and systematically identify overlap between eGenes and candidate QTGs; however, it  
339 does not correspond to a specific confidence interval (e.g. 95% confidence interval).

## 340 5. Software and URLs

341 We have provided commands used to analyze the data described in this study in **Supplementary File 3**. We have  
342 also submitted phenotype, genotype and gene expression data from this study to GeneNetwork<sup>88</sup> (accession number  
343 in progress). Here we provide a list of the software we used for the analyses in this paper with the minimum version  
344 number and a brief description of how we used it.

### 345 5.1. R packages

346 All of the R packages below were run using **R v.3.1.0** or higher.

347  
348 **permute v.0.9-4**: permuted phenotypes and genotypes for significance thresholds  
349 **leaps v.2.9**: covariate selection for AIL phenotypes  
350 **SOFIA v.1.0**: automatic generation of files formatted for use in Circos software<sup>89</sup>  
351 **DEseq v.1.24.0**: processing RNA sequencing reads<sup>67</sup>  
352 **QTLRel v.0.2-15**: gene dropping simulations for HWE test<sup>84</sup>  
353 **HardyWeinberg v.1.5.6**: HWE test for AIL genotypes and gene dropping simulations<sup>85</sup>  
354 **GenomicAlignments v.1.8.4**: genome assembly for RNA-seq reads<sup>65</sup>  
355 **ggpubr v.0.1.5**; **ggplot2 v.2.2.1**<sup>90</sup>; **viridis v.0.4.0**; **VennDiagram v.1.6.17**<sup>91</sup>: plotting tools

### 356 5.2. Other software

357 **BWA v.0.7.5a**: sequencing read alignment<sup>92</sup>  
358 **GATK v.3.3.0**: base quality score recalibration and indel realignment<sup>51</sup>  
359 **GEMMA v.0.94**: QTL/eQTL mapping; heritability estimation; GRM calculation<sup>58,74,93</sup>

360 **PLINK v.1.9**: genotype file processing; LD pruning<sup>57</sup>  
361 **ANGSD v.0.912**: genotype likelihoods/variant calling<sup>52</sup>  
362 **Beagle v.4.1**: genotype imputation<sup>53,56</sup>  
363 **IBDLD v.3.34**: pedigree error checking<sup>54,55</sup>  
364 **HISAT v.0.1.6**: RNA-seq read alignment<sup>64</sup>  
365 **Circos v.0.69-5**: eQTL Fig.s<sup>94</sup>  
366 **CASAVA v.1.6**: demultiplexing RNA-seq reads (Illumina, San Diego, USA)  
367 **MultiTrans (no version number)** and **SLIDE v.1.0.4**: QTL significance thresholds<sup>59,60</sup>  
368 **bcftools v.1.3**; **picard-tools v.1.92**; **samtools v.1.2 (Li2009)**: file formatting; summary statistics

## 369 5.3 URLs

370 **BreedAIL.R**; R script to select AIL breeders  
371 <https://github.com/pcarbo/breedail>  
372 **dbSNP v.142 data**; SNP annotation and rsids (file: snp142.txt.gz)  
373 <http://hgdownload.cse.ucsc.edu/goldenPath/mm10/database/>  
374 **Ensembl**; gene coordinates, transcript and regulatory annotations  
375 [http://www.ensembl.org/Mus\\_musculus/Info/Index](http://www.ensembl.org/Mus_musculus/Info/Index)  
376 **JAX Mouse Map Converter**; bp to cM conversion for genetic map  
377 <http://cgd.jax.org/mousemapconverter/>  
378 **Mouse Genome Informatics (MGI)**; gene-level queries  
379 <http://www.informatics.jax.org/>  
380 **UCSC Genome Browser**; mm10 reference genome, gene and SNP information, liftOver  
381 <http://genome.ucsc.edu/cgi-bin/hgGateway>  
382

383  
384  
385  
386  
387  
388  
389  
390  
391  
392  
393  
394  
395  
396  
397  
398  
399  
400  
401  
402  
403  
404  
405  
406  
407  
408  
409  
410  
411  
412  
413  
414  
415  
416  
417  
418  
419  
420  
421  
422  
423  
424  
425  
426  
427  
428  
429

## 6. Supplementary references

71. Heidbreder, C. Advances in animal models of drug addiction. *Curr. Top. Behav. Neurosci.* **7**, 213–250 (2011).
72. Vezina, P. & Leyton, M. Conditioned cues and the expression of stimulant sensitization in animals and humans. *Neuropharmacology* **56 Suppl 1**, 160–168 (2009).
73. Hrbek, T., de Brito, R. A., Wang, B., Pletscher, L. S. & Cheverud, J. M. Genetic characterization of a new set of recombinant inbred lines (LGXSM) formed from the inter-cross of SM/J and LG/J inbred mouse strains. *Mamm. Genome Off. J. Int. Mamm. Genome Soc.* **17**, 417–429 (2006).
74. Zhou, X., Carbonetto, P. & Stephens, M. Polygenic modeling with bayesian sparse linear mixed models. *PLoS Genet.* **9**, e1003264 (2013).
75. Wahlsten, D., Metten, P. & Crabbe, J. C. A rating scale for wildness and ease of handling laboratory mice: results for 21 inbred strains tested in two laboratories. *Genes Brain Behav.* **2**, 71–79 (2003).
76. Bloemberg, D. & Quadrilatero, J. Rapid determination of myosin heavy chain expression in rat, mouse, and human skeletal muscle using multicolor immunofluorescence analysis. *PloS One* **7**, e35273 (2012).
77. Messina, G. & Cossu, G. The origin of embryonic and fetal myoblasts: a role of Pax3 and Pax7. *Genes Dev.* **23**, 902–905 (2009).
78. Toker, L., Feng, M. & Pavlidis, P. Whose sample is it anyway? Widespread misannotation of samples in transcriptomics studies. *F1000Research* **5**, 2103 (2016).
79. Bimber, B. N. *et al.* Whole-genome characterization in pedigreed non-human primates using genotyping-by-sequencing (GBS) and imputation. *BMC Genomics* **17**, (2016).
80. Marchini, J. & Howie, B. Genotype imputation for genome-wide association studies. *Nat. Rev. Genet.* **11**, 499–511 (2010).
81. Huang, L., Wang, C. & Rosenberg, N. A. The relationship between imputation error and statistical power in genetic association studies in diverse populations. *Am. J. Hum. Genet.* **85**, 692–698 (2009).
82. Li, H. A statistical framework for SNP calling, mutation discovery, association mapping and population genetical parameter estimation from sequencing data. *Bioinforma. Oxf. Engl.* **27**, 2987–2993 (2011).
83. Cox, A. *et al.* A new standard genetic map for the laboratory mouse. *Genetics* **182**, 1335–1344 (2009).
84. Cheng, R., Abney, M., Palmer, A. A. & Skol, A. D. QTLRel: an R package for genome-wide association studies in which relatedness is a concern. *BMC Genet.* **12**, 66 (2011).
85. Graffelman, J. Exploring Diallelic genetic markers: The Hardy Weinberg package. *J. Stat. Softw.* **64**, 1–23 (2015).
86. Abney, M. Permutation testing in the presence of polygenic variation. *Genet. Epidemiol.* **39**, 249–258 (2015).
87. Cheng, R. & Palmer, A. A. A simulation study of permutation, bootstrap, and gene dropping for assessing statistical significance in the case of unequal relatedness. *Genetics* **193**, 1015–1018 (2013).
88. Mulligan, M. K., Mozhui, K., Prins, P. & Williams, R. W. GeneNetwork: A Toolbox for Systems Genetics. *Methods Mol. Biol. Clifton NJ* **1488**, 75–120 (2017).
89. Diaz-Garcia, L., Covarrubias-Pazaran, G., Schlautman, B. & Zalapa, J. SOFIA: an R package for enhancing genetic visualization with Circos. *bioRxiv* 088377 (2016). doi:10.1101/088377
90. Wickham, H. Ggplot2 : elegant graphics for data analysis. (2009). Available at: <http://public.eblib.com/choice/publicfullrecord.aspx?p=511468>.
91. Chen, H. & Boutros, P. C. VennDiagram: a package for the generation of highly-customizable Venn and Euler diagrams in R. *BMC Bioinformatics* **12**, 35 (2011).
92. Li, H. & Durbin, R. Fast and accurate long-read alignment with Burrows-Wheeler transform. *Bioinforma. Oxf. Engl.* **26**, 589–595 (2010).
93. Zhou, X. A unified framework for variance component estimation with summary statistics in genome-wide association studies. *Ann. Appl. Stat.* **In press**, (2017).
94. Krzywinski, M. *et al.* Circos: an information aesthetic for comparative genomics. *Genome Res.* **19**, 1639–1645 (2009).

430  
431

## Supplementary Figures

Supplementary figures 1-20 are included in the following pages.

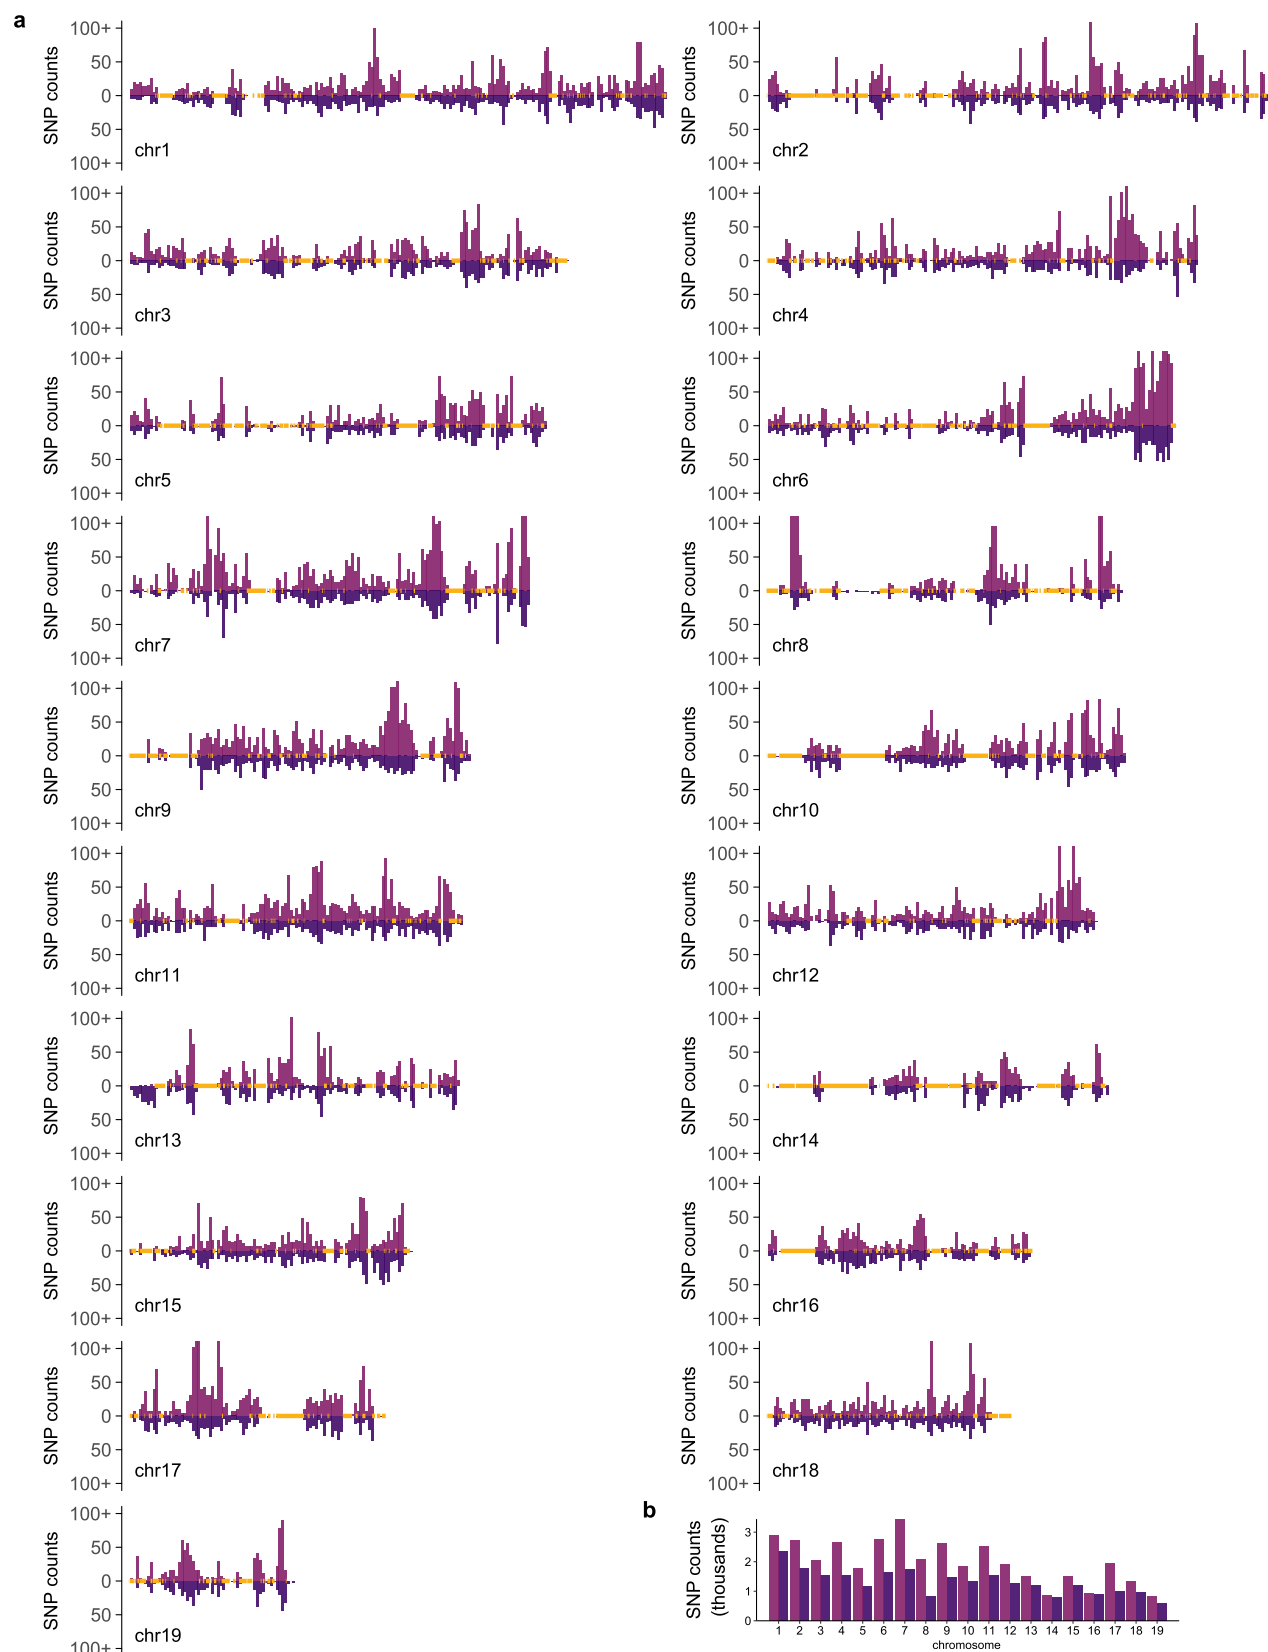

Figure 1: **SNPs obtained using GBS and GigaMUGA.** (a) Histograms showing the distribution of GBS SNPs before reference panel imputation (top, light purple), and GigaMUGA SNPs (bottom, dark purple) that overlap known SNPs segregating in LG and SM. SNPs are plotted in 1 Mb bins for each autosome. At the x-axes, regions predicted by Nikolskiy *et al.* (ref. 13) to be nearly IBD in LG and SM are marked in gold. (b) Histogram showing the total number of known SNPs segregating in LG and SM that were captured using GBS before reference panel imputation (light purple) and GigaMUGA (dark purple).

Figure 2: **Manhattan plots.** (a-r) Manhattan plots are grouped by trait. The dashed line in each panel indicates a permutation-derived significance threshold of  $p = 8.06 \times 10^{-6}$  ( $\alpha = 0.05$ ). The top SNP for each locus is marked and labeled with its rsid (dbSNP v.142). SNP heritability (proportion of variance explained by 523,028 SNPs used for GWAS) and standard error are shown in the upper right corner of each panel. (a) body weight measured on D1-D8 of the CPP test. (b) body weight measured after the CPP test. (c) hind limb muscle weights. (d) startle and habituation. (e) PPI (prepulse intensities are expressed in absolute terms (e.g. 82 dB = 12 dB over the 70 dB background)). (f) CPP on D8 (number of seconds spent on the methamphetamine-paired side of the testing chamber after conditioning). (g) CPP on D1 (number of seconds spent on the methamphetamine-paired side of the testing chamber before conditioning). (h) CPP defined as the difference in CPP between D8 and D1 (D8-D1). (i) methamphetamine-induced activity (distance traveled) on D2. (j) methamphetamine-induced activity (distance traveled) on D4. (k) locomotor sensitization to methamphetamine (distance traveled on D4 - D2). (l) saline-induced activity (side changes) on D1. (m) saline-induced activity (side changes) on D8. (n) saline-induced activity (distance traveled) on D3. (o) saline-induced activity (distance traveled) on D5. (p) saline-induced activity (distance traveled) on D1. (q) saline-induced activity (distance traveled) on D8. (r) fasting glucose levels, bone length and wildness.

**a**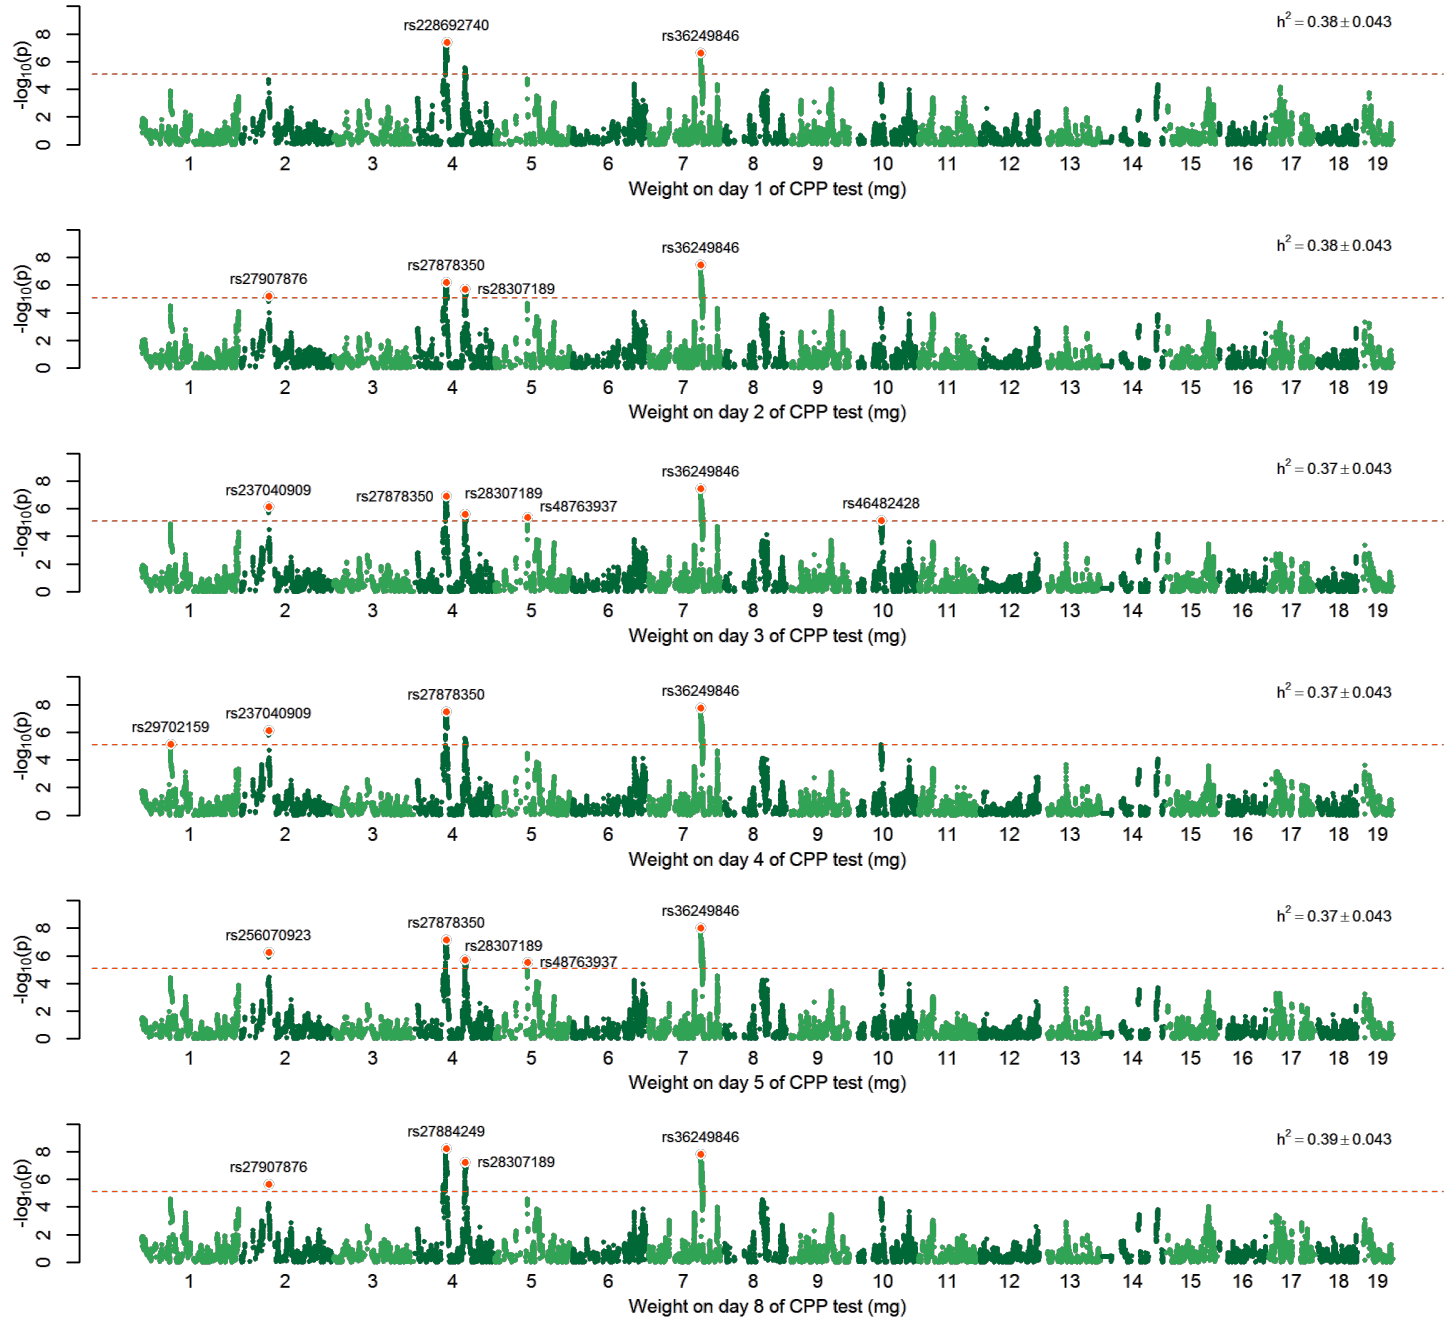



**b**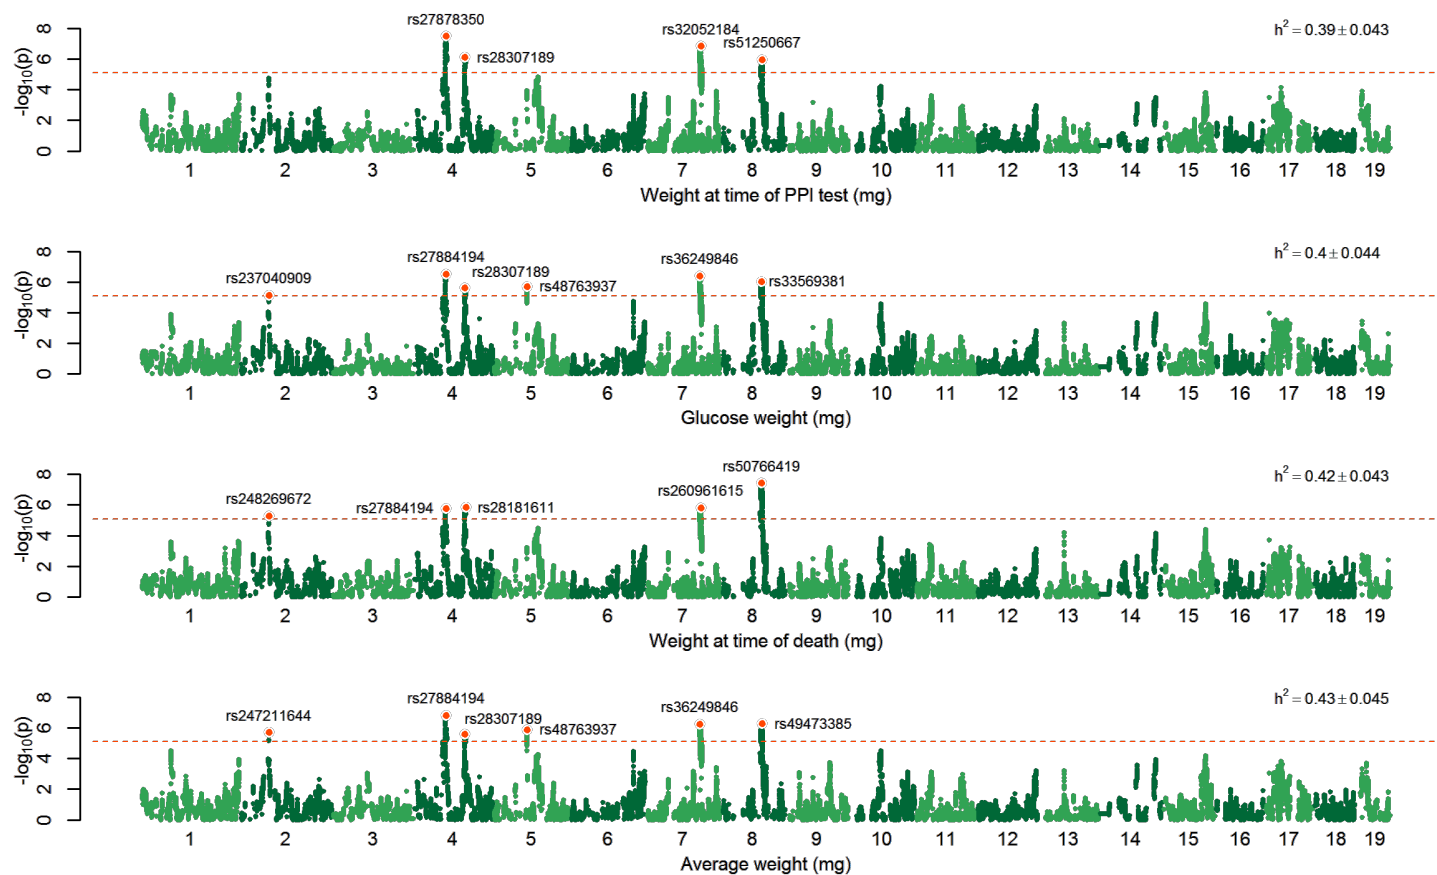

**c**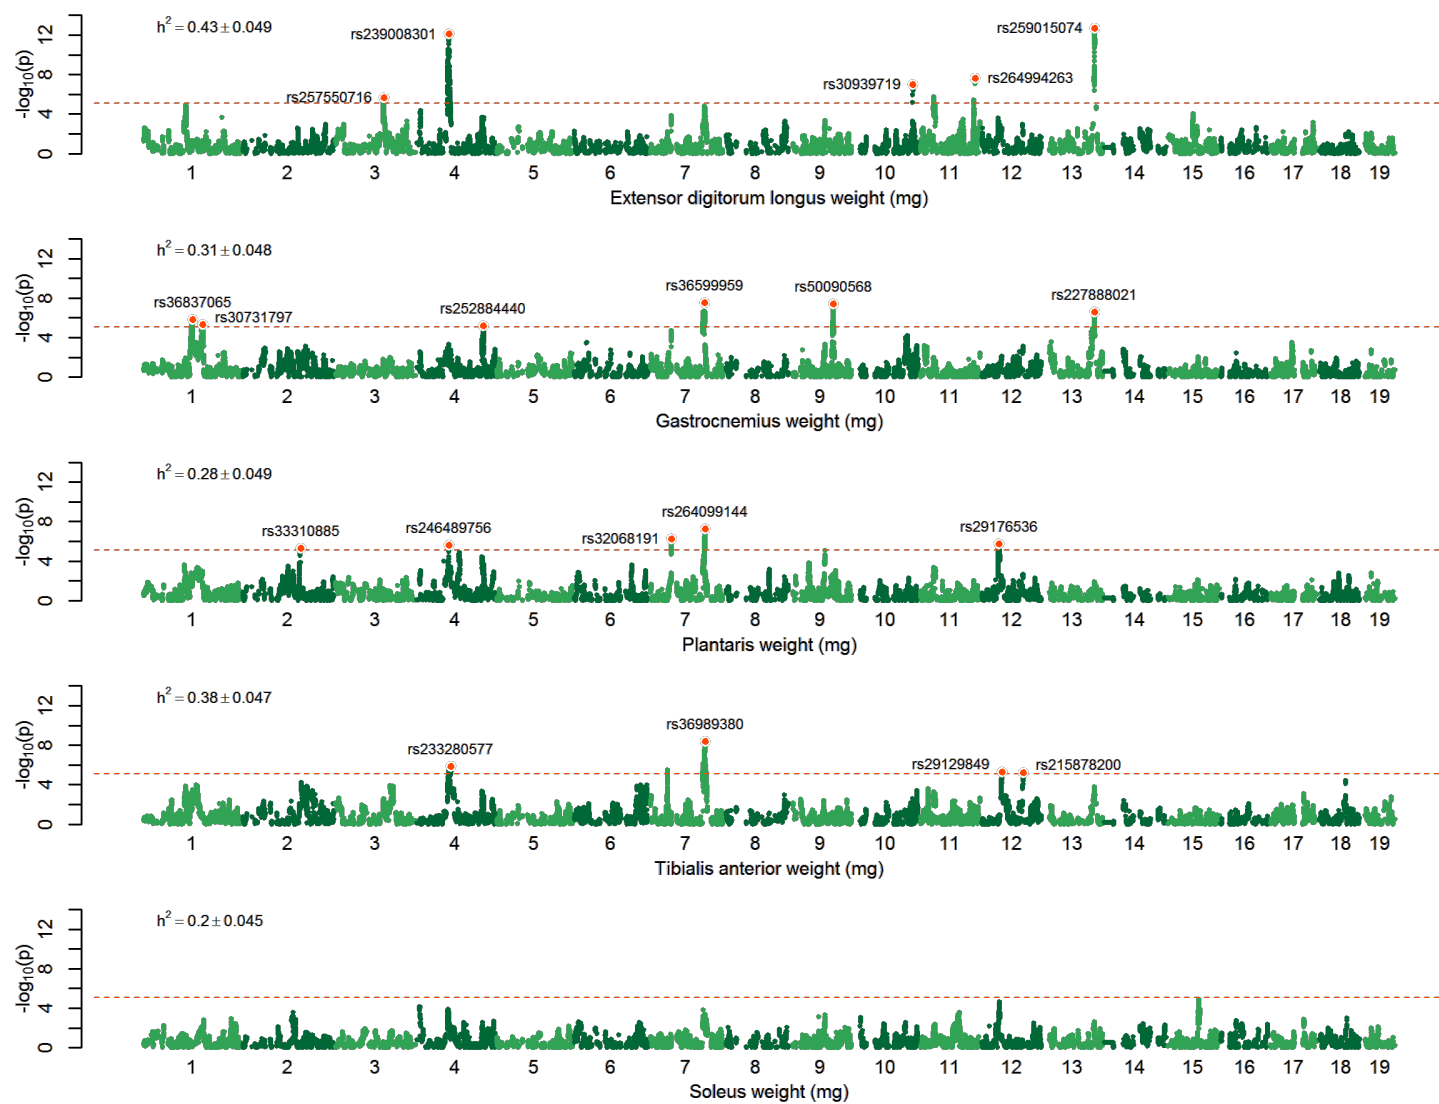

**d**

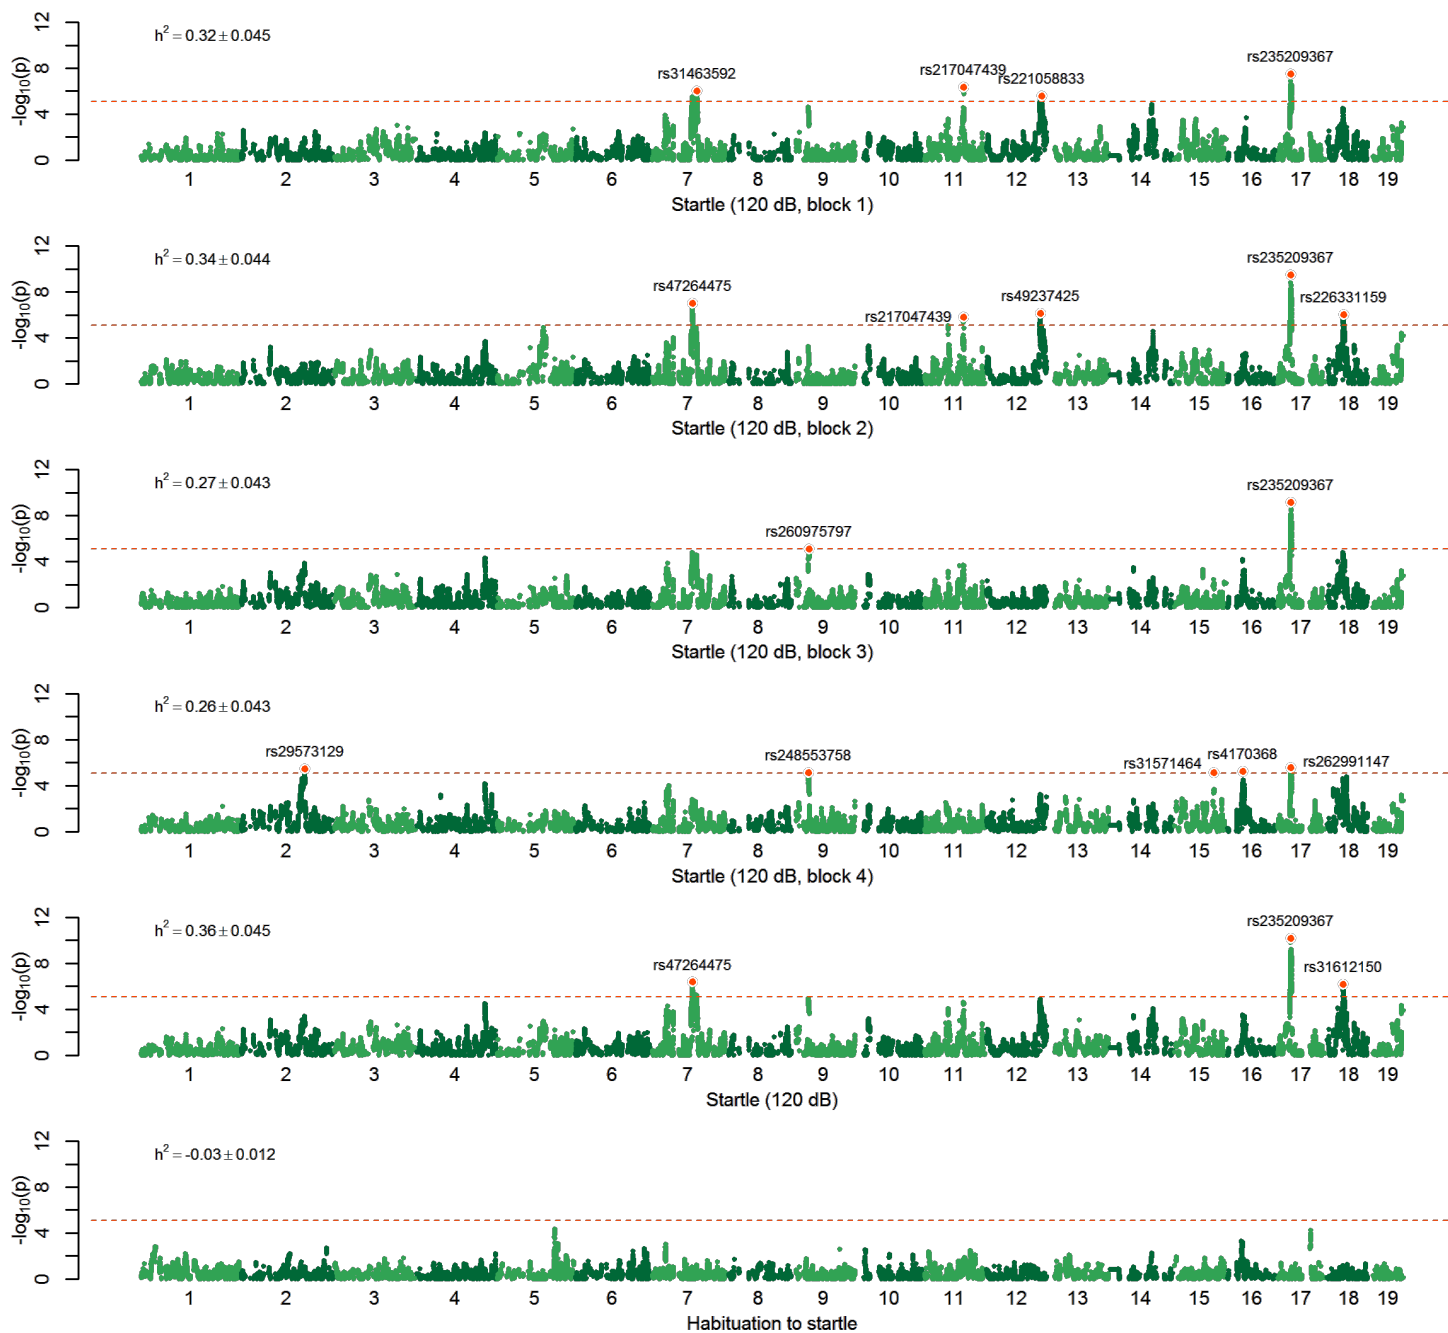

**e**

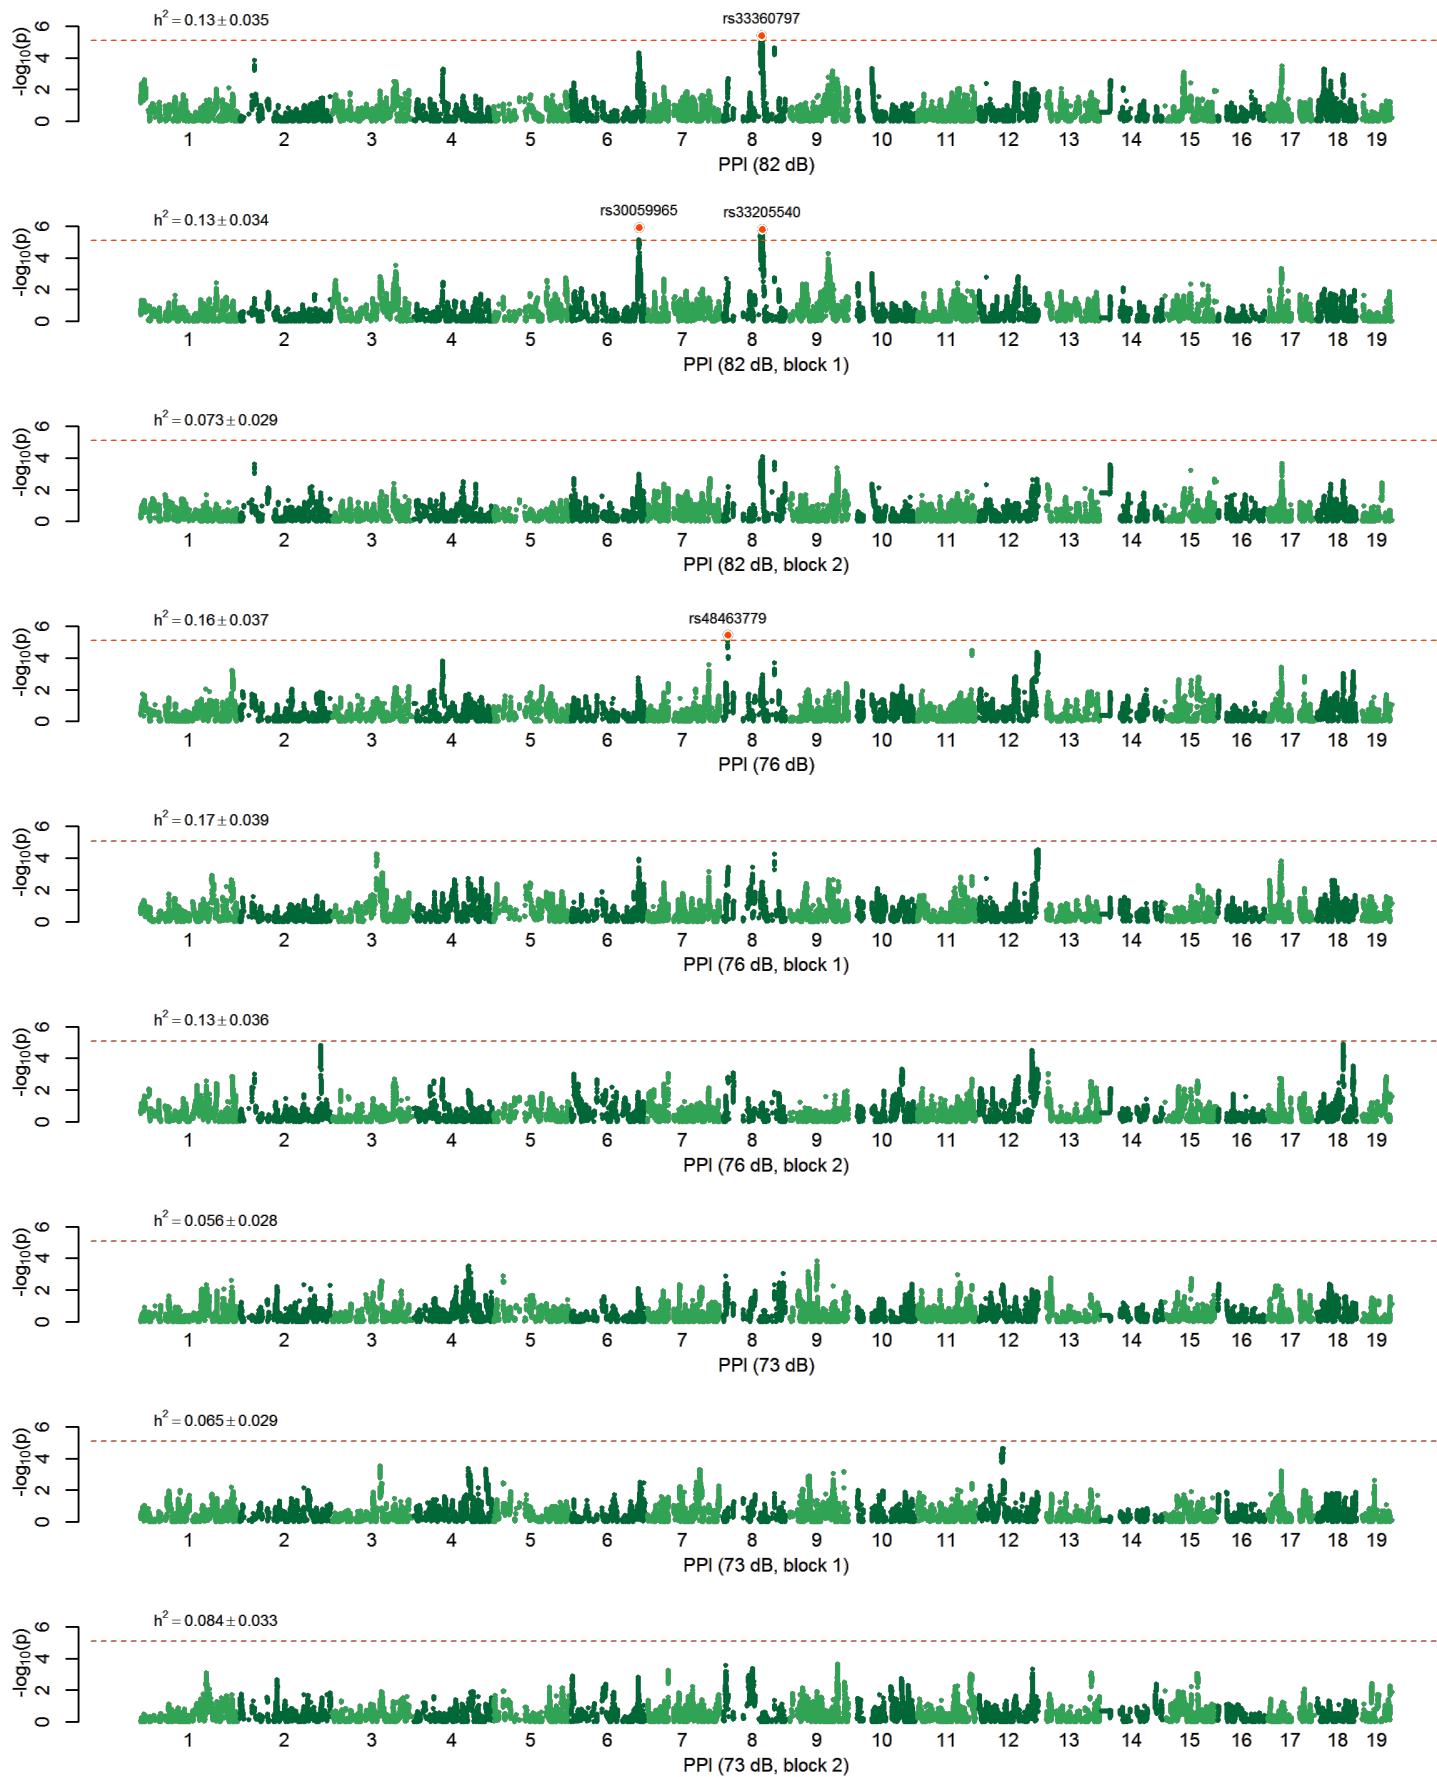

**g**

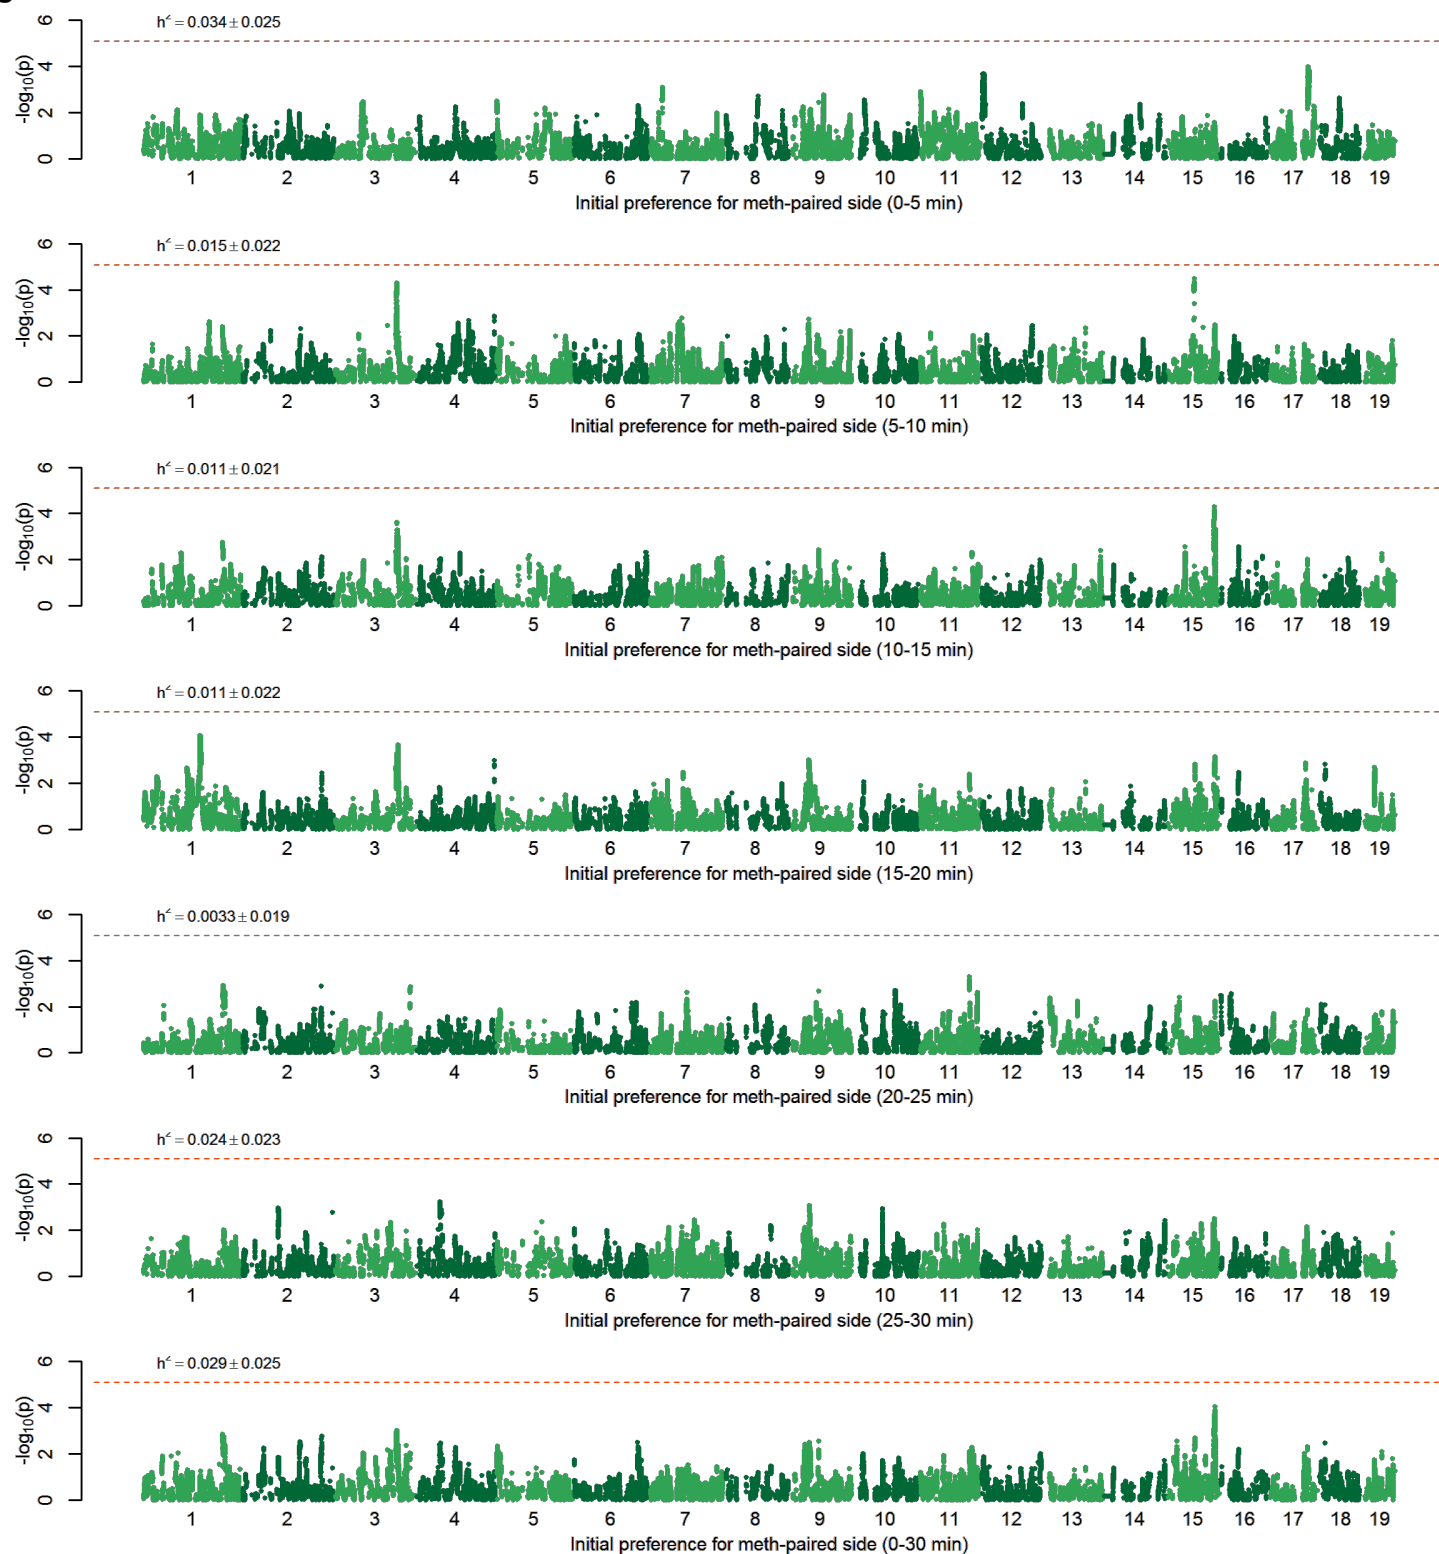

**f**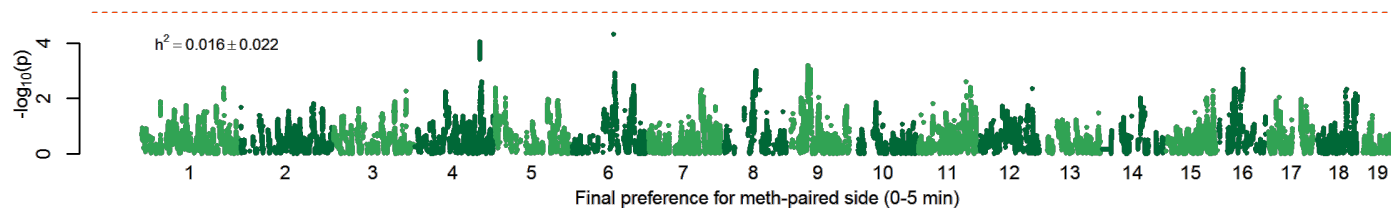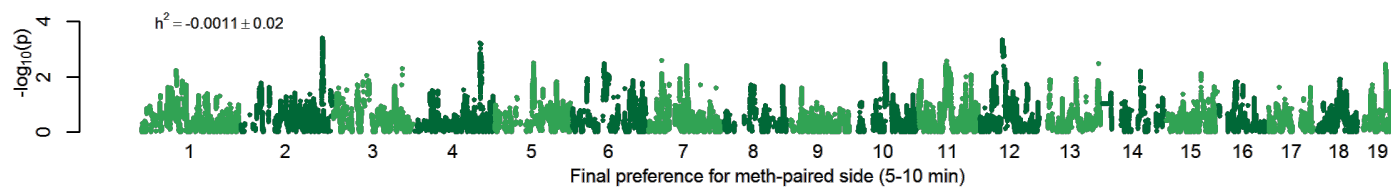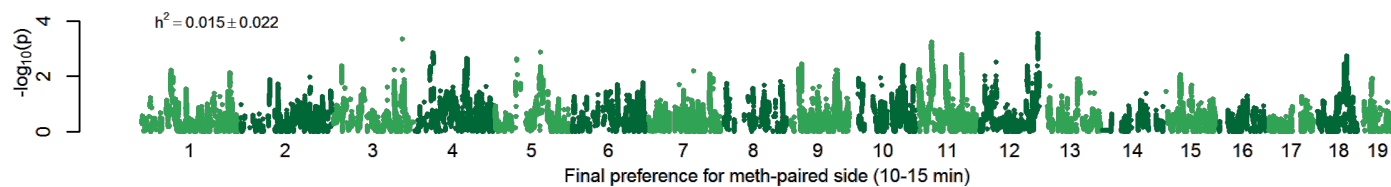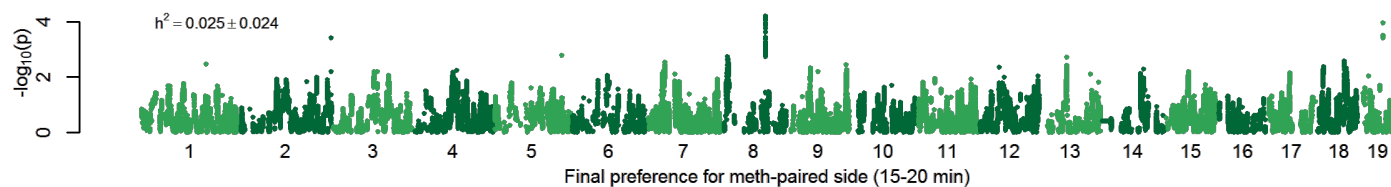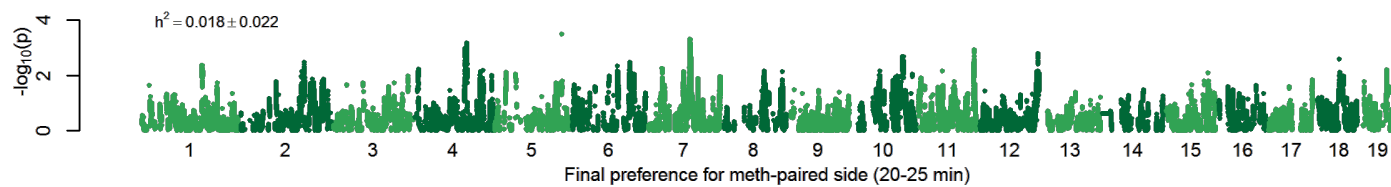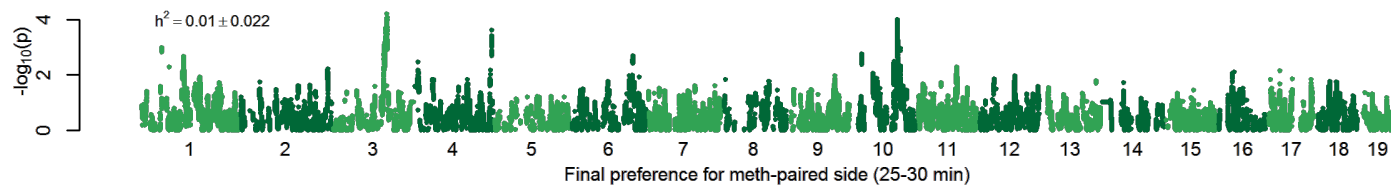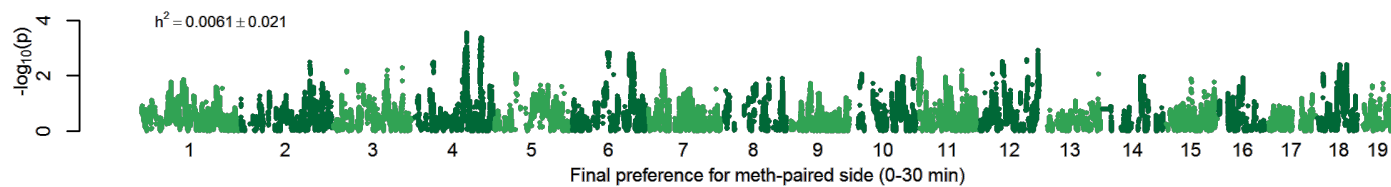

**h**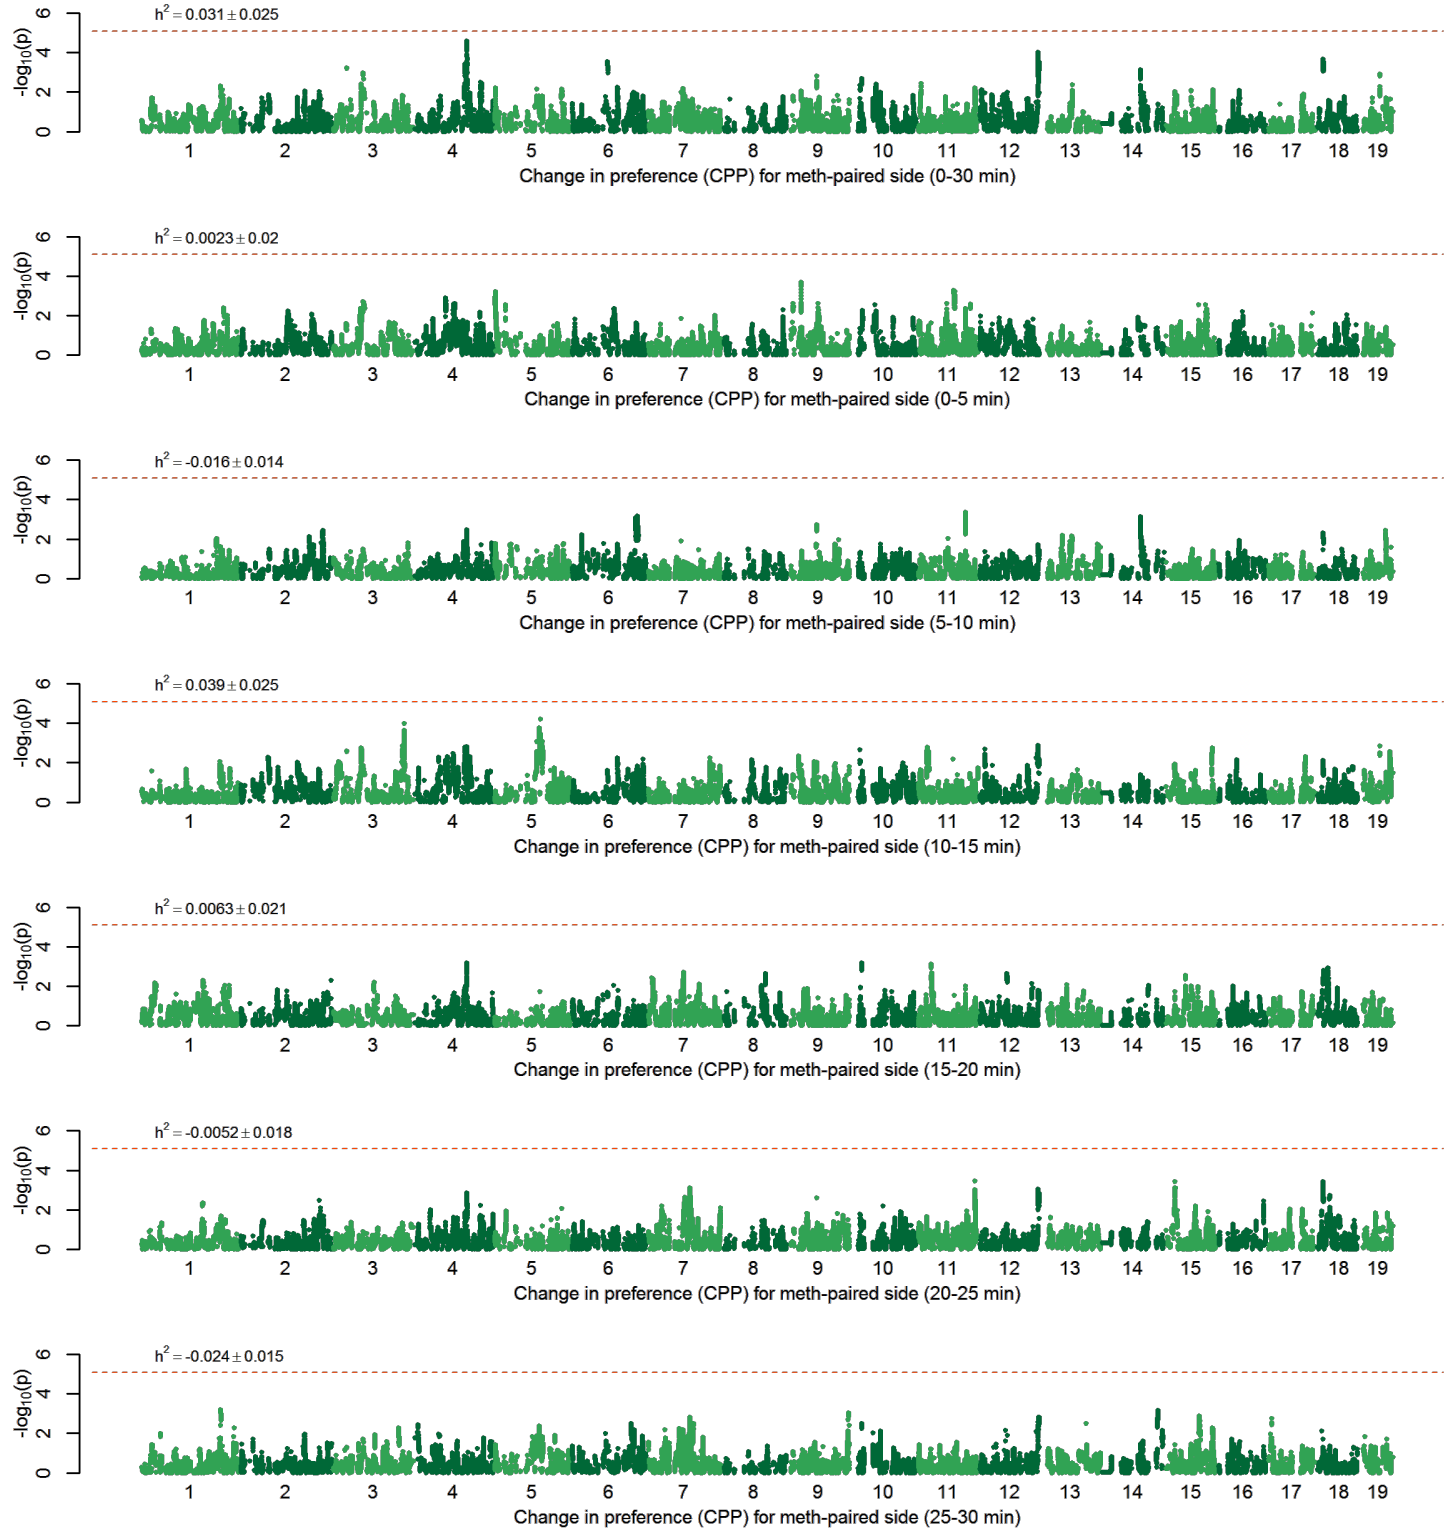

i

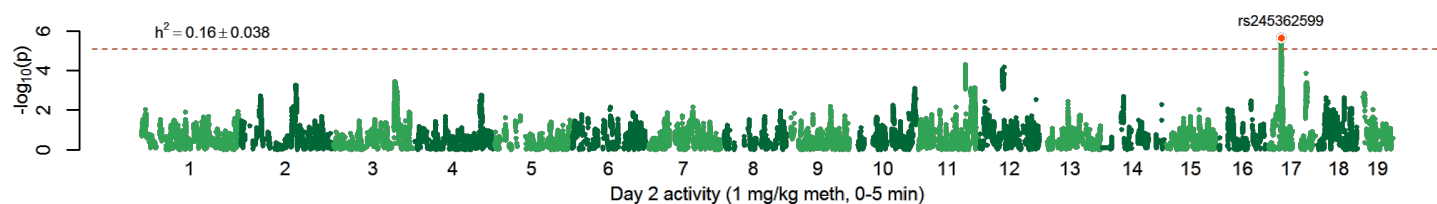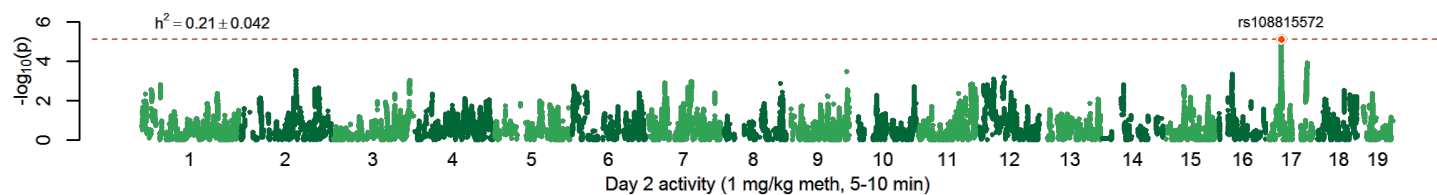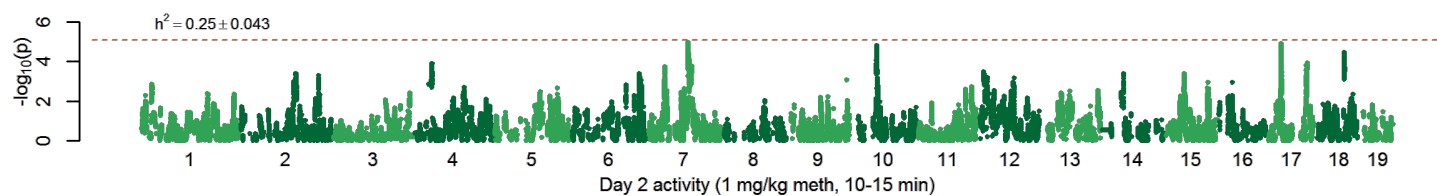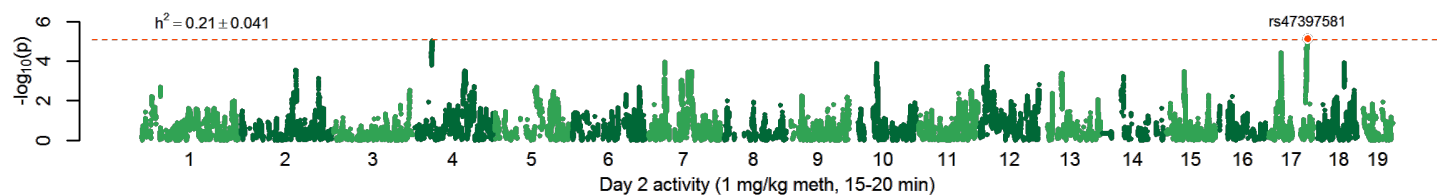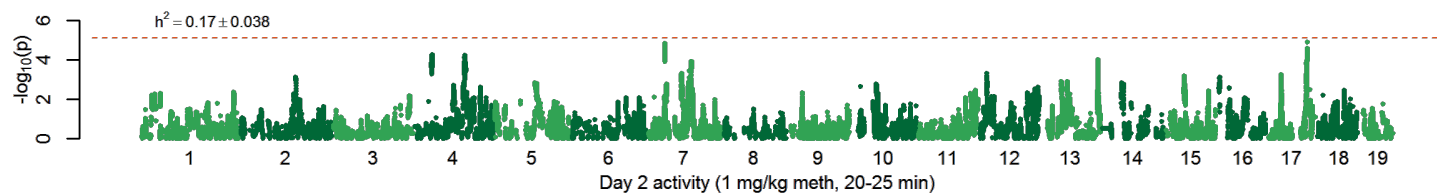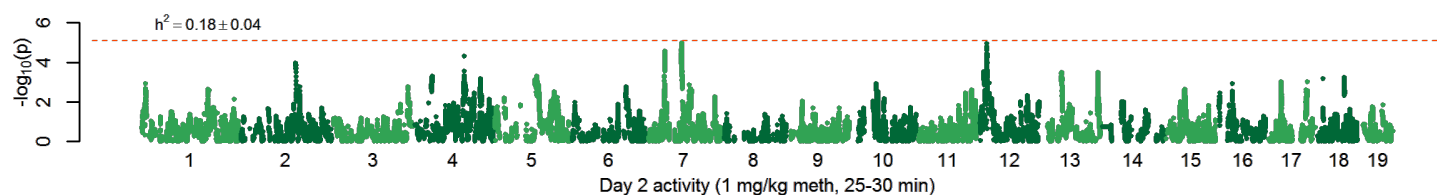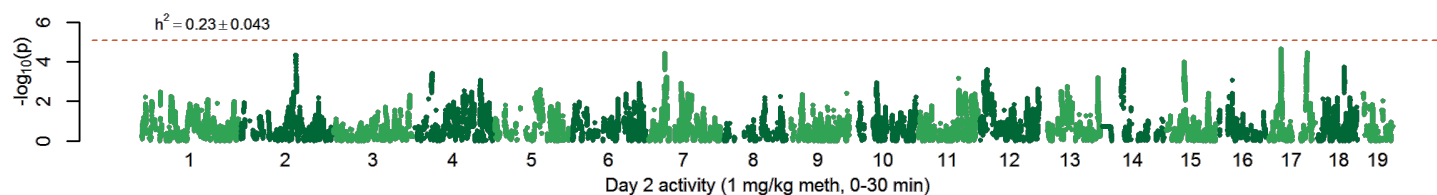



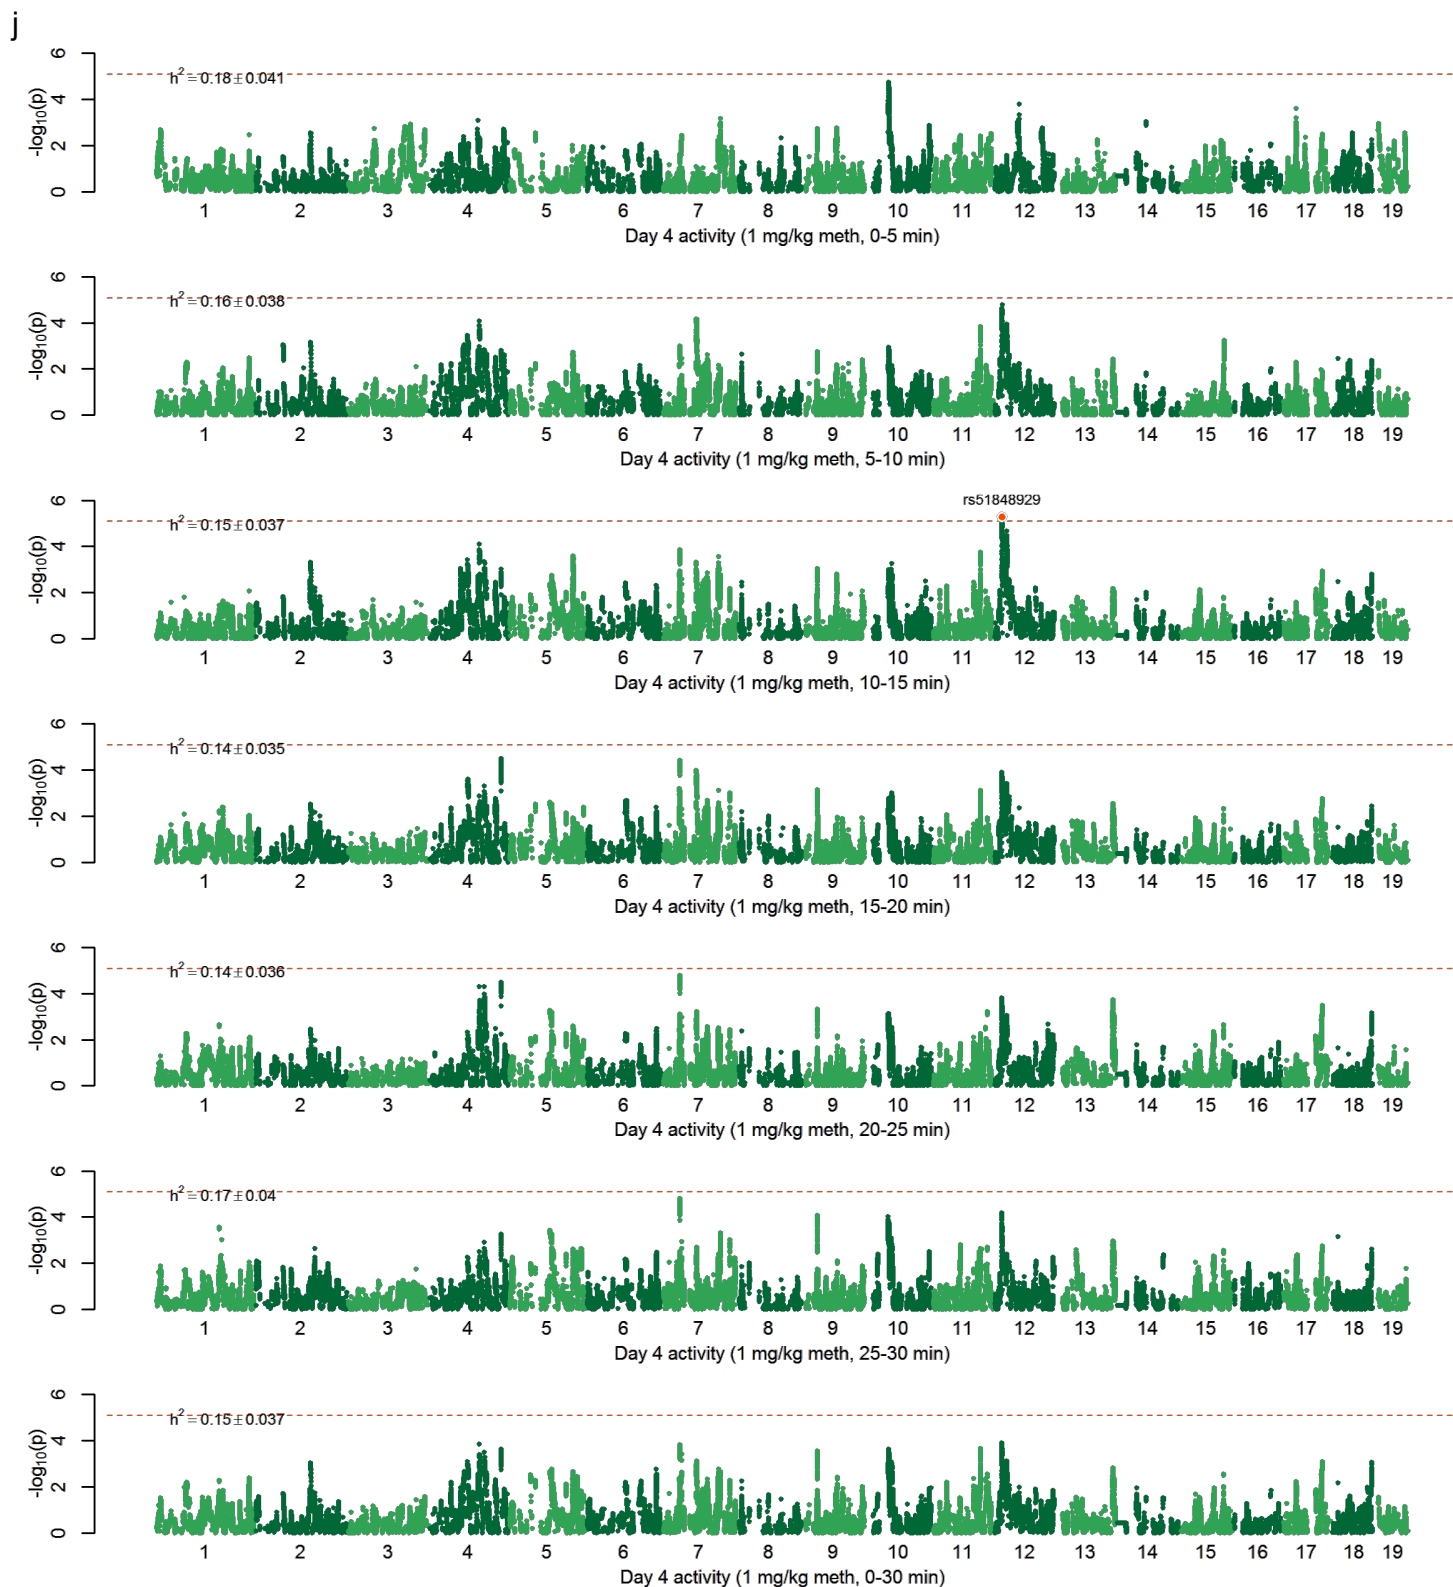

**k**

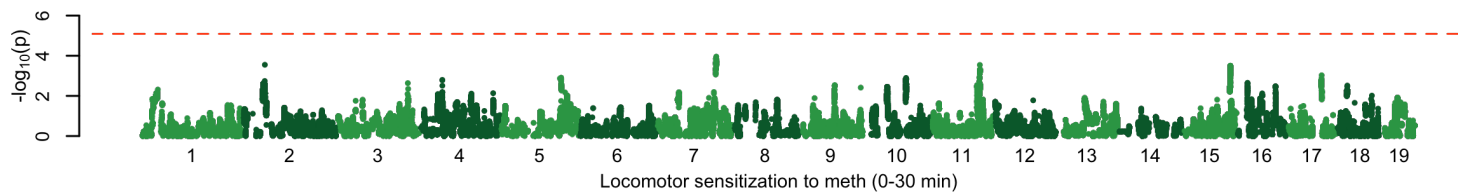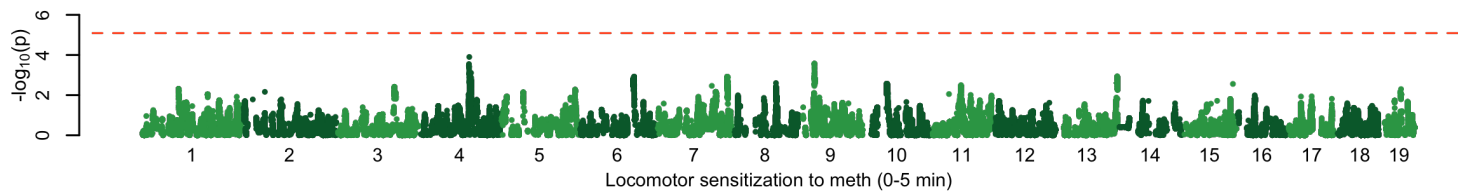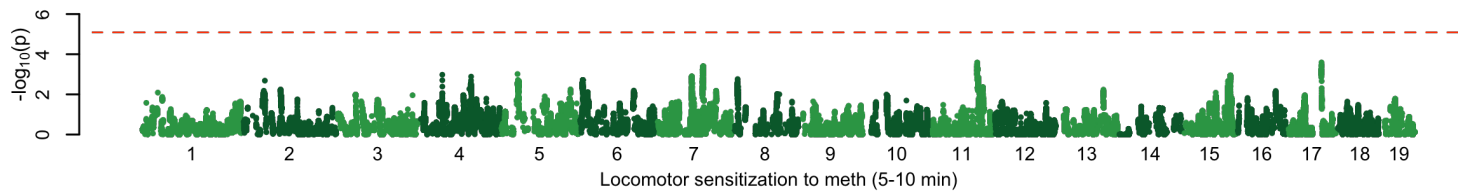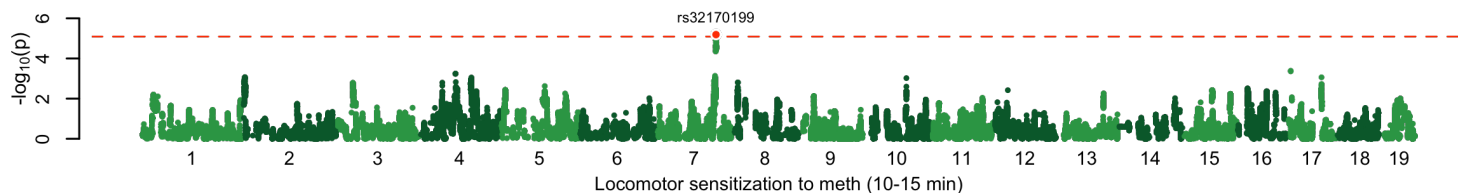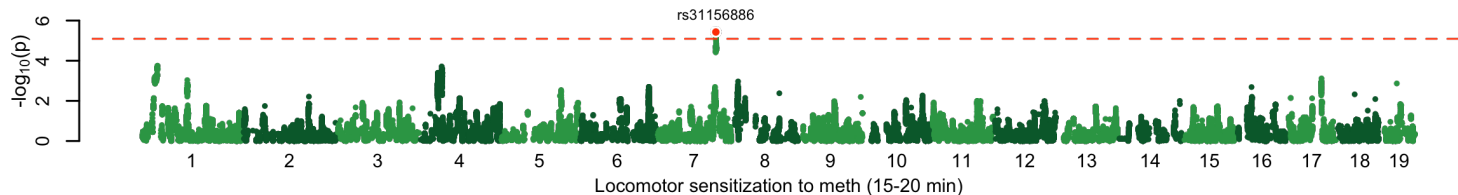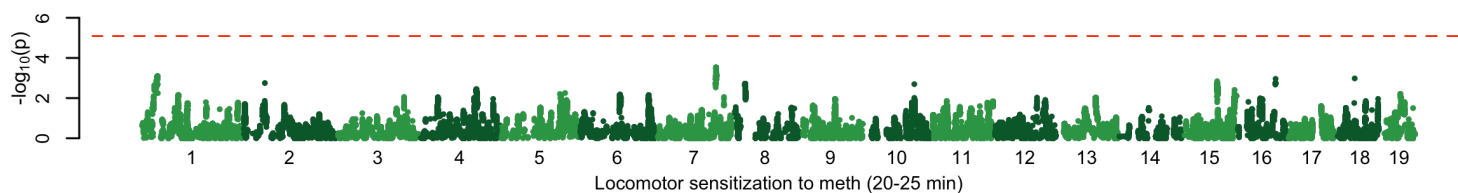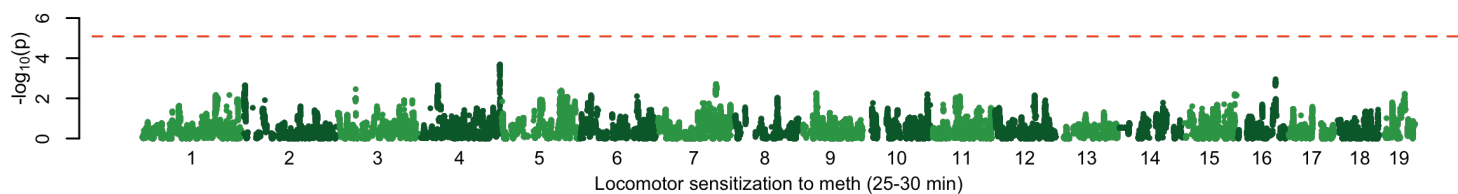

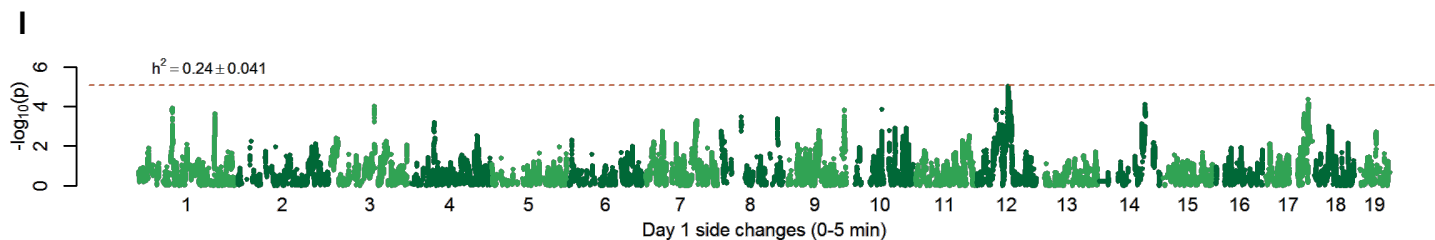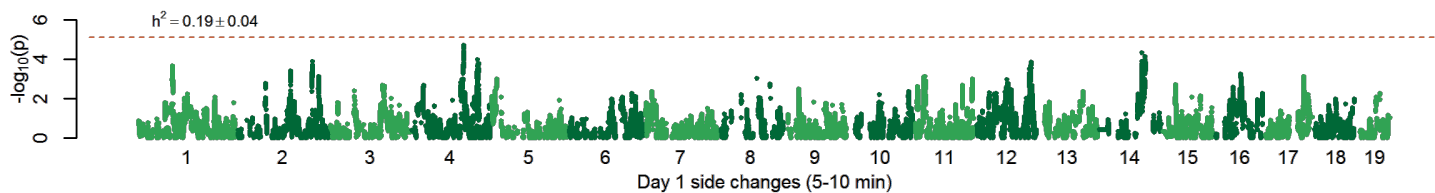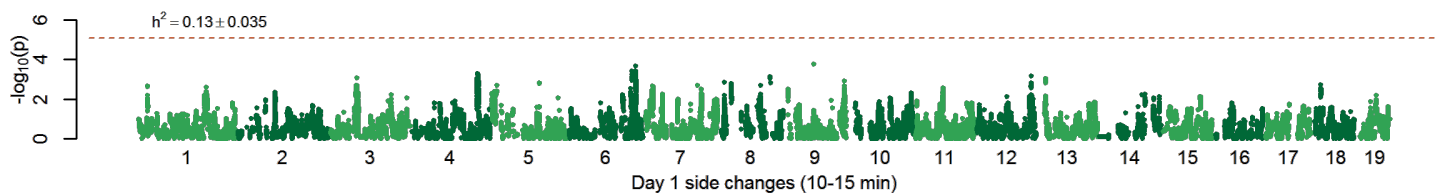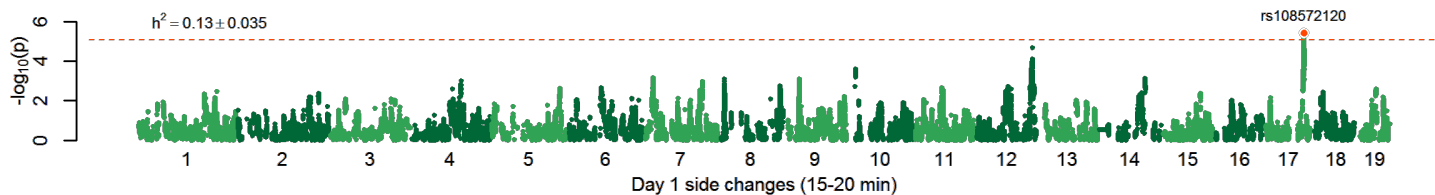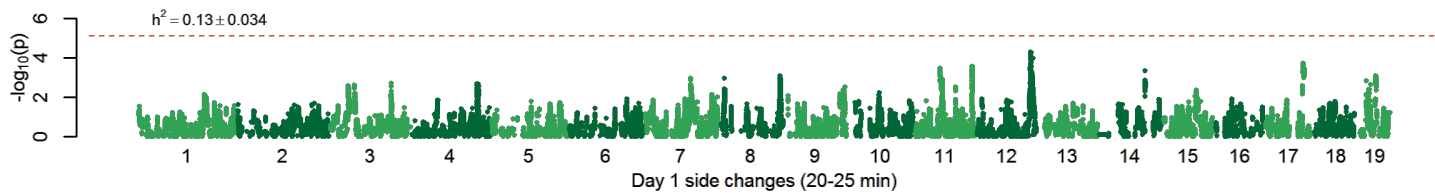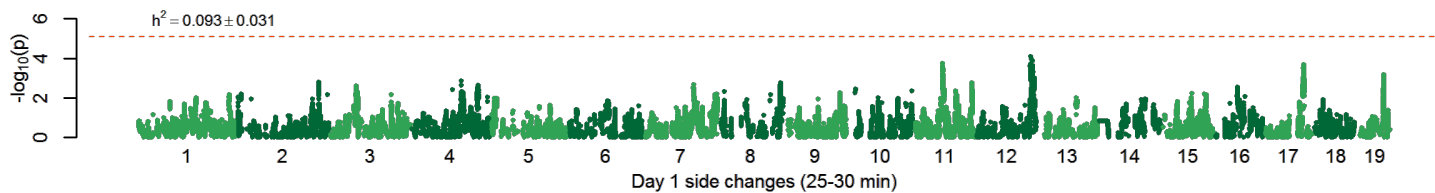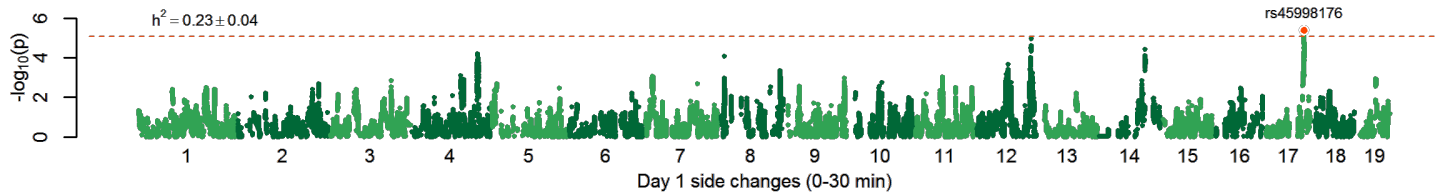

m

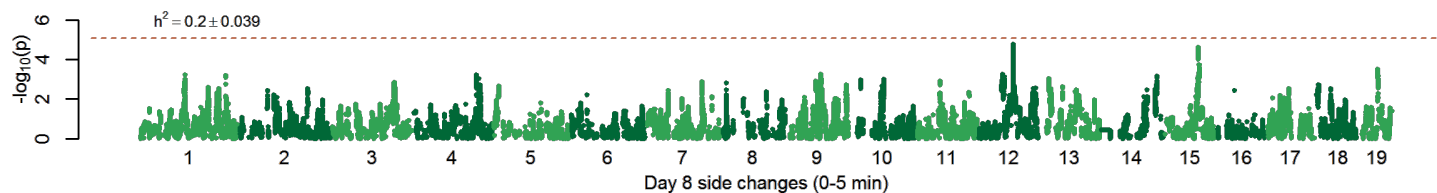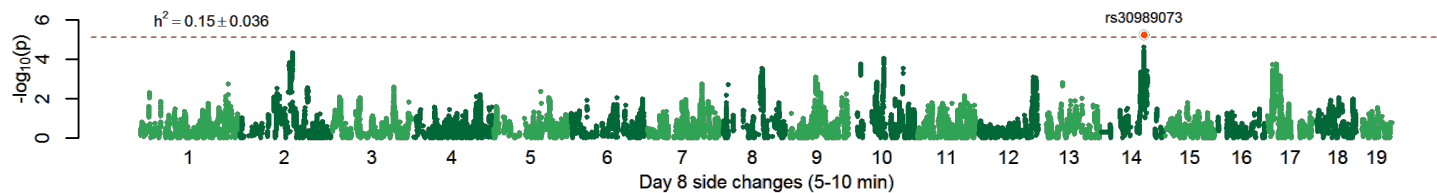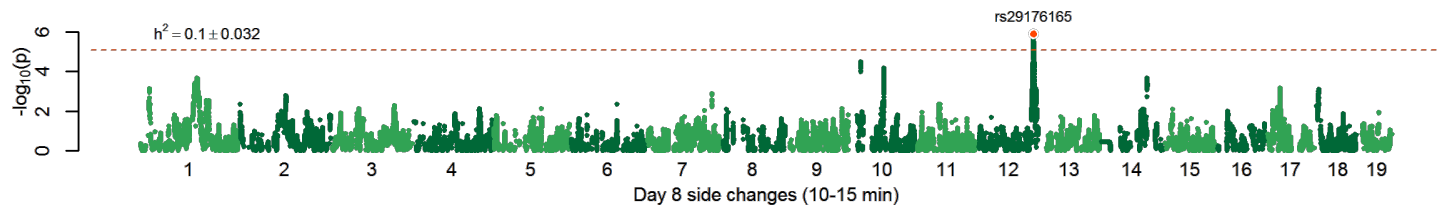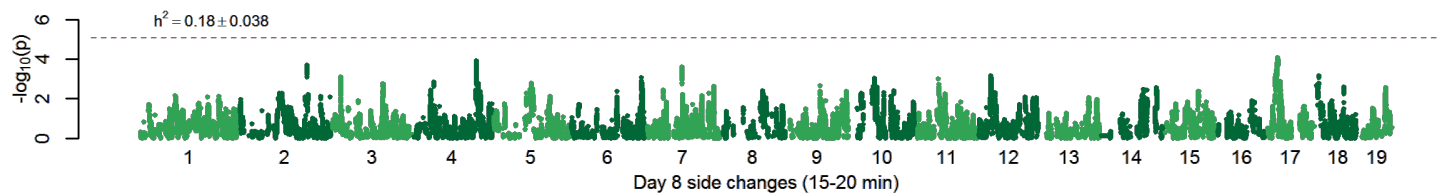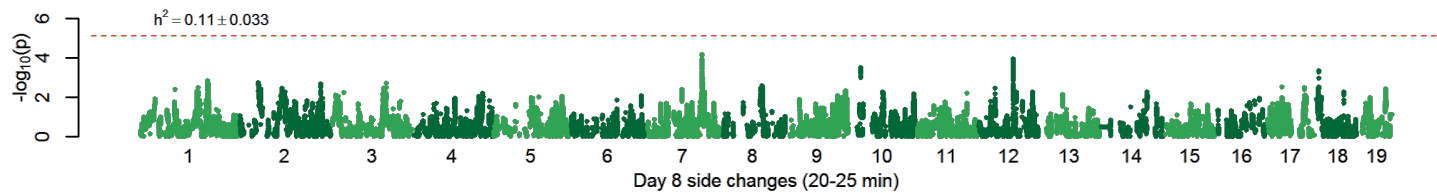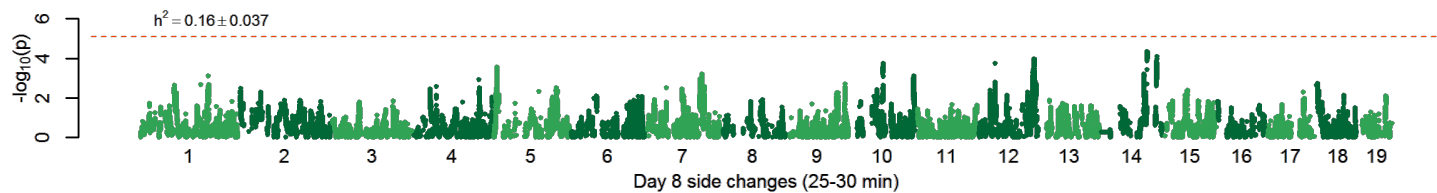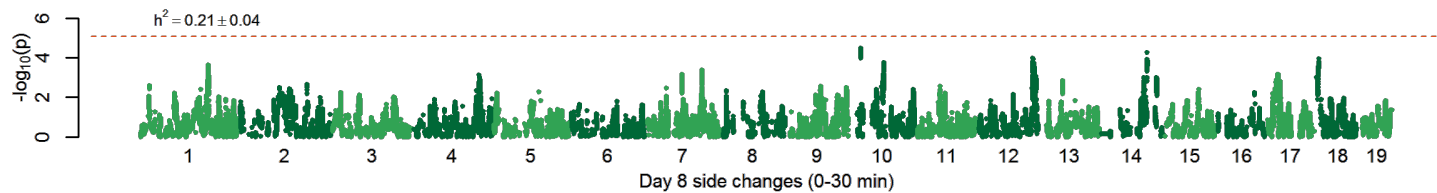

n

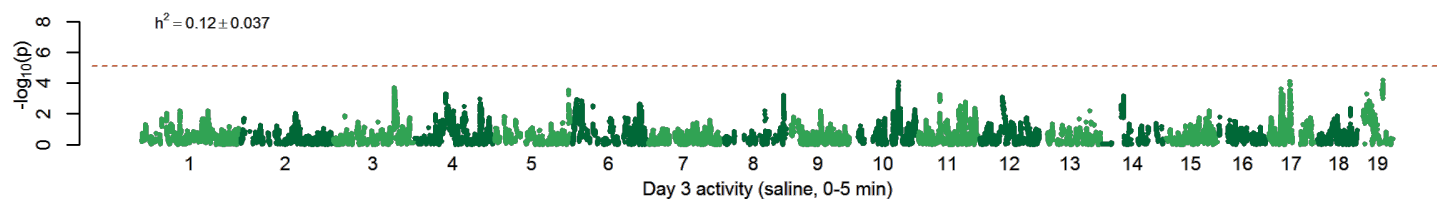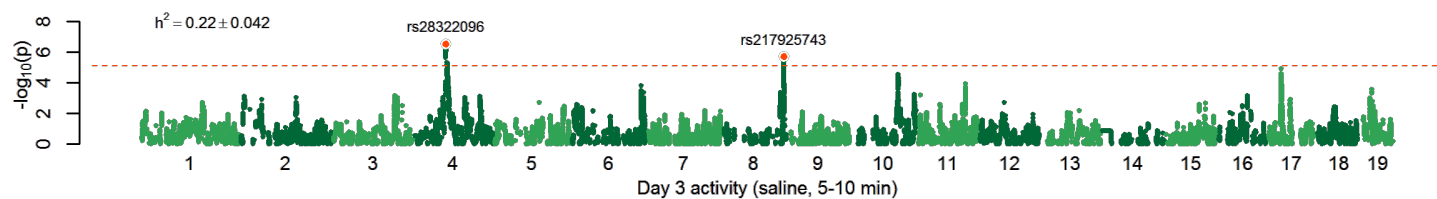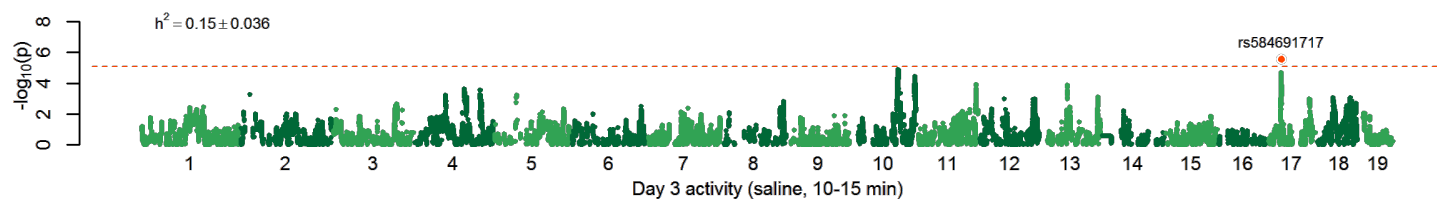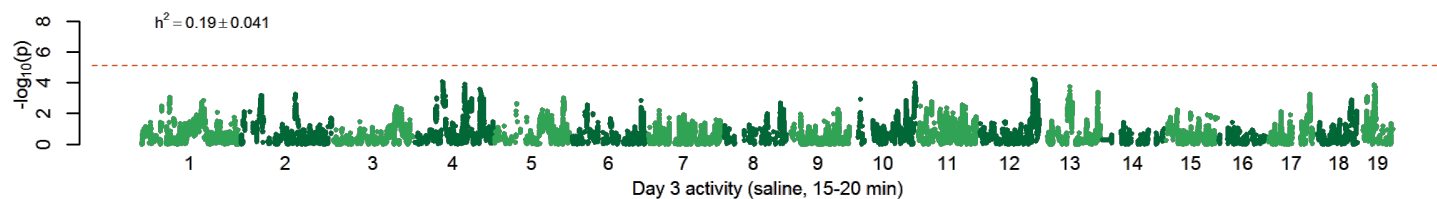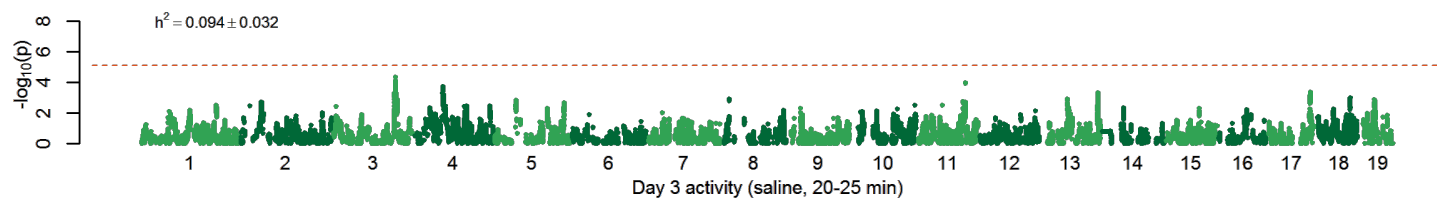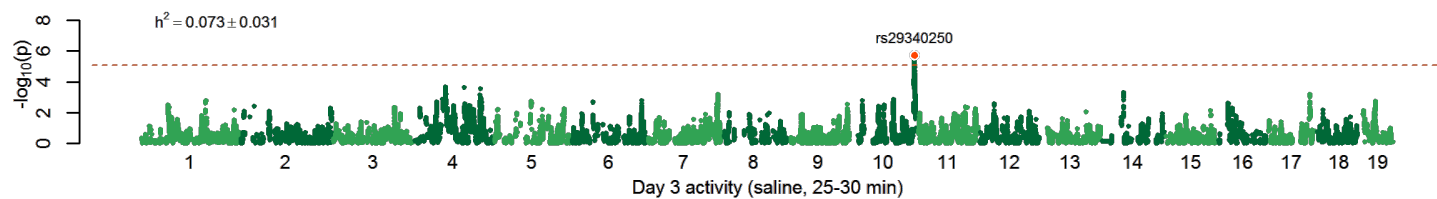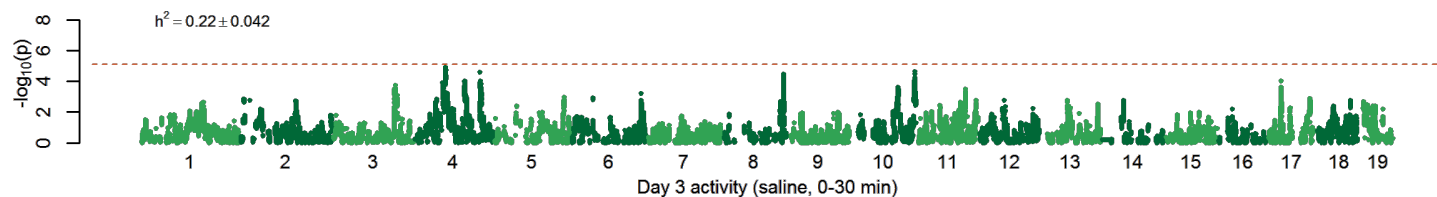

O

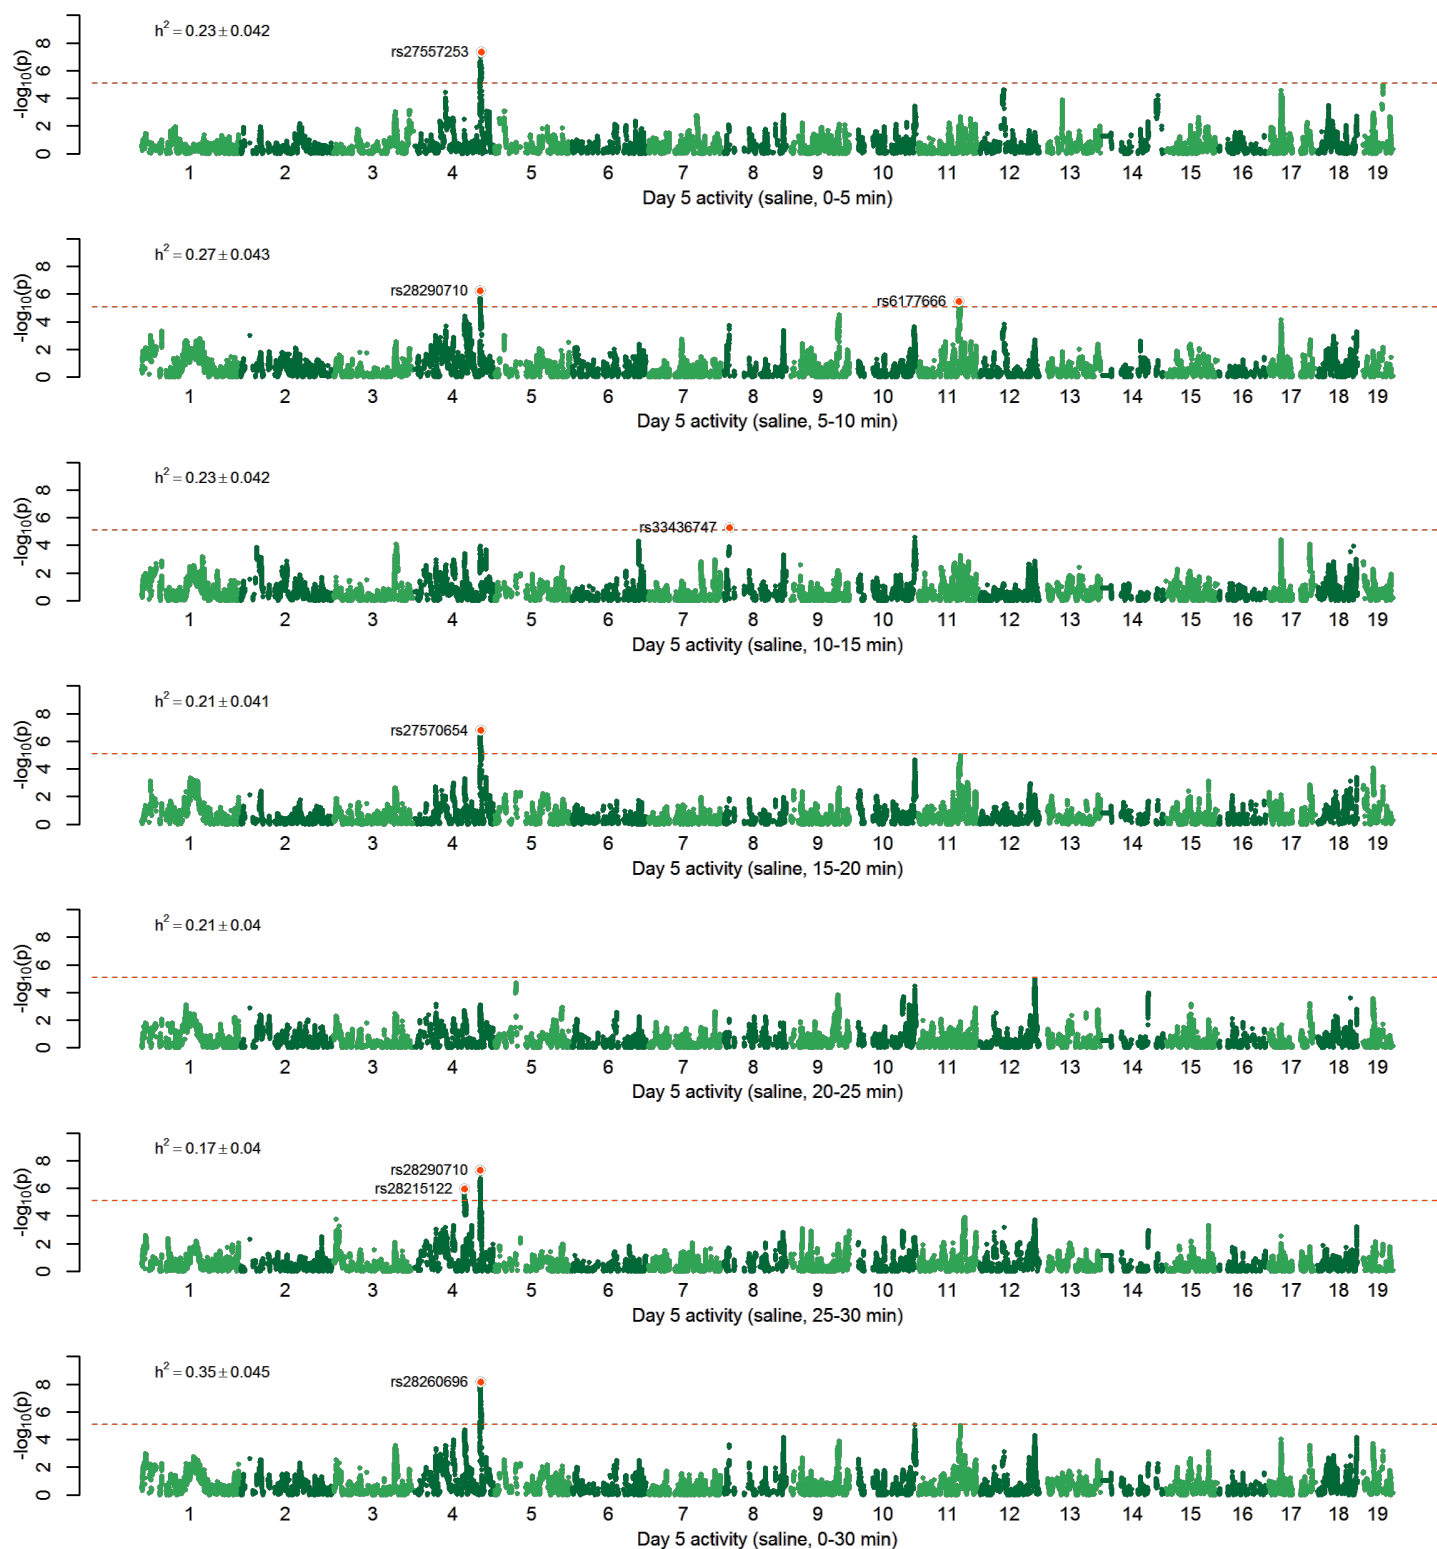

**p**

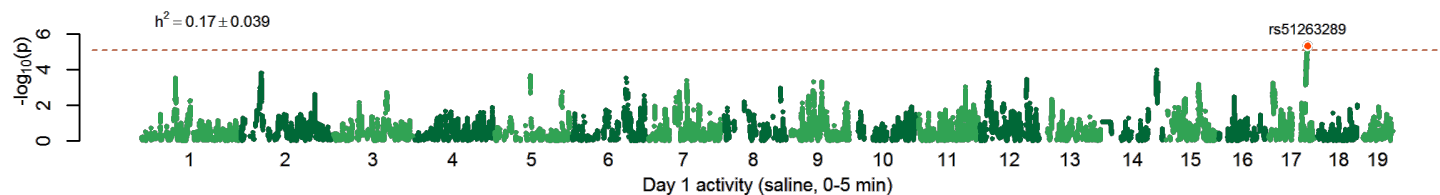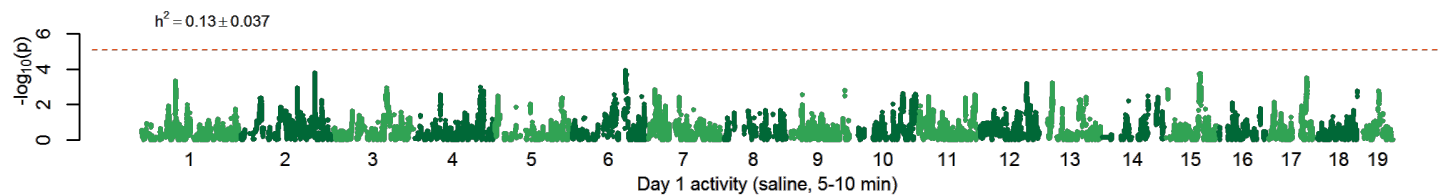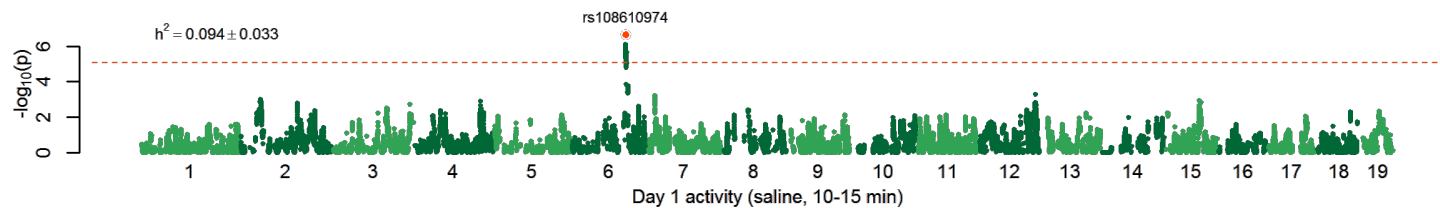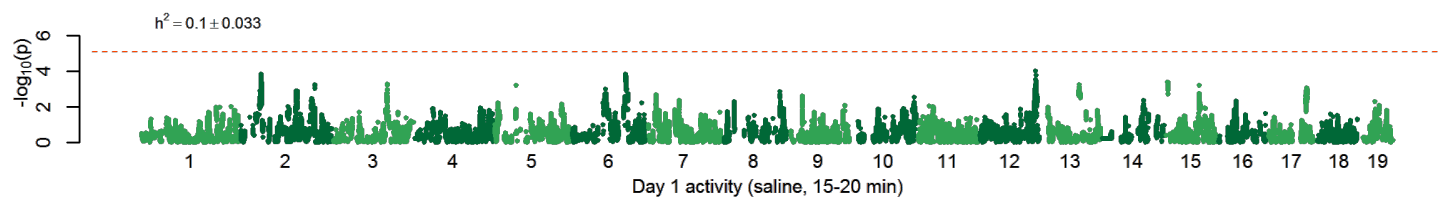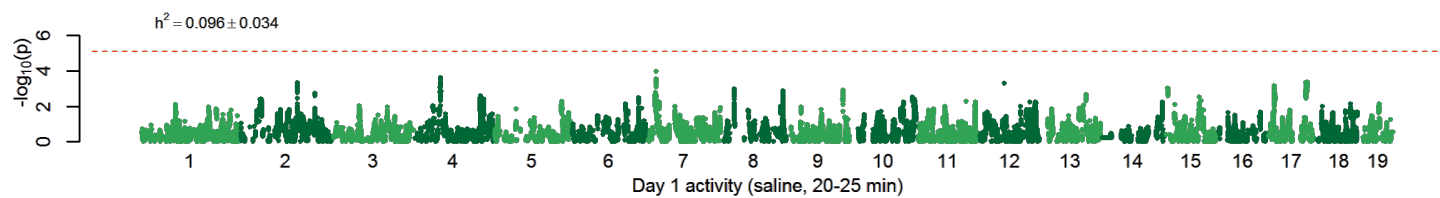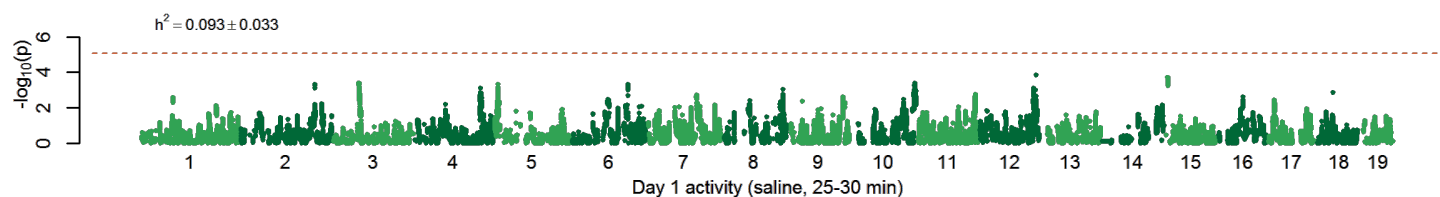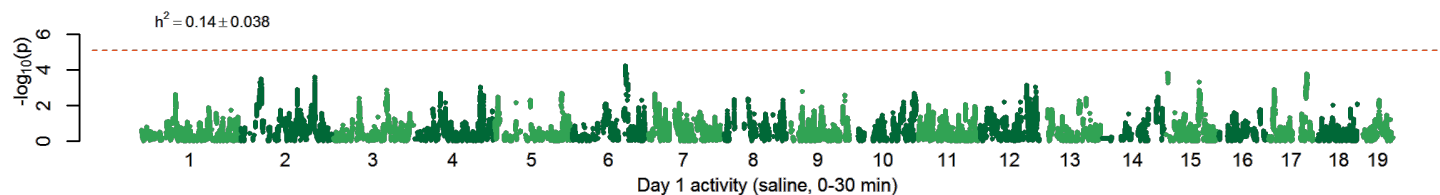

q

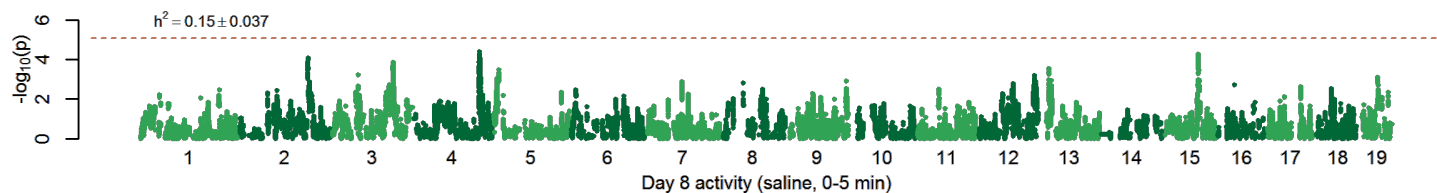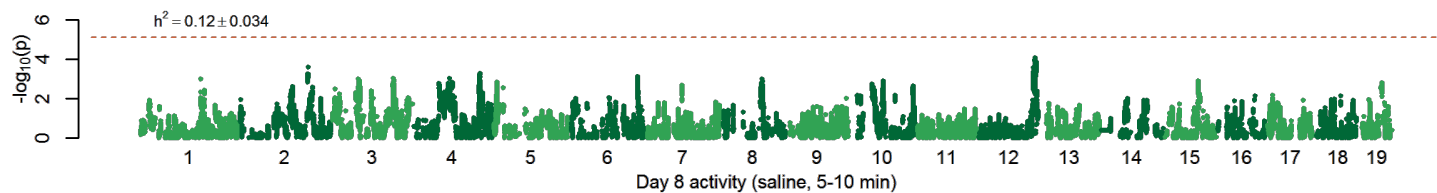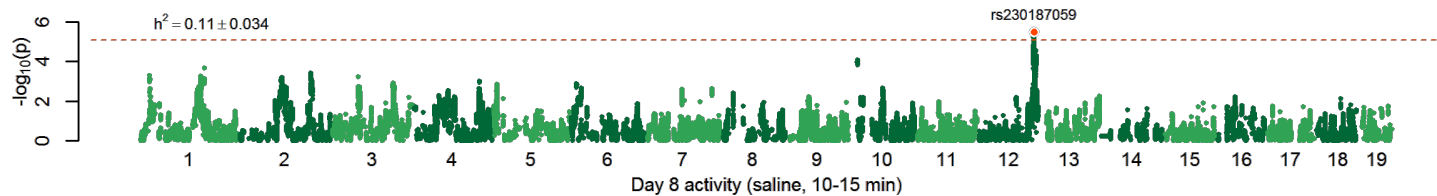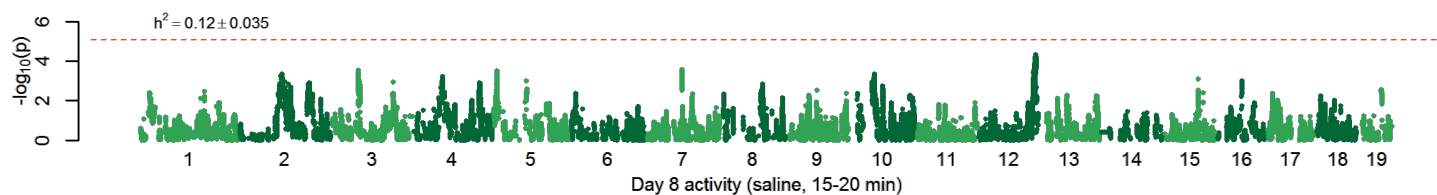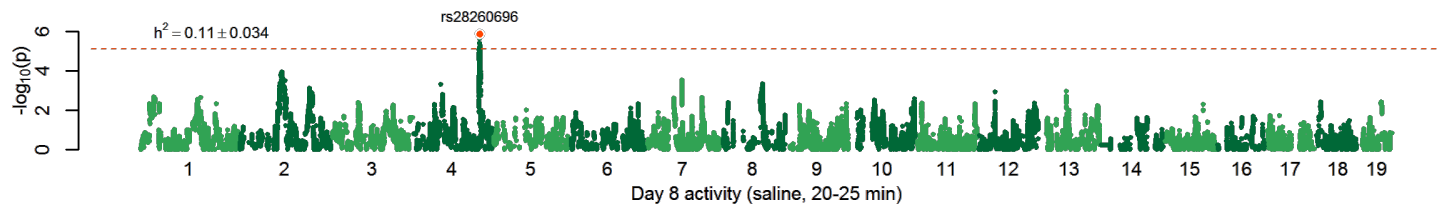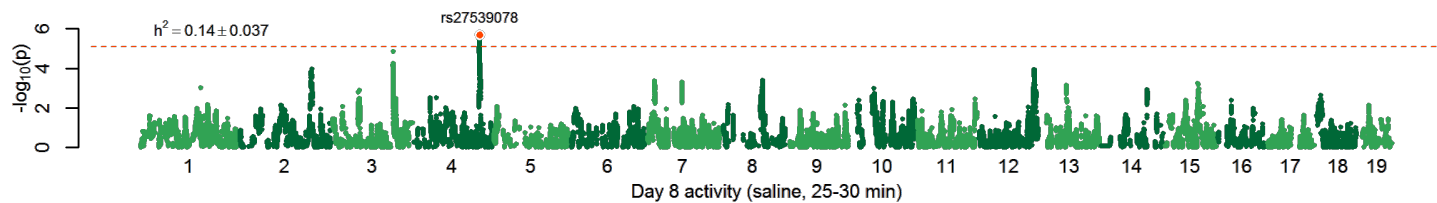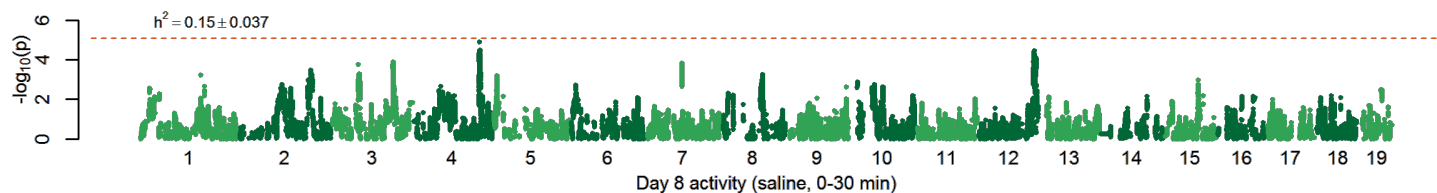



r

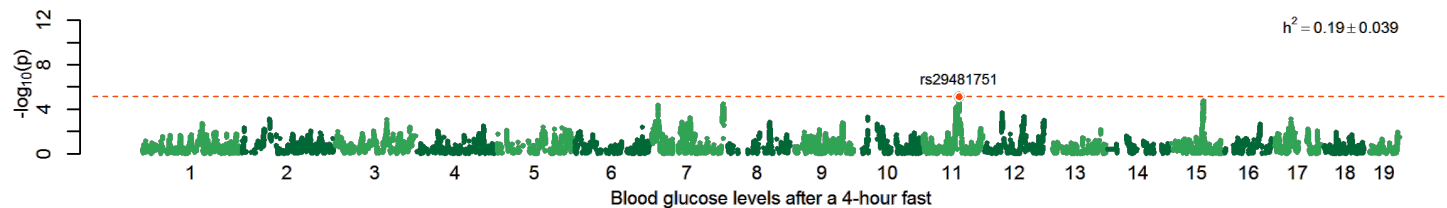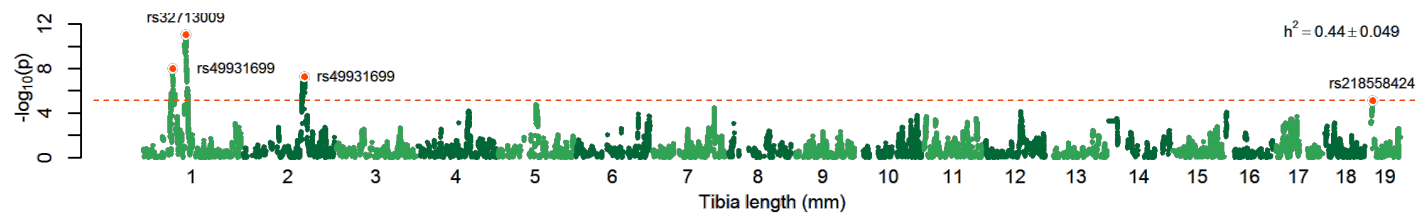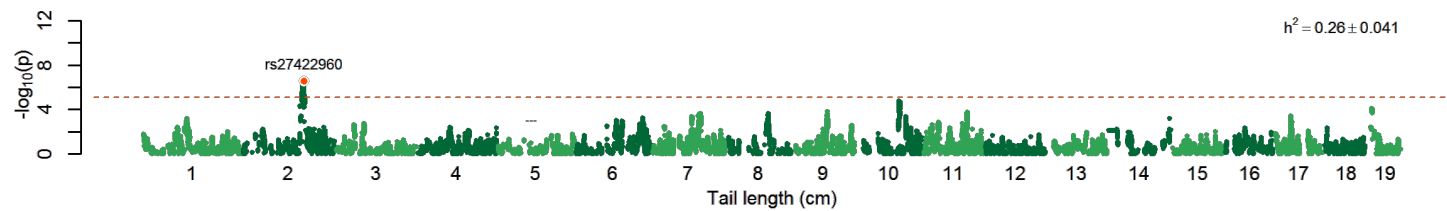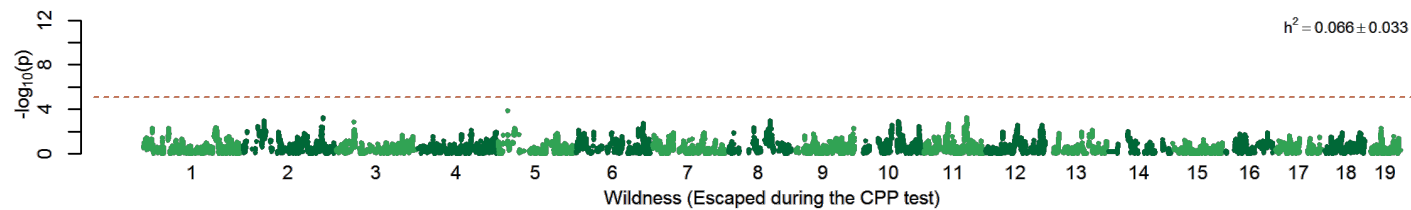

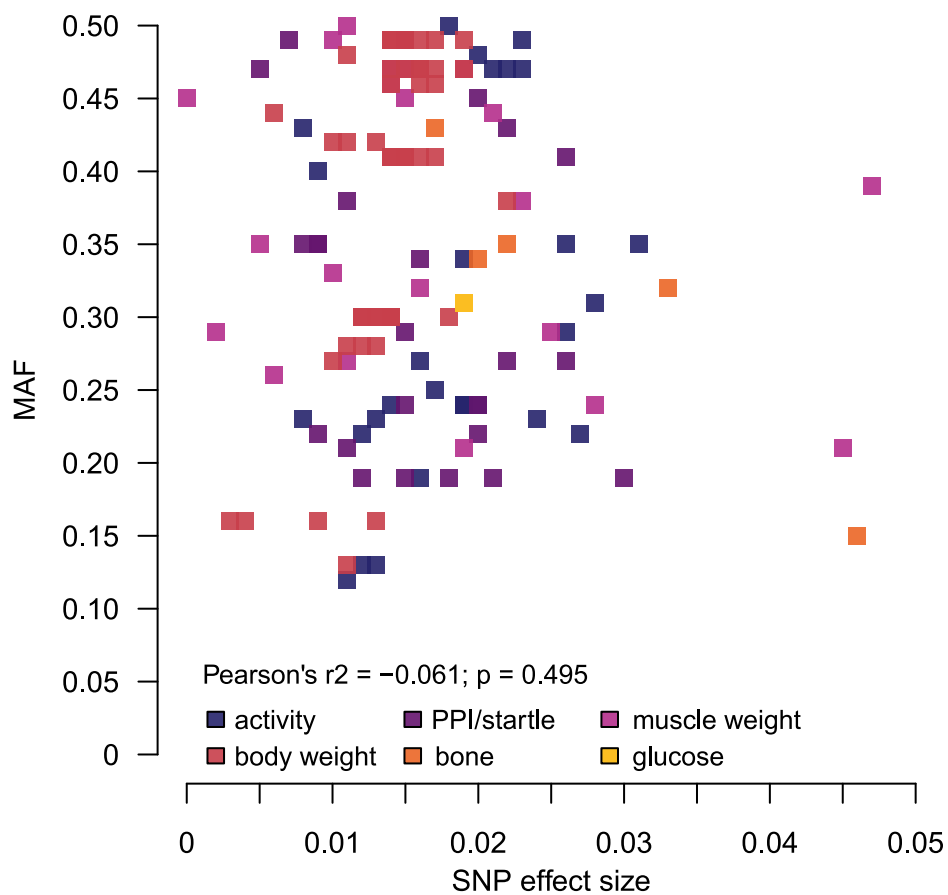

Figure 3: **No relationship between locus effect size and MAF in G50-56 of the LG  $\times$  SM AIL.** The proportion of phenotypic variance explained by the most significant SNP at each locus (locus effect size) is plotted against its MAF. Loci associated with different types of traits are coded according to color.

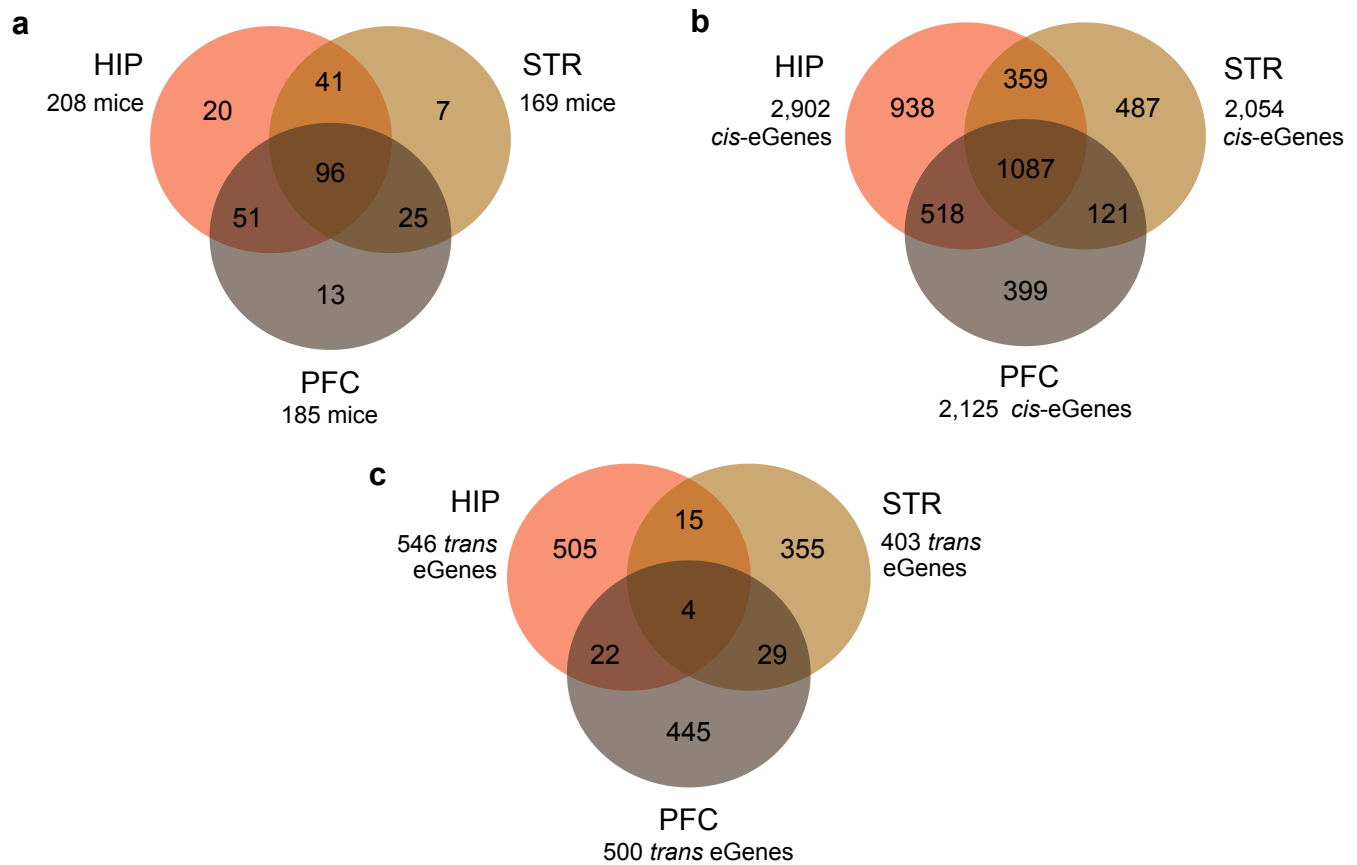

Figure 4: **Summary of eQTLs by brain region.** (a) Number of overlapping samples analyzed from each tissue after quality control. (b) Number of *cis*-eGenes identified in each tissue at  $FDR < 0.05$ ; these values are identical to the number of *cis*-eQTLs in each tissue. (c) Number of *trans*-eGenes identified in HIP ( $p = 9.01 \times 10^{-6}$ ), PFC ( $p = 1.04 \times 10^{-5}$ ), and STR ( $p = 8.68 \times 10^{-6}$ ) at  $\alpha = 0.05$ . The number of *trans*-eQTLs identified in each tissue is slightly greater (HIP=562; PFC=408; STR=506) because some genes had more than one *trans*-eQTL (see Supplementary Table 4 for details).

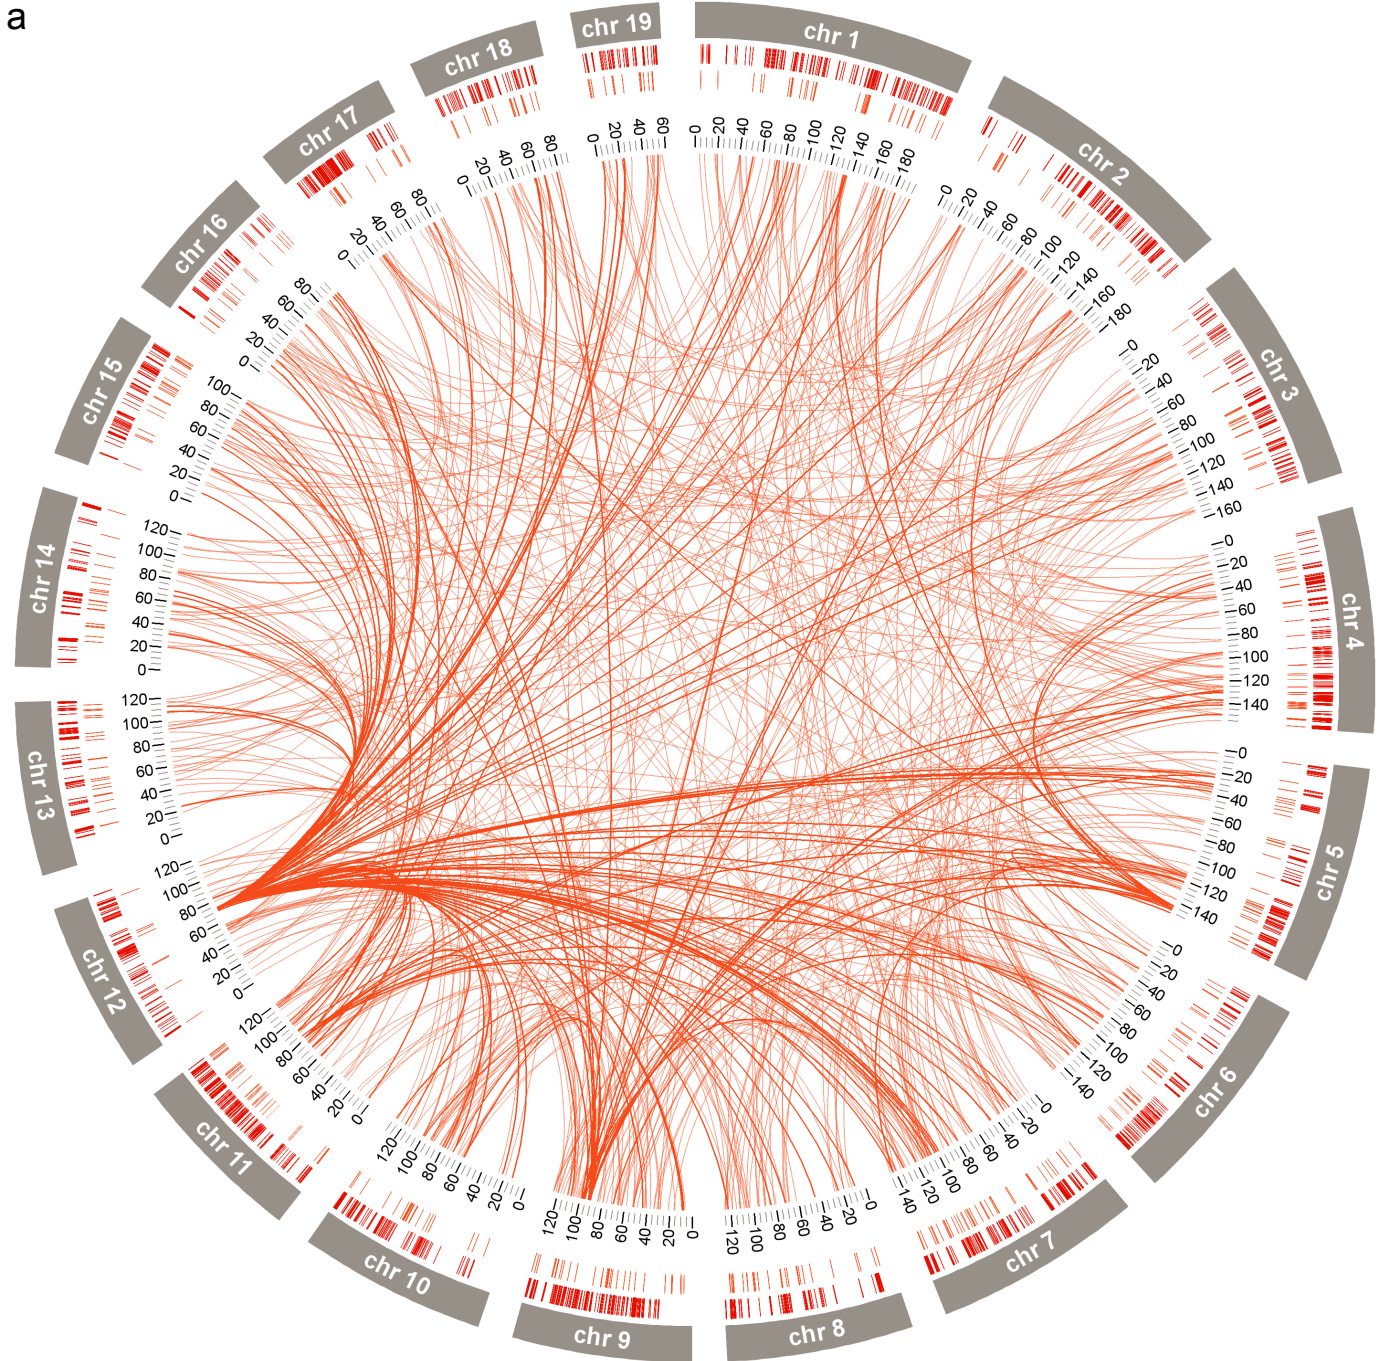

Figure 5: ***cis*-eQTLs and *trans*-eQTLs in HIP, PFC and STR.** (a) Circos plot of eQTLs in HIP. In a-c, each ring inside the circle shows locations of *cis*-eQTLs. *trans*-eQTLs are shown inside the circle. Increasing line opacity indicates *trans*-eQTLs that were associated with a greater number of *trans*-eGenes.



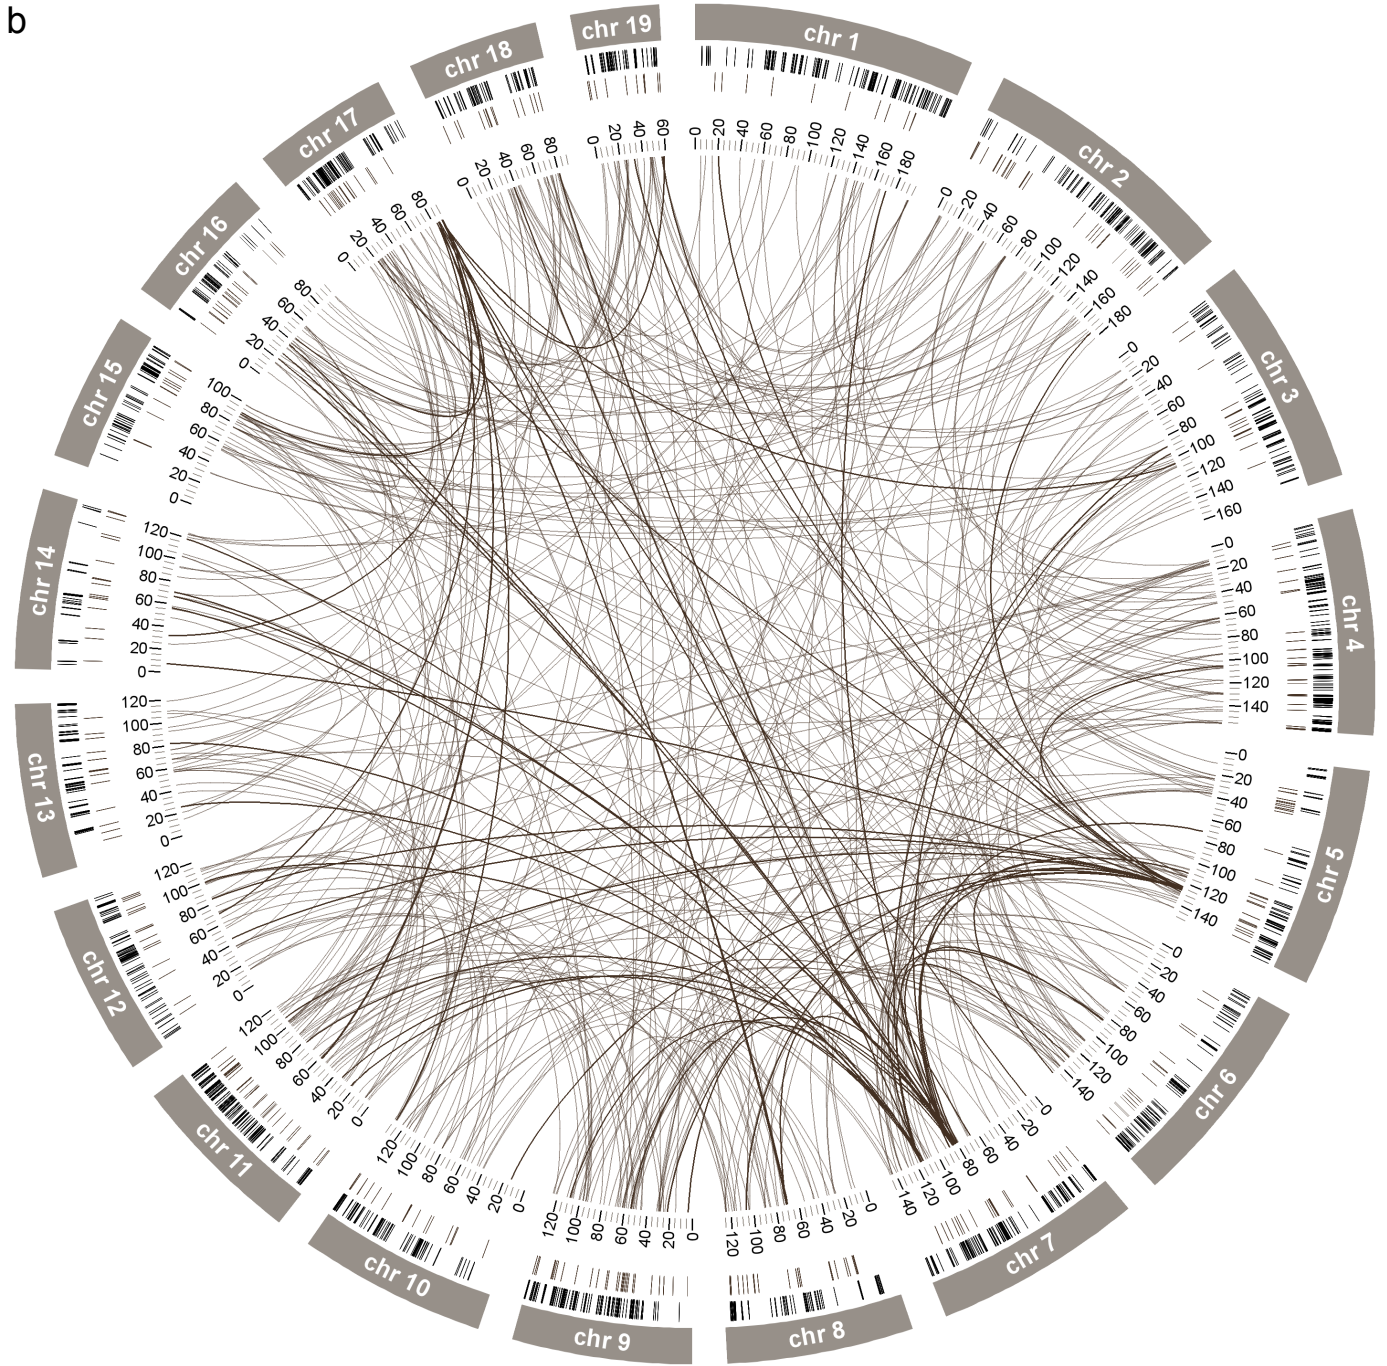

Figure 5: ***cis*-eQTLs and *trans*-eQTLs in HIP, PFC and STR.** (b) Circos plot of eQTLs in PFC. In a-c, each ring inside the circle shows locations of *cis*-eQTLs. *trans*-eQTLs are shown inside the circle. Increasing line opacity indicates *trans*-eQTLs that were associated with a greater number of *trans*-eGenes.

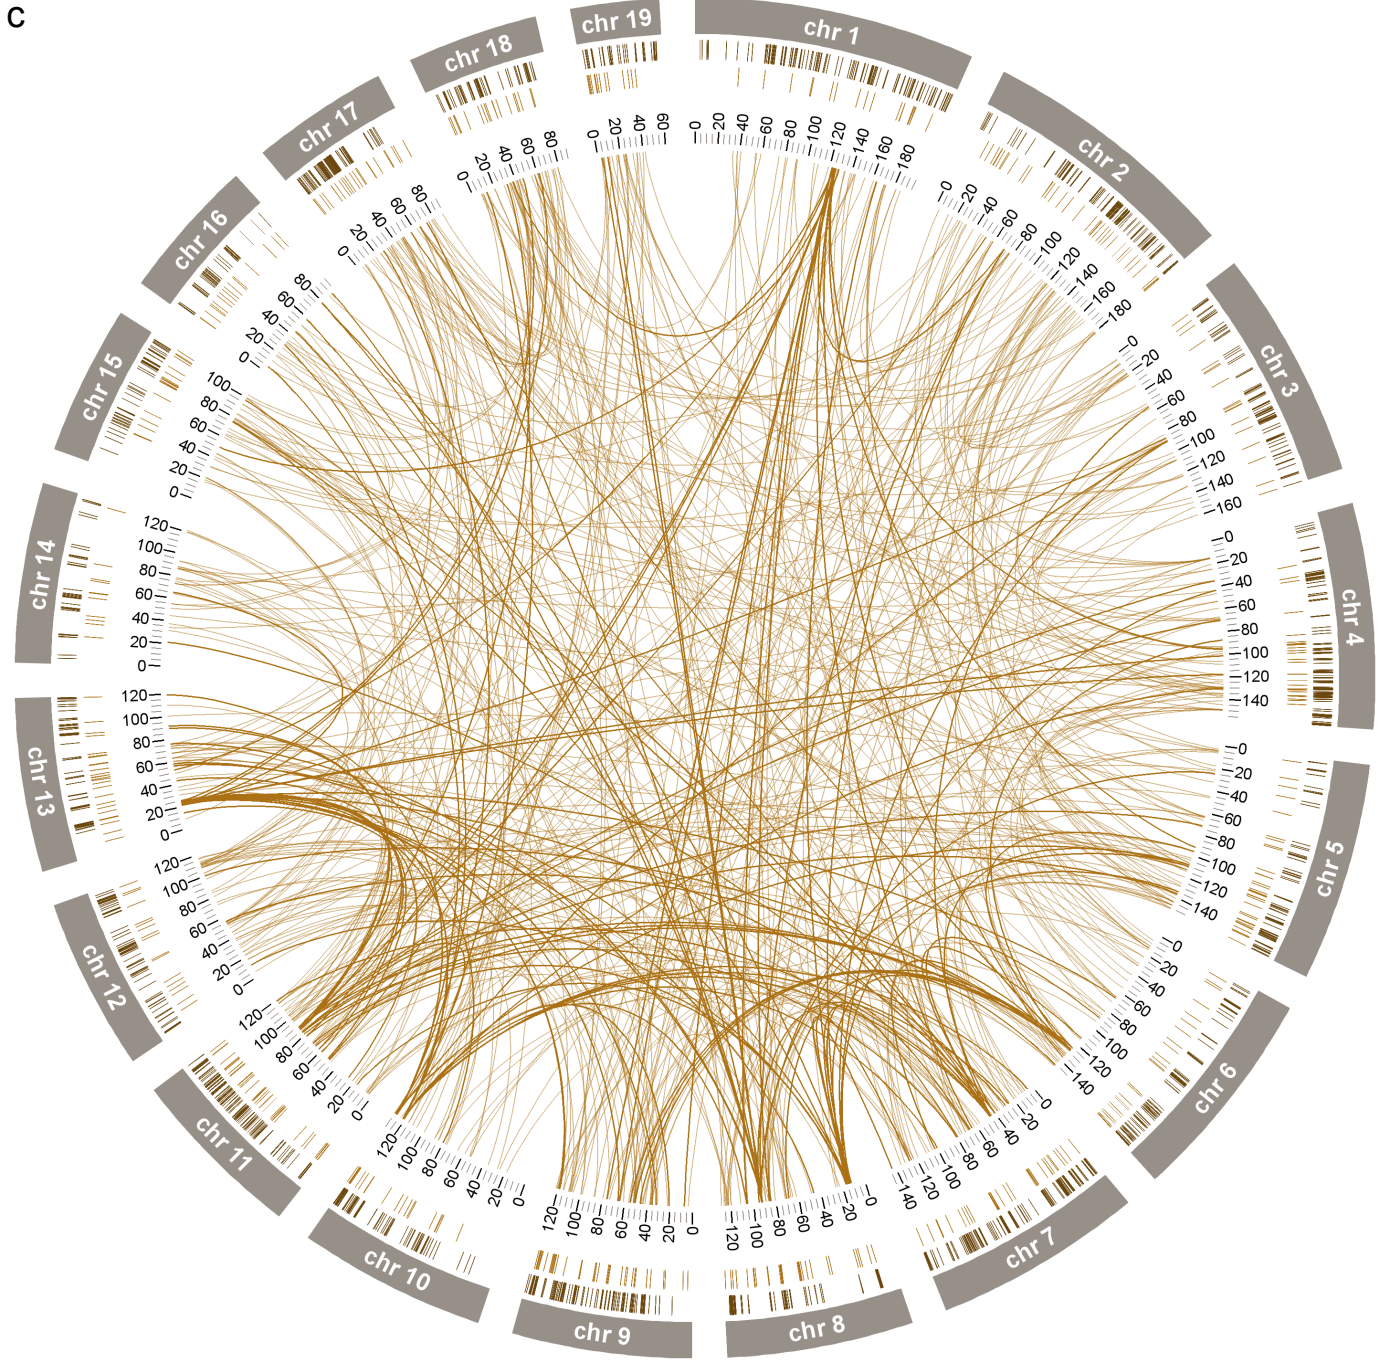

Figure 5: ***cis*-eQTLs and *trans*-eQTLs in HIP, PFC and STR.** (c) Circos plot of eQTLs in STR. In a-c, each ring inside the circle shows locations of *cis*-eQTLs. *trans*-eQTLs are shown inside the circle. Increasing line opacity indicates *trans*-eQTLs that were associated with a greater number of *trans*-eGenes.



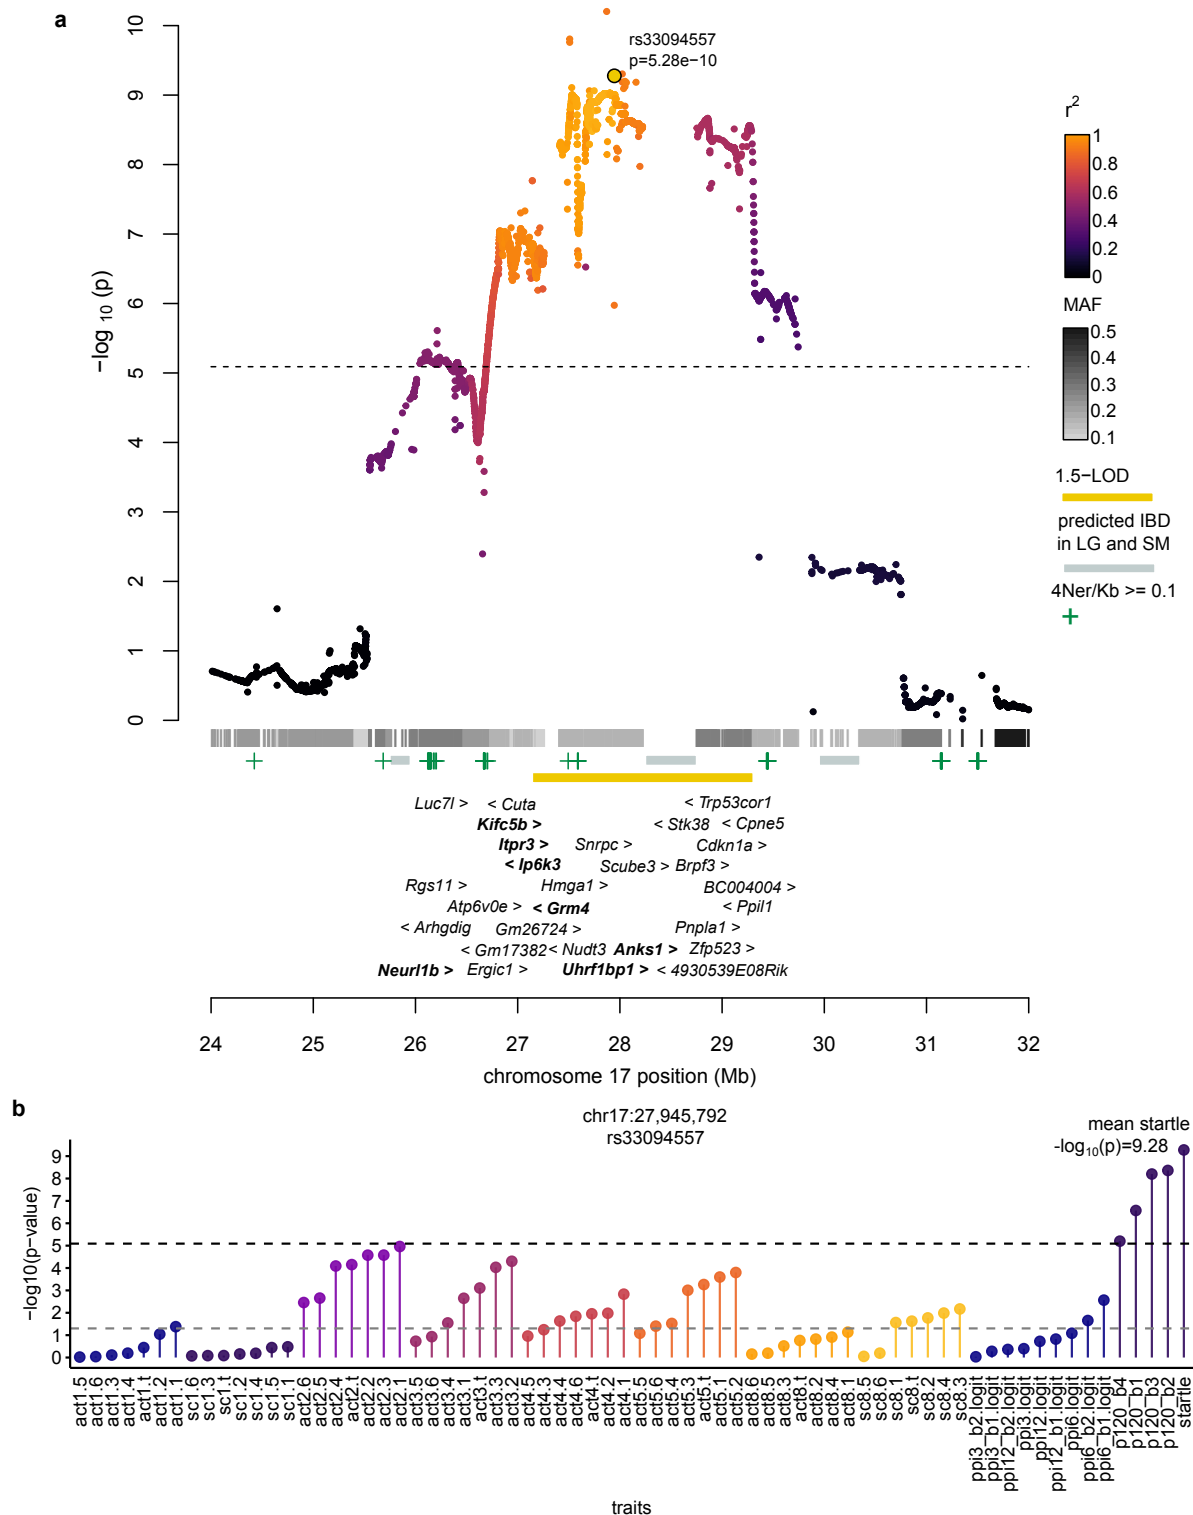

**Figure 6: A locus strongly associated with startle on chromosome 17 has pleiotropic effects on behavior. (a)** Regional association plot of the association between rs33094557 (gold dot) and the mean startle response. The location of *cis*-eGenes, 1.5-LOD interval (gold bar), areas of elevated recombination from Brunshwig *et al.* (ref. 22) (plus symbols), regions predicted by Nikolskiy *et al.* (ref. 13) to be nearly IBD between LG and SM (grey bars), and SNP MAFs (grey heatmap) are indicated. Points are colored by LD ( $r^2$ ) with rs33094557. The dashed line indicates a significance threshold of  $-\log_{10}(p) = 5.09$  ( $\alpha = 0.05$ ). eGenes containing missense mutations (dbSNP v.142) are highlighted with bold text. There are two SNPs which appear more significant than rs33094557; however, they did not exhibit strong LD with nearby SNPs. We considered that these SNPs might be imputation errors. Therefore, we conservatively listed rs33094557, the most significant SNP that was consistent with adjacent markers, as the top association. We used rs33094557 to calculate the 1.5-LOD interval. **(b)** PheWAS plot showing an association on chromosome 17 between rs33094557 and other traits measured in this study. Dashed lines mark the genome-wide significance threshold as in (a) and a nominal significance level of  $p = 0.05$ . Traits are listed by ID, grouped by type and sorted in ascending order of association with rs33094557 (full trait descriptions are provided in Supplementary Table 2).

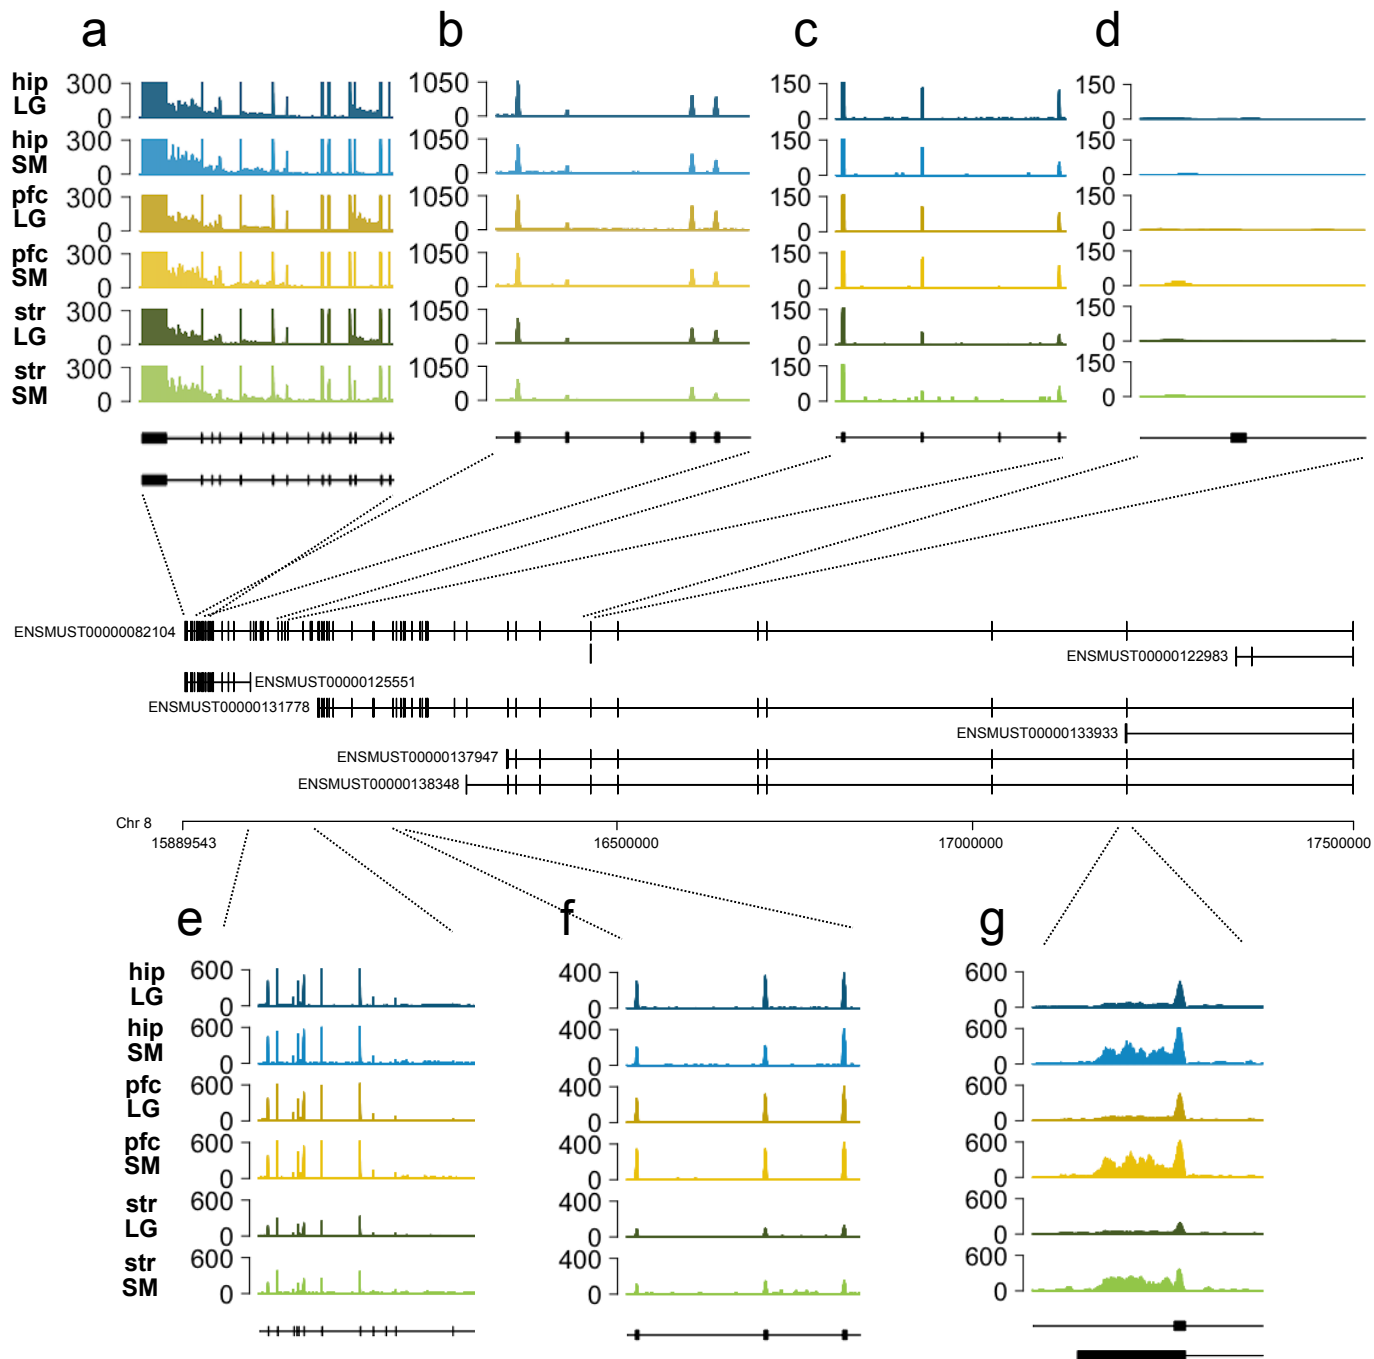

Figure 7: **Average *Csm1* read coverage for SM and LG homozygotes in HIP, PFC and STR.** *Csm1* coverage in each tissue is averaged by genotype class. Only mice that were consistently homozygous-LG or consistently homozygous-SM throughout the *Csm1* locus were included in the average (we excluded mice that had more than two inconsistent genotypes among the 559 SNPs in the region). HIP had 13 SM and 93 LG homozygotes, PFC had 11 SM and 101 LG homozygotes, and STR had 10 SM and 79 LG homozygotes. Reads are plotted as RPKM (length normalization was performed with respect to a bin size of 0.001 kb). Ensembl (release 90) annotates seven transcript structures for *Csm1*, among which only ENSMUST0000082104 is known to code for a protein. Read coverage indicates the (differential) expression of alternative, presumably non-coding transcripts: Transcript ENSMUST0000125551 is believed to retain intronic sequence, supporting intronic reads differing consistently between LG and SM in all three tissues (a). Conversely, SM samples seem to express alternative transcript ENSMUST0000133933 at higher levels than LG across tissues (g). Overall, LG and SM samples exhibit a similar expression pattern of exons unique to the protein coding transcript (e). Several exons, however, show a slightly higher read coverage in LG than in SM, e.g. first and last exon in (b), and first and second exon (from left) in (f), HIP. Furthermore, samples seem to express novel transcripts missing in the annotation (missing read coverage in b-d).



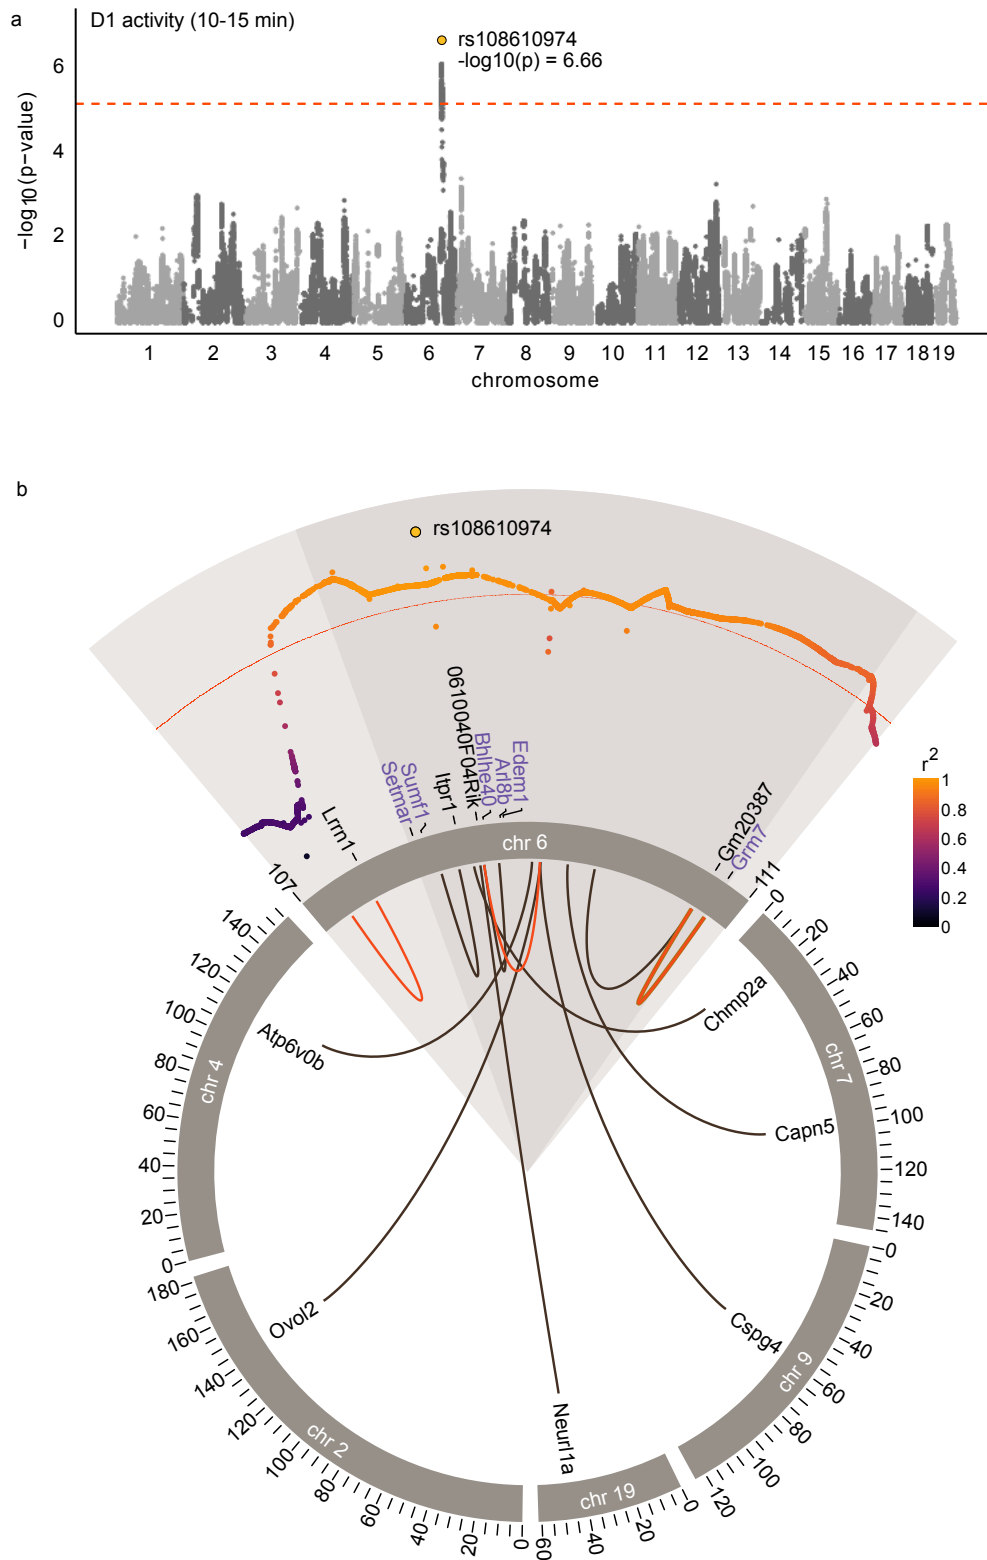

Figure 8: **Several *trans*-eQTLs located in *ltp1* overlap a locus associated with D1 side changes on chromosome 6.** Manhattan plot of loci identified for D1 side changes (10-15 min). The most significant SNP on chromosome 6 (rs108610974;  $p = 2.18 \times 10^{-7}$ ) is highlighted in gold in both plots. The dashed lines in each plot indicate a permutation-derived threshold of  $p = 8.06 \times 10^{-6}$ , or  $-\log_{10}(p) = 5.09$  ( $\alpha = 0.05$ ). **(b)** Circos plot highlighting eQTLs that overlap the region associated with D1 side changes. A zoomed-in plot of the locus is shown on chromosome 6 with  $-\log_{10}$  p-values on the y-axis and physical position (Mb) on the x-axis. The dark shaded region highlights the 1.5-LOD interval, and SNPs are colored according to LD ( $r^2$ ) with rs108610974. eGenes are shown in black and other genes at the locus that did not have eQTLs are shown in purple. The inner circle shows eQTLs and their target genes; HIP eQTLs are shown in orange, PFC eQTLs are shown in black, and one STR eQTL is shown in brown. Only chromosomes targeted by *trans*-eQTLs at the chromosome 6 region are plotted.



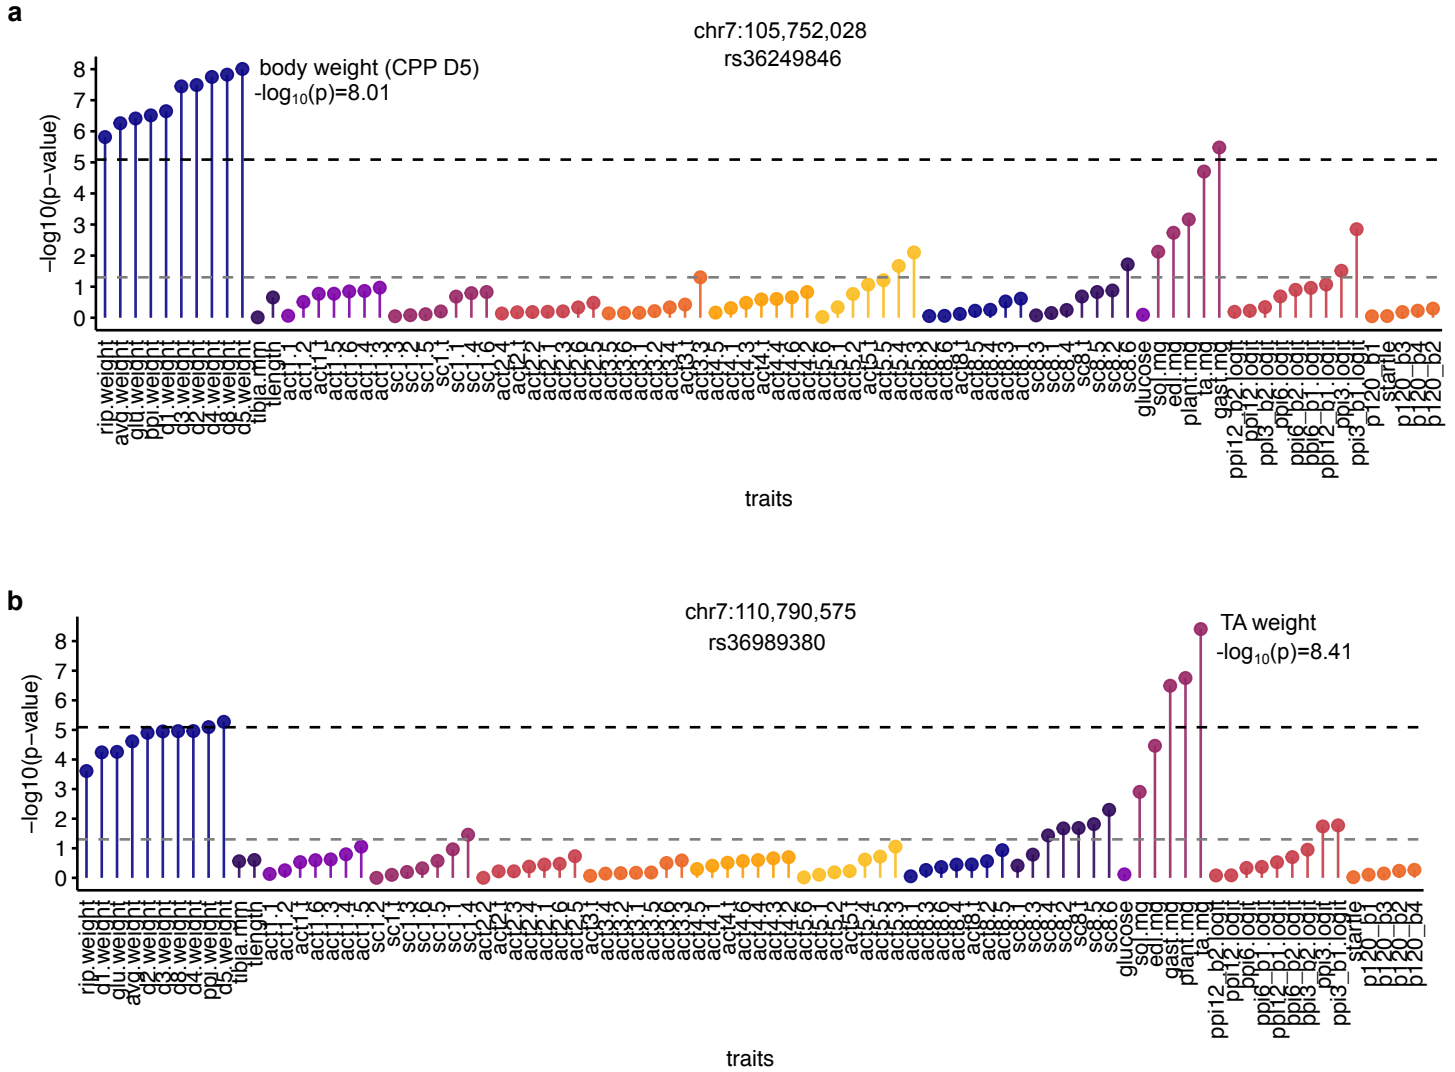

Figure 10: **A locus on chromosome 7 has pleiotropic effects on body weight and TA mass.** (a) PheWAS plot of an association on chromosome 7 between rs36249846 (the top SNP for body weight on D5 of the CPP test at this locus) and other traits measured in this study. (b) PheWAS plot of an association between rs36989380 (the top SNP for TA mass at this locus) and other traits measured in this study. rs36249846 and rs36989380 are located 5.04 Mb apart; LD ( $r^2$ ) between the two SNPs is 0.557. Dashed lines mark the genome-wide significance threshold  $-\log_{10}(p) = 5.09$  ( $\alpha = 0.05$ ) and a nominal significance level of  $p=0.05$ . Traits are listed by ID, grouped by type and sorted in ascending order of association with the top SNP (full trait descriptions are provided in Supplementary Table 2).



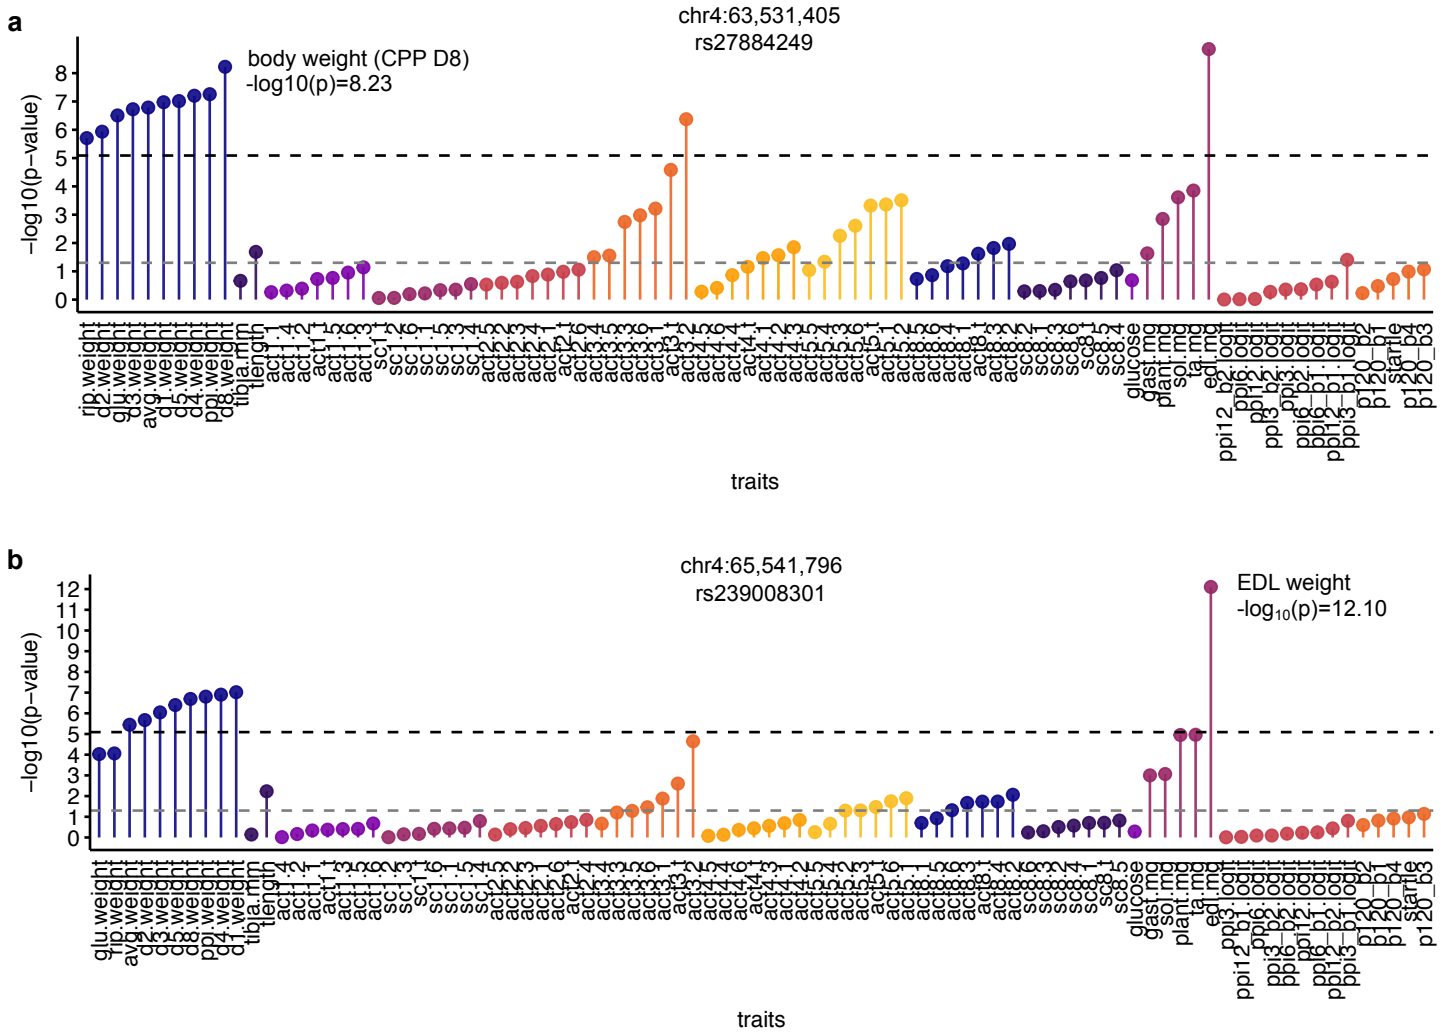

Figure 12: **Pleiotropic effects on physiology and behavior at a locus on chromosome 4.** (a) PheWAS plot of an association on chromosome 4 between rs27884249 (the top SNP for body weight on D8 of the CPP test at this locus) and other traits measured in this study. (b) PheWAS plot of an association between rs239008301 (the top SNP for EDL mass at this locus) and other traits measured in this study. rs27884249 and rs239008301 are located 2.01 Mb apart; LD ( $r^2$ ) between the two SNPs is 0.663. Dashed lines mark the genome-wide significance threshold of  $-\log_{10}(p) = 5.09$  ( $\alpha = 0.05$ ) and a nominal significance level of  $p=0.05$ . Traits are listed by ID, grouped by type and sorted in ascending order of association with the top SNP (full trait descriptions are provided in Supplementary Table 2).

Figure 13: **Trait correlation maps.** Heat maps of Pearson's  $r^2$  correlations for the quantile-normalized residuals of traits measured in G50-56 AIL mice (covariate effects have been removed). We calculated  $r^2$  using all pairwise complete observations. Primary physiological and behavioral traits are summarized in **a-b**; correlations for binned traits are plotted in **c-f**. Sample sizes and descriptions for each trait are provided in Supplementary Table 2. **(a)** Physiological traits. AVG weight is the average of weight measured on CPP D1, CPP D8, during PPI, glucose testing, and time of death (i.e. measurements taken one week apart). CPP, PPI, GLU weights are weights for days when CPP, PPI, or glucose levels were tested. RIP (rest in peace) weight is weight at the time of death. TA is tibialis anterior weight, EDL is extensor digitorum longus weight. **(b)** Primary behavioral traits. Only CPP, sensitization and activity traits measured from 0-30 minutes are included (see d-f for binned measurements). CPP diff is the difference in CPP on D8 minus CPP on D1, Meth sens is locomotor sensitization to 1 mg/kg methamphetamine (D4 minus D2 activity). Activity (act) trait labels include testing day and bin number separated by a period, and t stands for total activity (0-30 minutes). Saline is locomotor activity following vehicle administration (control) and meth is locomotor activity following methamphetamine administration (1 mg/kg). PPI traits are averaged over two prepulse blocks (3, 6, and 12 refer to the prepulse intensity). AVG startle is the average of startle blocks 1-4. Habituation is the difference between startle block 4 and startle block 1. **(c)** Startle, PPI and habituation. Individual PPI and startle blocks are shown; trait labels are the same as in **(b)**. PPI3, PPI6, and PPI12 refer to prepulse intensity (3, 6, or 12 dB above 70 dB background noise). **(d)** CPP. Labels for binned measurements are as described in **(b)**. CPP diff is the difference between D8 minus D1 preference. CPP1 and CPP8 refer to CPP on D1 (initial preference for the left side of the testing chamber before it was paired with methamphetamine) and D8 (preference for the left side of the testing chamber after conditioning). **(e)** Saline-induced activity. Correlations for saline activity (act) for D1, D3, D5, and D8 and side changes on D1 and D8 are shown. Trait labels include testing day and bin number separated by a period. For example, act1.1 stands for D1 activity during bin 1 (0-5 minutes) and t stands for total activity (0-30 minutes). On D1 and D8, mice are allowed to explore both sides of the CPP testing chamber, and there is more total area to explore. On D3 and D5, mice are restricted to the right side of the chamber. **(f)** Methamphetamine-induced activity. Correlations for activity in response to methamphetamine and locomotor sensitization.

**a**

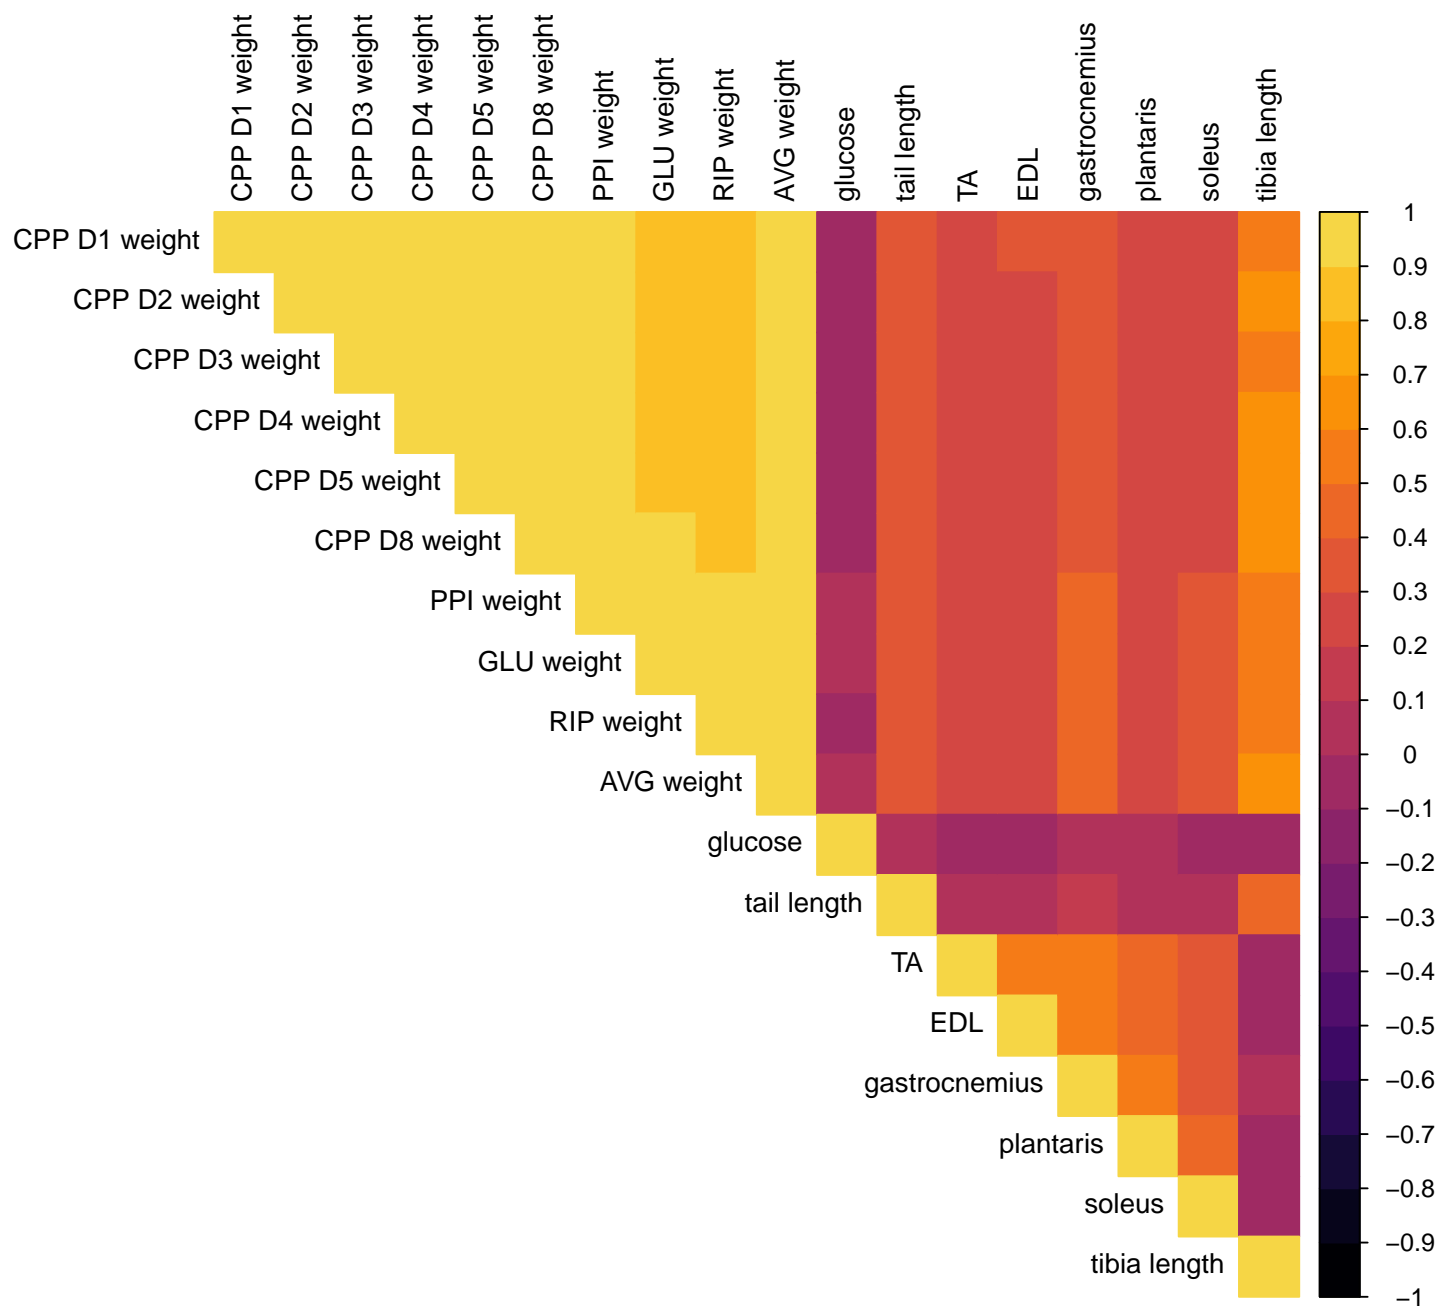

**b**

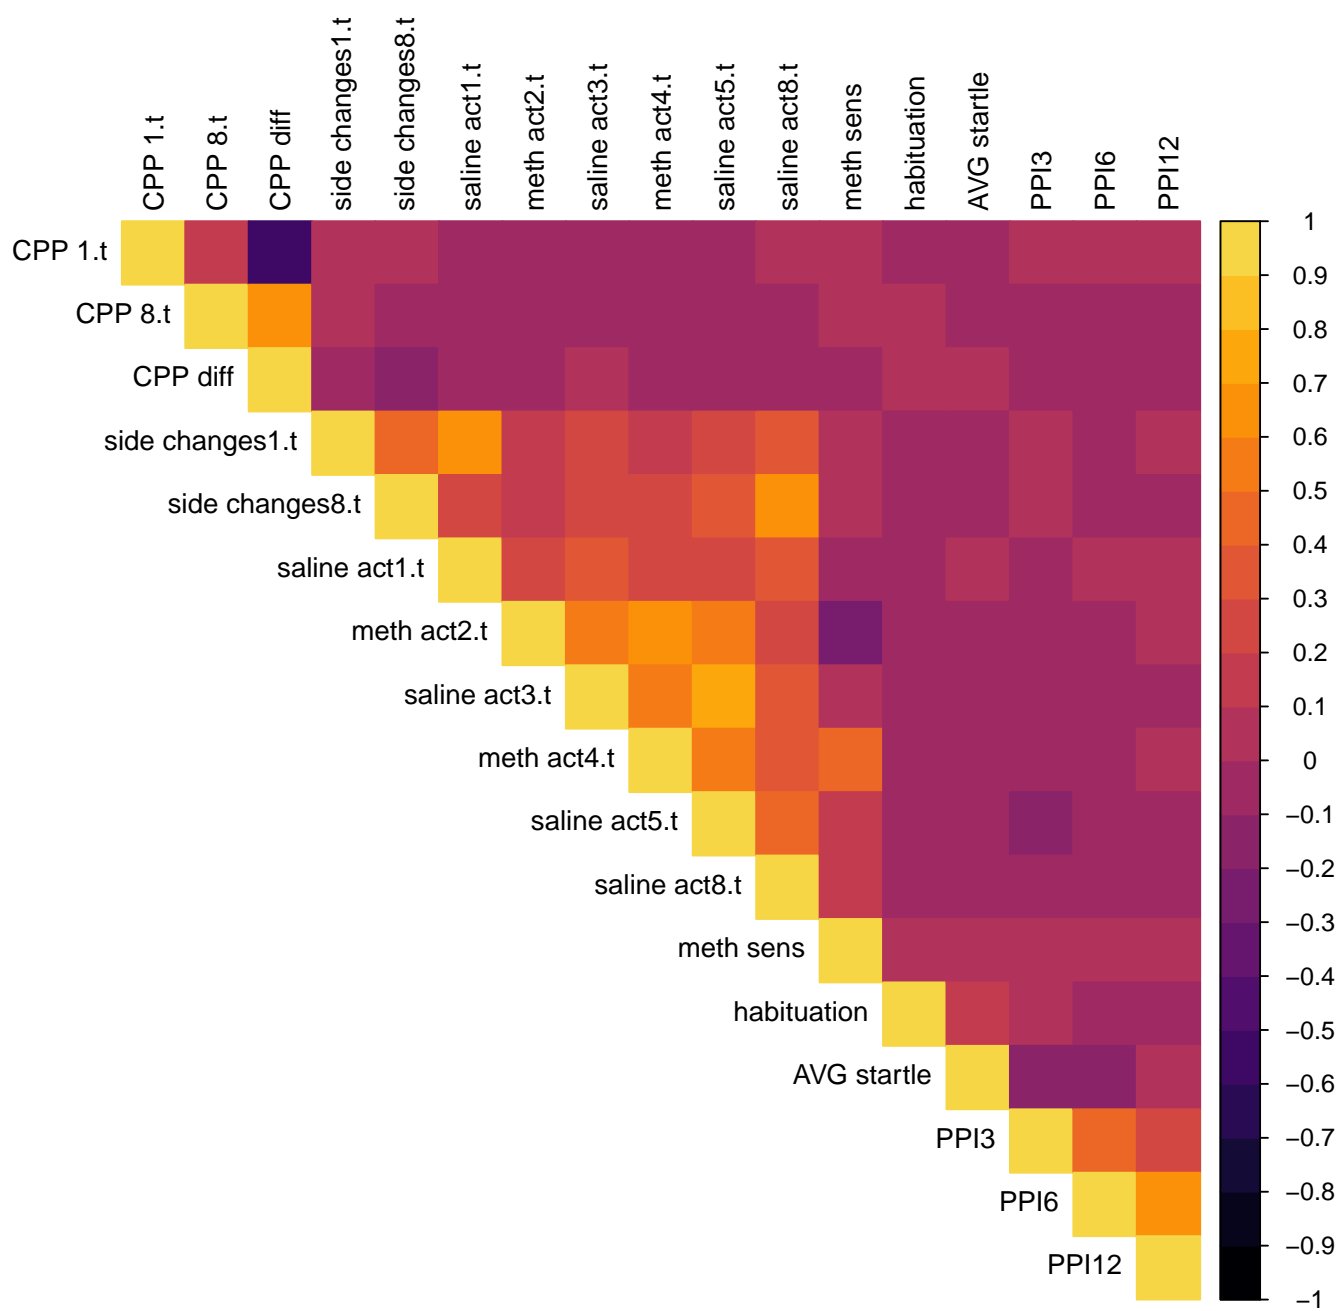



c

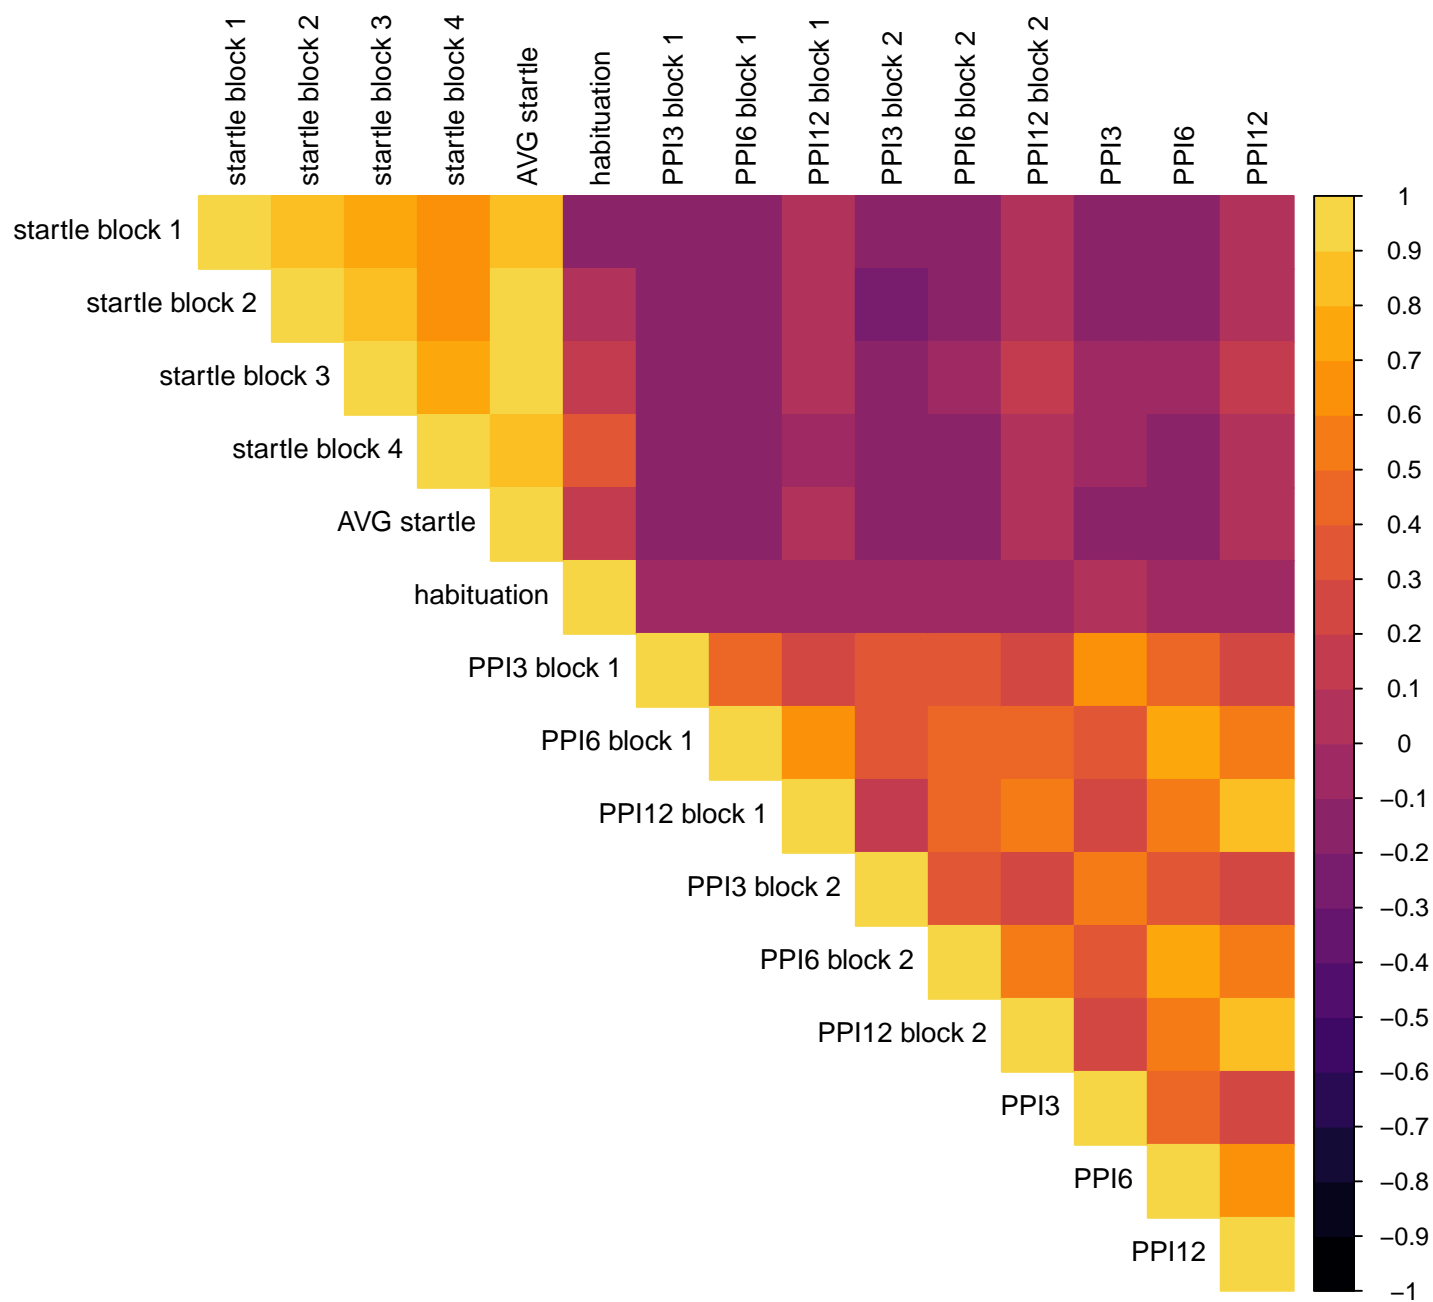

d

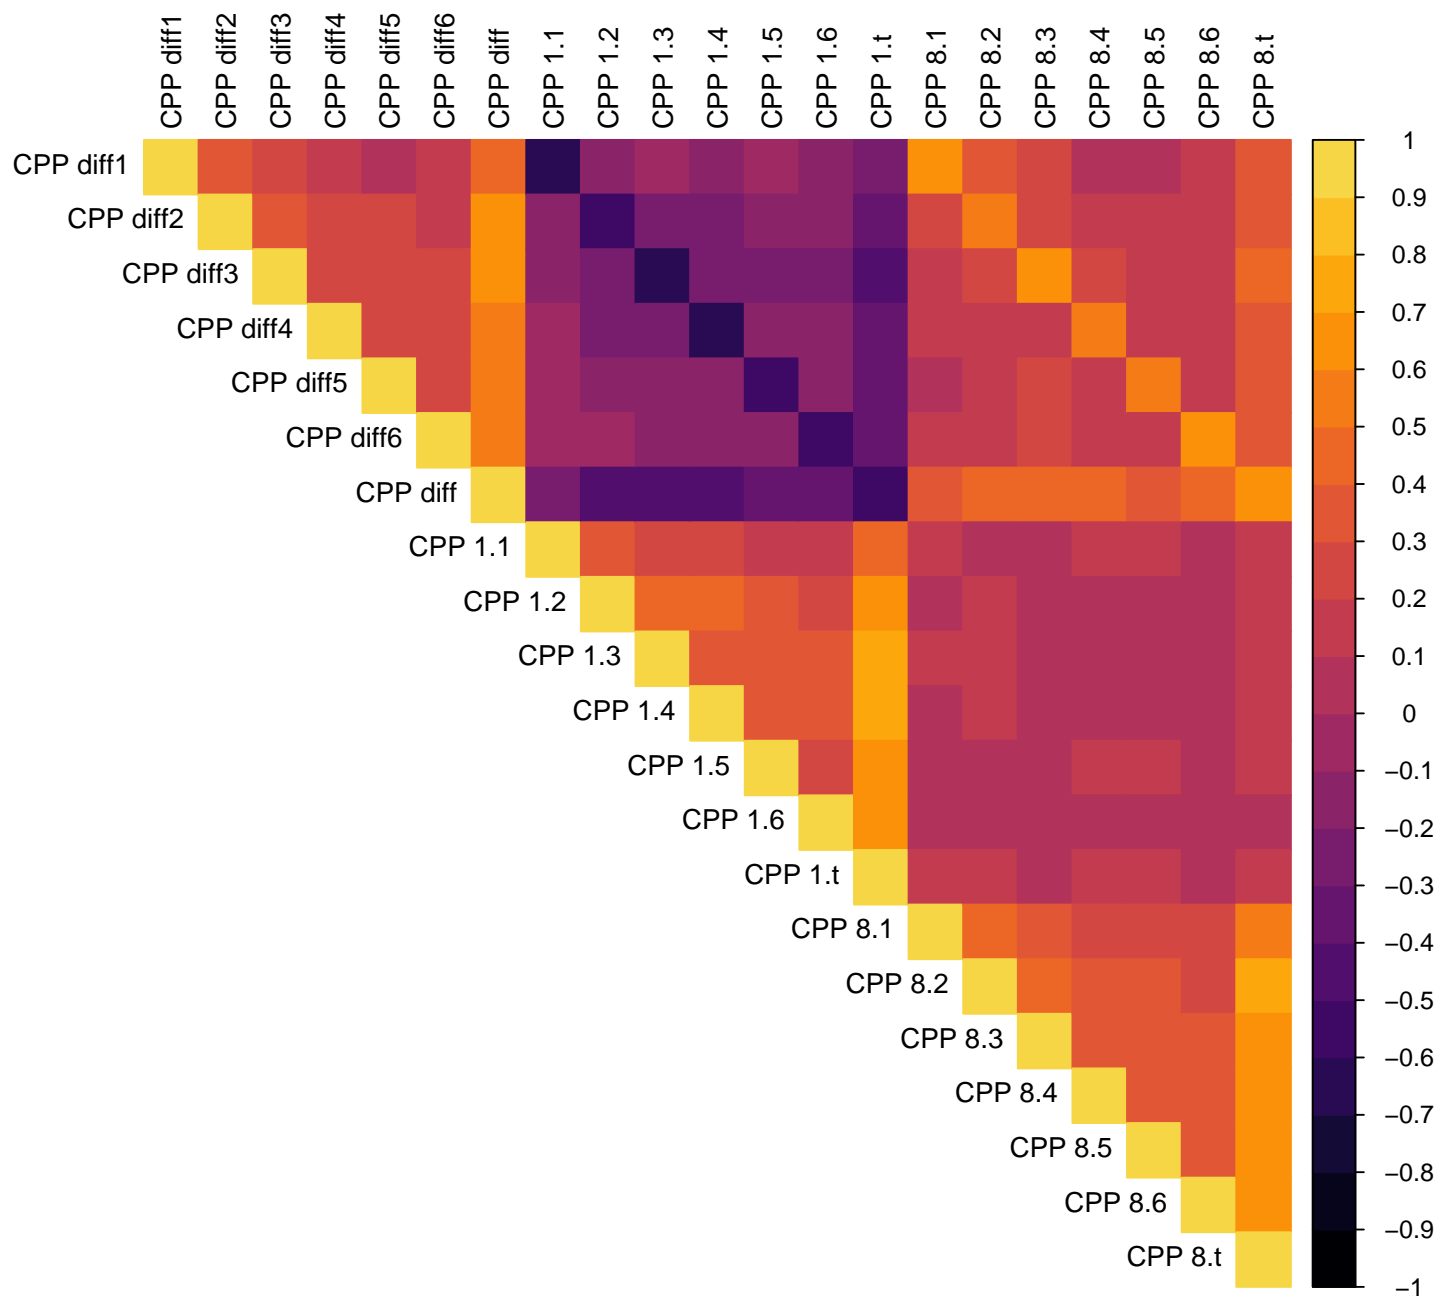

e

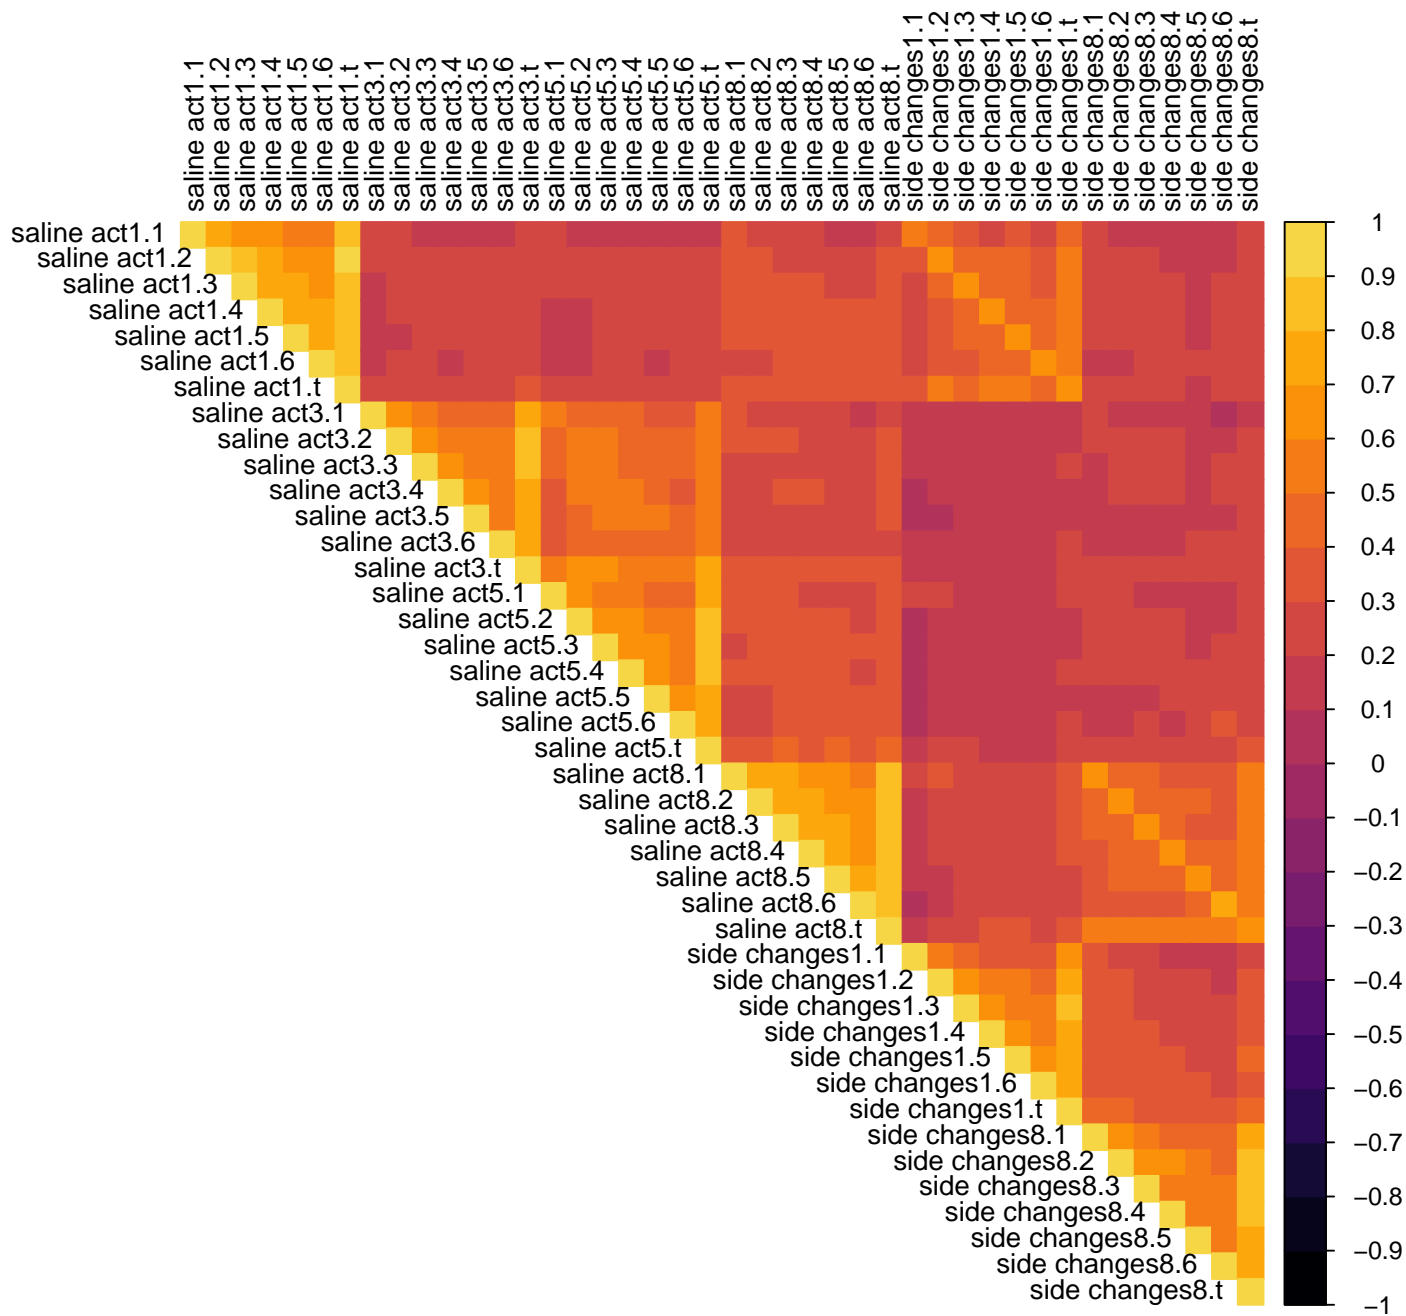

f

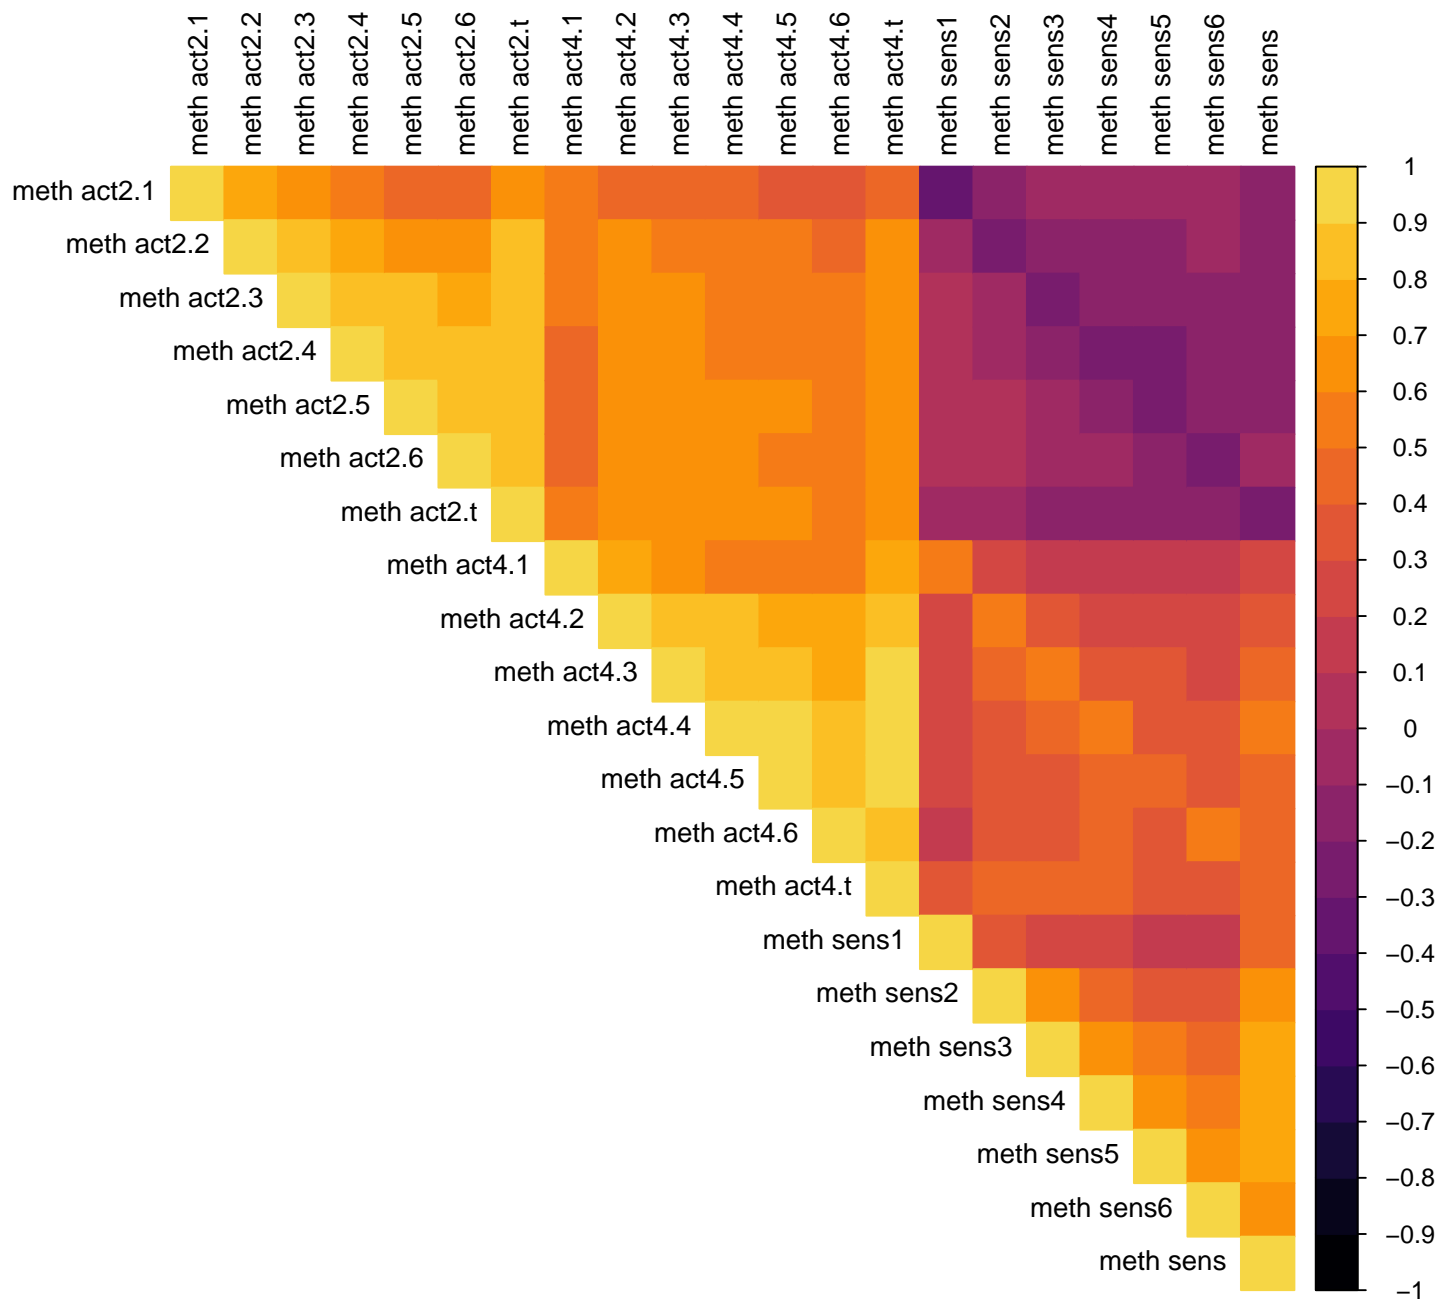

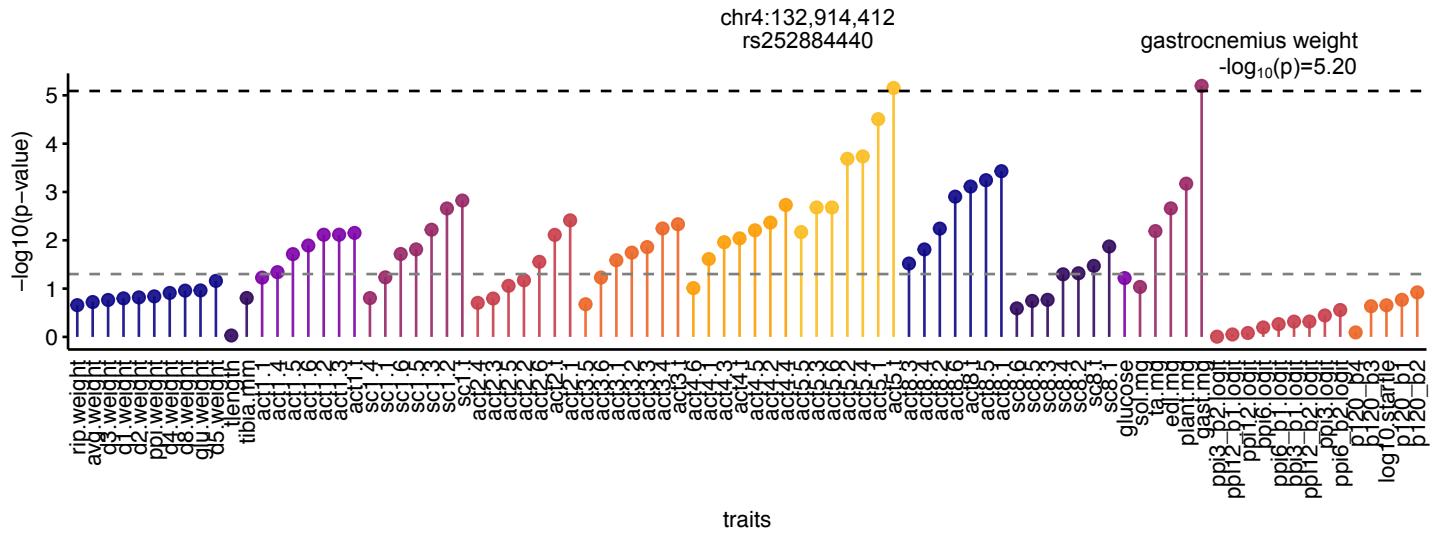

Figure 14: **Pleiotropic effects on gastrocnemius weight and locomotor activity at a locus on chromosome 4.** PheWAS plot of an association on chromosome 4 between rs252884440 (the top SNP for gastrocnemius muscle weight at this locus) and other traits measured in this study. Dashed lines mark the genome-wide significance threshold of  $-\log_{10}(p) = 5.09$  ( $\alpha = 0.05$ ) and a nominal significance level of  $p=0.05$ . Traits are listed by ID, grouped by type and sorted in ascending order of association with the top SNP (full trait descriptions are provided in Supplementary Table 2).

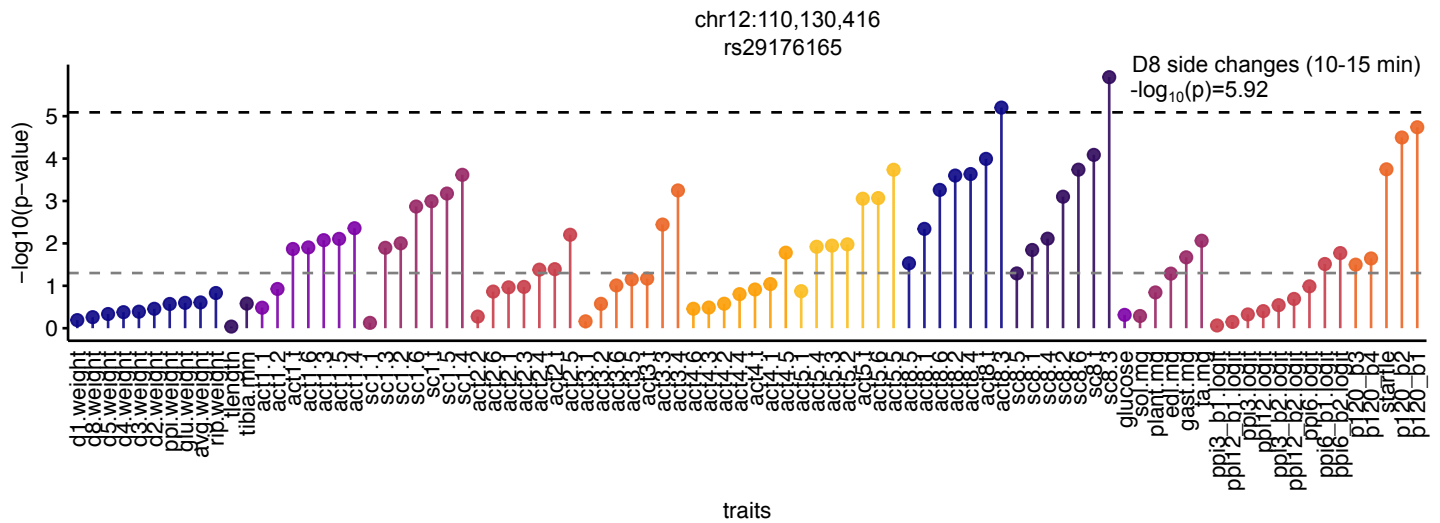

Figure 15: **Pleiotropic effects of a locus associated with locomotor activity on chromosome 12.** PheWAS plot of an association on chromosome 12 between rs29176165 and other traits measured in this study. Dashed lines mark the genome-wide significance threshold of  $-\log_{10}(p) = 5.09$  ( $\alpha = 0.05$ ) and a nominal significance level of  $p=0.05$ . Traits are listed by ID, grouped by type and sorted in ascending order of association with the top SNP (full trait descriptions are provided in Supplementary Table 2).

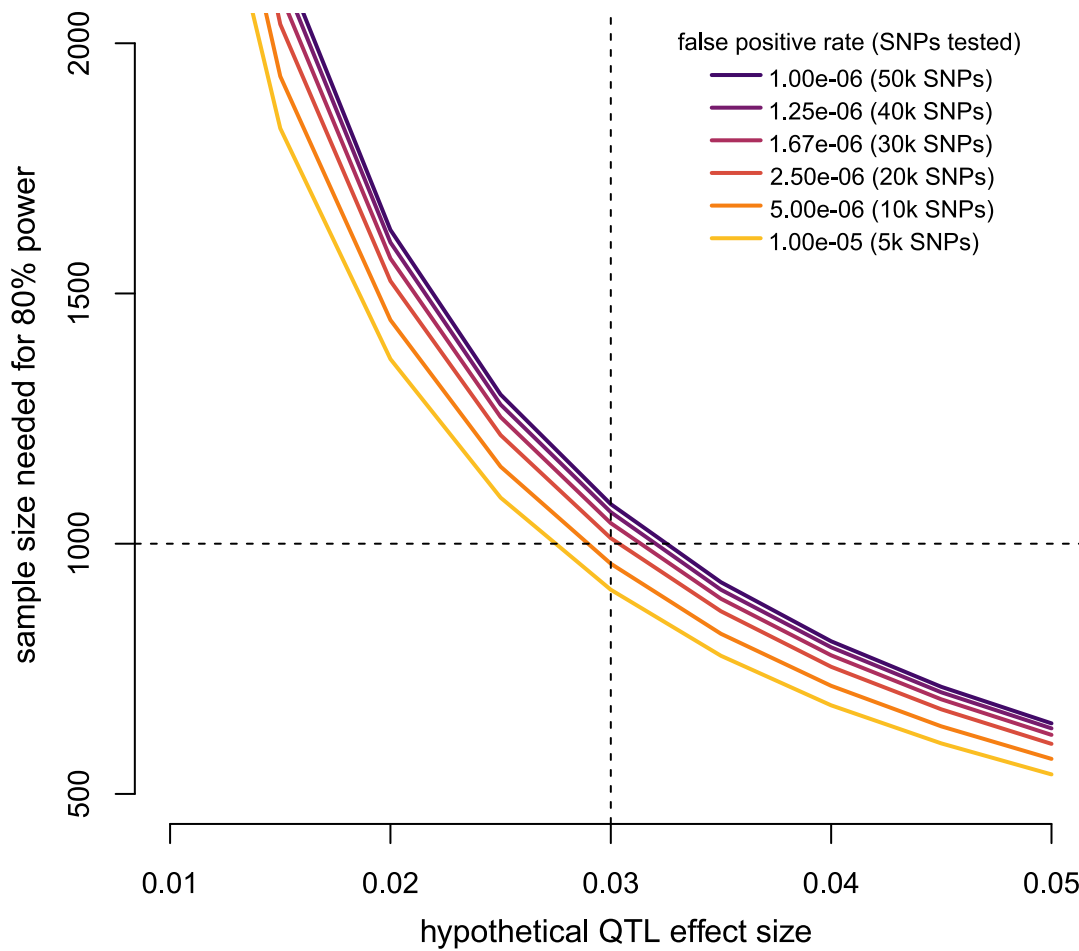

Figure 16: **Sample size needed for 80% power to detect associations with effect sizes ranging from 0.01 to 0.05.** Each line represents the Bonferroni-corrected false positive rate ( $\alpha = 0.05$ ) for a hypothetical data set containing between 5,000 and 50,000 independent SNPs. For example, a sample of 1,000 mice would be needed to detect associations with an effect size of 0.03 given a Bonferroni-corrected false positive rate of  $1.0 \times 10^{-6}$  (or, equivalently, given 50,000 independent association tests). Calculations are based on a simple linear model that does not account for relatedness or non-additive genetic effects.

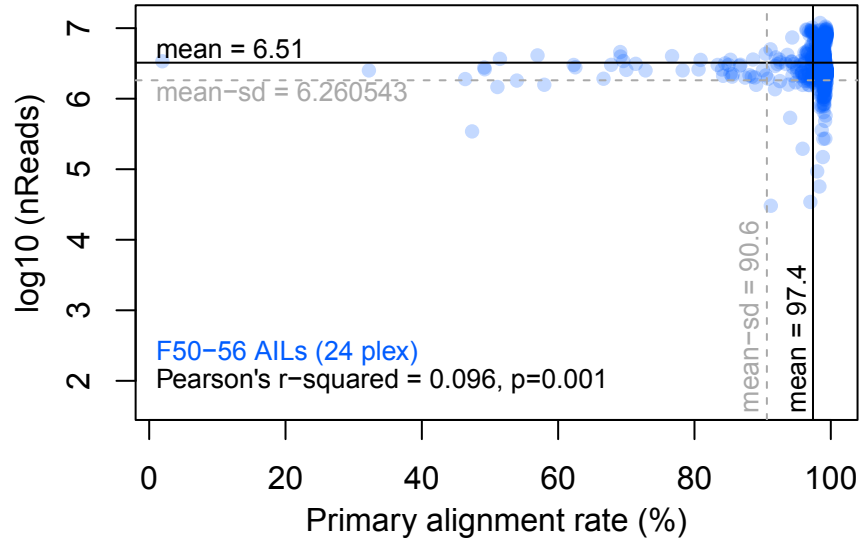

Figure 17: **Primary alignment rate and number of reads in GBS samples.** Mean alignment rate and mean  $\log_{10}$ -transformed number of reads for all 1,100 GBS samples are shown as solid lines; their standard deviations are shown as dashed lines. We sequenced 24 samples per lane on an Illumina HiSeq 2500 (Illumina, San Diego, USA) using 100 bp SE reads. We discarded 32 samples with  $<1\text{M}$  reads aligned to the main chromosome contigs (1-19, X, Y) or with a primary alignment rate  $<77\%$  (3 s.d. Lower than the mean). Data for the remaining 1,078 samples are plotted as blue points.



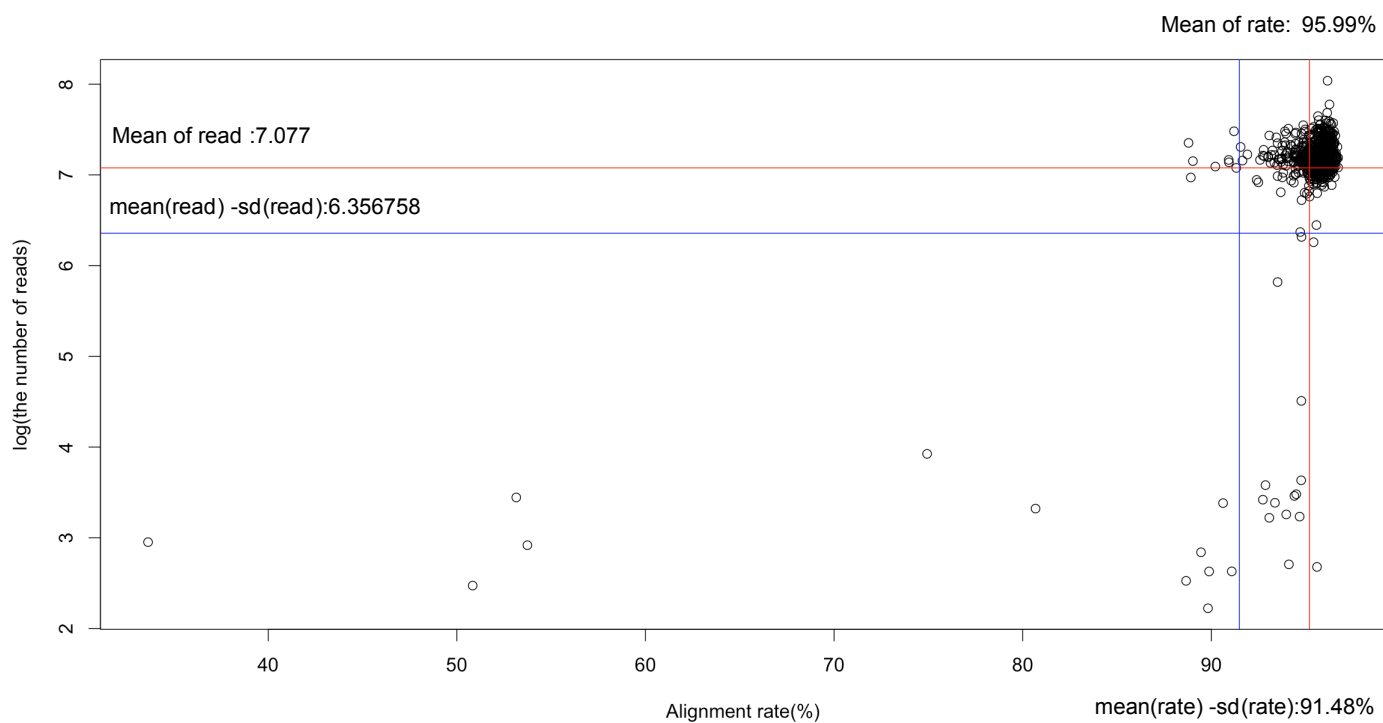

Figure 18: **Primary alignment rate and number of reads in RNA-seq samples.** Samples with an alignment rate less than 91.48% (blue vertical line) or fewer than 5M reads (blue horizontal line;  $\log_{10}$ -transformed value = 6.698) were removed.

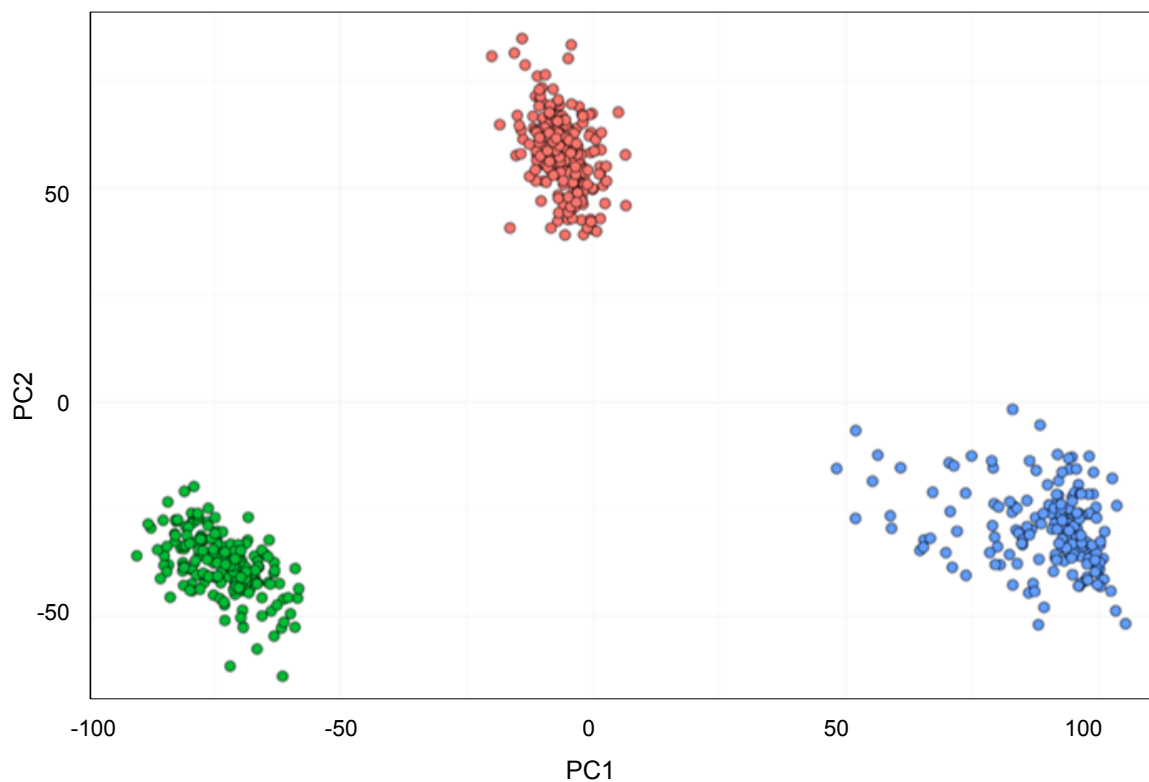

Figure 19: **Principal components analysis of RNA-seq data after correcting sample mix-ups.** The first two PCs cluster RNA-seq samples into the correct tissue types, indicating that we assigned mixed-up samples to the correct tissue. HIP is shown in pink, PFC in green, and STR in blue.

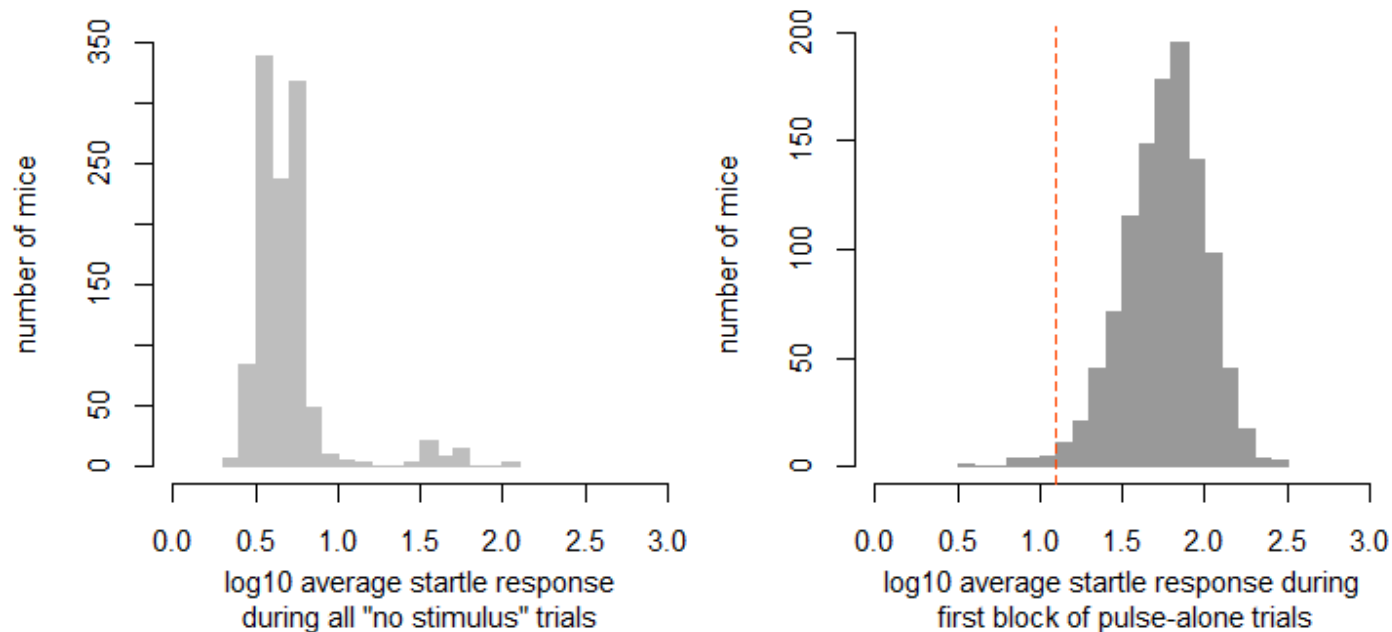

Figure 20: **Identification of outliers for startle and PPI.** (a) Distribution of the mean response measured across eight trials when no startle stimulus was presented. The right tail includes 44 mice, all of whom were tested in box 3, that appear to startle in the absence of a startle stimulus. We interpreted this as a technical effect and included box 3 as a covariate for all PPI and startle traits. (b) Distribution of the mean startle response during the first block of pulse-alone trials. Mice falling within the tail of the startle response distribution are not responding to the startle stimuli, possibly due to a hearing impairment. We excluded PPI and startle measures for 13 mice whose mean startle response overlapped the distribution of no-stimulus trials (not including mice from box 3). The cutoff point of 1.1 is marked with a dashed line. Each panel includes data for 1,123 phenotyped mice.
